# Supplementary material
Source: PubMed Central journal article supplement (PMC3470013)

# **Solving the Convergence Problem in the Synthesis of Triantennary *N*-Glycan Relevant to Prostate-Specific Membrane Antigen (PSMA)**

Maciej A. Walczak,<sup>1</sup> Samuel J. Danishefsky\*,<sup>1,2</sup>

<sup>1</sup>Laboratory for Bioorganic Chemistry, Sloan-Kettering Institute for Cancer Research, 1275 York Avenue, New York, New York 10065, United States

<sup>2</sup>Department of Chemistry, Columbia University, 3000 Broadway, New York, New York 10027, United States

## Experimental Section

**General Procedures:** All reactions were carried out under dry Ar in an oven-dried glassware. CH<sub>2</sub>Cl<sub>2</sub> was freshly distilled over CaH<sub>2</sub> and THF was filtered through a column of activated alumina prior to use. Anhydrous methanol was purchased from Aldrich. NIS was recrystallized from 1,4-dioxane/CCl<sub>4</sub> and was kept in dark. Ammonia was condensed (-78 °C) into a flask, dried with Na and then distilled into the reaction flask. All other reagents were used as received. <sup>1</sup>H and <sup>13</sup>C NMR spectra were recorded on Bruker Avance 500/600 MHz instruments and are reported as follows: chemical shift (δ), multiplicity (s = singlet, d = doublet, t = triplet, q = quartet, br = broad, m = multiplet), coupling constants (Hz), and integration. The residual solvent reference peaks were used from published literature.<sup>1</sup> IR measurements were performed on Jasco ATR FT/IR-6100 instrument and optical rotations were measured on JASCO P-2000 and are reported as average of five data points. TLC analyses were performed on Merck TLC plates and visualizations were performed with UV light and/or Hanessian stain and/or sulfuric acid stain (5% H<sub>2</sub>SO<sub>4</sub> in MeOH). Preparative purifications were performed using Silcacycle silica using HPLC grade solvents.

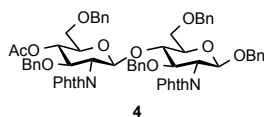

**Benzyl 4-acetyl-3,6-di-O-benzyl-2-deoxy-2-phthalimido-β-D-glucopyranosyl-(1→4)-3,6-di-O-benzyl-2-deoxy-2-phthalimido-β-D-glucopyranoside (4).** A mixture of **2** (12.1 g, 21.0 mmol) and **3** (14.7 g, 25.2 mmol) was azeotropically dried with PhMe (3x) and then on high vacuum for 1 h. This mixture was dissolved in anh. CH<sub>2</sub>Cl<sub>2</sub> (210 mL), freshly activated 4Å MS (20 g) were added and the mixture was stirred at rt for 1 h, cooled to -50 °C, NIS (4.96 g, 22.0 mmol) was added followed by AgOTf (2.70 g, 10.5 mmol). The reaction mixture was allowed to warm up to -20 °C, stirred at this temp. for 14 h, quenched with Et<sub>3</sub>N, filtered through pad of Celite, washed with sat. Na<sub>2</sub>S<sub>2</sub>O<sub>3</sub>, water, brine, dried (MgSO<sub>4</sub>), and concentrated. Purification by chrom. on SiO<sub>2</sub> (Hexanes:EtOAc, 2:1) afforded **4** (23.0 g, >99%) as a clear oil: [α]<sub>D</sub><sup>24</sup> +17.4 (c 1.0, CHCl<sub>3</sub>); IR (ATR) 3032, 2880, 1775, 1709, 1387 cm<sup>-1</sup>; <sup>1</sup>H NMR (600 MHz, CDCl<sub>3</sub>) δ 7.89 (br s, 1 H), 7.80-7.67 (br m, 6 H), 7.53-7.51 (br m, 1 H), 7.39-7.33 (m, 8 H), 7.31-7.27 (m, 1 H), 7.21-7.17 (m, 1 H), 7.08-7.06 (m, 1 H), 7.03-6.92 (m, 11 H), 6.86-6.84 (m, 3 H), 5.37 (d, *J* = 8.3 Hz, 1 H), 5.18 (t, *J* = 9.2 Hz, 1 H), 4.98 (d, *J* = 7.9 Hz, 1 H), 4.85 (d, *J* = 12.5 Hz, 1 H), 4.71 (d, *J* = 12.4 Hz, 1 H), 4.63 (d, *J* = 12.0 Hz, 1 H), 4.57 (d, *J* = 11.7 Hz, 1 H), 4.54 (d, *J* = 10.9 Hz, 1 H), 4.52-4.57 (m, 4 H), 4.39 (d, *J* = 12.4 Hz, 1 H), 4.35 (d, *J* = 12.1 Hz, 1 H), 4.31 (dd, *J* = 10.7, 8.4 Hz, 1 H), 4.28-4.15 (m, 3 H), 3.61-3.55 (m, 3 H), 3.49 (dd, *J* = 10.9, 5.9 Hz, 1 H), 3.45 (dd, *J* = 10.3, 3.9 Hz, 1 H),

3.34 (dd,  $J = 9.3, 2.6$  Hz, 1 H), 1.95 (s, 3 H);  $^{13}\text{C}$  NMR (150 MHz,  $\text{CDCl}_3$ )  $\delta$  169.7, 167.6, 138.6, 138.4, 138.2, 137.8, 137.2, 134.3, 134.1, 133.5, 131.7, 128.4 (4), 128.3, 128.1, (2), 127.9, 127.8, 127.7, 127.6, 127.5, 127.4 (2), 127.3, 126.9, 123.2, 87.1, 76.9, 76.6, 76.2, 74.5, 74.4, 73.9, 73.6, 73.4, 72.7 (2), 70.5, 69.4, 68.1, 56.3, 55.7, 20.9; HRMS (ESI) calc for  $\text{C}_{65}\text{H}_{60}\text{N}_2\text{O}_{14}\text{Na}$  ( $\text{M}+\text{Na}$ ) 1115.3942, found 1115.3954.

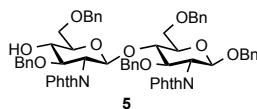

**Benzyl 3,6-di-O-benzyl-2-deoxy-2-phthalimido- $\beta$ -D-glucopyranosyl-(1 $\rightarrow$ 4)-3,6-di-O-benzyl-2-deoxy-2-phthalimido- $\beta$ -D-glucopyranoside (5).** A solution of **4** (23.0 g, 21.0 mmol) in anh. THF (100 mL) and MeOH (100 mL) was treated with a solution of NaOMe (42.0 mL, 42 mmol, 0.5 M in MeOH) and stirred at rt for 1 h. This mixture was quenched with DOWEX-50WX8, filtered, and concentrated. Purification by chrom. on  $\text{SiO}_2$  (Hexanes:EtOAc, 2:1 to 1:1) afforded **5** (20.1 g, 91%) as a clear oil:  $[\alpha]_D^{24}$  -8.52 (c 1.0,  $\text{CHCl}_3$ ), IR (ATR) 3474, 2874, 1775, 1710, 1387, 1070  $\text{cm}^{-1}$ ;  $^1\text{H}$  NMR (600 MHz,  $\text{CDCl}_3$ )  $\delta$  7.90 (d,  $J = 6.8$  Hz, 1 H), 7.77 (app. t,  $J = 5.0$  Hz, 2 H), 7.73 (br s, 2 H), 7.67 (br s, 2 H), 7.41-7.33 (m, 10 H), 7.08-7.06 (m, 4 H), 7.02-6.99 (m, 6 H), 6.98-6.96 (m, 3 H), 6.86-6.83 (m, 3 H), 5.34 (d,  $J = 8.34$  Hz, 1 H), 4.98 (d,  $J = 8.4$  Hz, 1 H), 4.81 (t,  $J = 11.8$  Hz, 2 H), 4.72 (d,  $J = 12.4$  Hz, 1 H), 4.57-4.54 (m, 2 H), 4.53 (br s, 3 H), 4.51-4.47 (m, 1 H), 4.39 (d,  $J = 12.4$  Hz, 1 H), 4.28 (dd,  $J = 10.8, 8.4$  Hz, 1 H), 4.22-4.13 (m, 4 H), 3.84 (t,  $J = 8.4$  Hz, 1 H), 3.73 (dd,  $J = 9.9, 4.3$  Hz, 1 H), 3.59-3.56 (m, 2 H), 3.47 (dd,  $J = 10.9, 3.8$  Hz, 1 H), 3.43-3.39 (m, 1 H), 3.33 (dd,  $J = 9.7, 2.5$  Hz, 1 H), 3.11 (d,  $J = 1.6$  Hz, 1 H);  $^{13}\text{C}$  NMR (150 MHz,  $\text{CDCl}_3$ )  $\delta$  168.4, 167.6, 138.6, 138.4, 138.3, 137.5, 137.2, 134.0, 133.8, 133.5, 131.7, 131.5, 128.5, 128.4, 128.2, 128.1, 128.0, 127.9 (2), 127.7 (2), 127.5, 127.4, 127.3, 126.6, 123.6, 123.1, 97.1, 96.9, 78.3, 76.5, 75.5, 74.5, 74.3, 74.1, 73.7, 72.7 (2), 71.0, 70.5, 68.2, 65.1, 55.7; HRMS (ESI) calc for  $\text{C}_{63}\text{H}_{58}\text{N}_2\text{O}_{13}\text{Na}$  ( $\text{M}+\text{Na}$ ) 1073.3837, found 1073.3833.

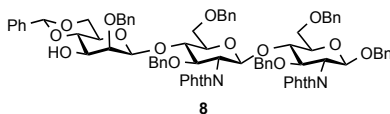

**Benzyl 2-O-benzyl-4,6-O-(R)-benzylidene- $\beta$ -D-mannopyranosyl-(1 $\rightarrow$ 4)-3,6-di-O-benzyl-2-deoxy-2-phthalimido- $\beta$ -D-glucopyranosyl-(1 $\rightarrow$ 4)-3,6-di-O-benzyl-2-deoxy-2-phthalimido- $\beta$ -D-glucopyranoside (8).** A solution of mannose sulfoxide **6** (5.28 g, 8.94 mmol) and DTBMP (7.46 g, 29.9 mmol) was azeotropically dried with PhMe (3 x 10 mL) and then on high vacuum for 2 h. Freshly activated 4Å MS (10 g) were added and the mixture was dissolved in anh.  $\text{CH}_2\text{Cl}_2$  (59.0 mL). After 1 h at rt, this mixture was cooled to -78  $^\circ\text{C}$ ,  $\text{Ti}_2\text{O}$  (1.51 mL, 8.99 mmol) was added, the mixture was allowed to

warm up to  $-60\text{ }^{\circ}\text{C}$  over 25 min, cooled to  $-78\text{ }^{\circ}\text{C}$  and a cold ( $-78\text{ }^{\circ}\text{C}$ ) solution of acceptor **5** (6.30 g, 5.99 mmol) in  $\text{CH}_2\text{Cl}_2$  (59.0 mL) was introduced *via* cannula. The mixture was stirred at  $-78\text{ }^{\circ}\text{C}$  for 12 h, quenched with  $\text{Et}_3\text{N}$ , filtered through a pad of Celite, washed with EtOAc, and concentrated. Purification by chrom. on  $\text{SiO}_2$  (Hexanes:EtOAc, 4:1 to 2:1 and PhMe:EtOAc, 4:1) afforded trisaccharide (8.0 g, 89%) as a white foam: MS (ESI)  $m/z$  calc for  $\text{C}_{91}\text{H}_{86}\text{N}_2\text{O}_{19}\text{Na}$  (M+Na) 1533.57, found 1534.57.

A mixture of trisaccharide (13.0 g) was dissolved in  $\text{CH}_2\text{Cl}_2$  (194 mL), cooled to  $0\text{ }^{\circ}\text{C}$ , pH 7 phosphate buffer (10 mL) was added, and the mixture treated with DDQ (2.37 g, 10.4 mmol). After 4 h, additional portion of DDQ (1.58 g, 6.96 mmol) was added, the mixture was stirred for 1 h, quenched with sat.  $\text{NaHCO}_3$ , extracted with EtOAc and the combined organic layers were washed with water, brine, dried ( $\text{MgSO}_4$ ), and concentrated. Purification by chrom. on  $\text{SiO}_2$  (PhMe:EtOAc, 3:1) afforded **8** (5.57 g, 56%) as a clear oil:  $[\alpha]_{\text{D}}^{24} -3.70$  (c 1.0,  $\text{CHCl}_3$ ); IR (ATR) 3398, 2871, 1713, 1453,  $1387\text{ cm}^{-1}$ ;  $^1\text{H}$  NMR (500 MHz,  $\text{CDCl}_3$ )  $\delta$  7.79 (d,  $J = 6.4$  Hz, 1 H), 7.66-7.56 (m, 7 H), 7.37-7.36 (m, 2 H), 7.32-7.16 (m, 18 H), 6.98-6.95 (m, 1 H), 6.92-6.85 (m, 8 H), 6.81-6.80 (m, 3 H), 6.69-6.68 (m, 3 H), 5.34 (s, 1 H), 5.21 (d,  $J = 7.8$  Hz, 1 H), 4.93 (d,  $J = 11.6$  Hz, 1 H), 4.88 (d,  $J = 8.3$  Hz, 1 H), 4.82 (d,  $J = 12.2$  Hz, 1 H), 4.76 (d,  $J = 12.8$  Hz, 1 H), 4.63-4.58 (m, 3 H), 4.52 (d,  $J = 12.1$  Hz, 1 H), 4.47-4.42 (m, 3 H), 4.38 (d,  $J = 12.1$  Hz, 1 H), 4.31 (d,  $J = 11.9$  Hz, 2 H), 4.19-4.12 (m, 4 H), 4.07-4.01 (m, 3 H), 3.64-3.56 (m, 3 H), 3.51-3.47 (m, 2 H), 3.42-3.56 (m, 3 H), 3.25-3.23 (m, 1 H), 3.12 (d,  $J = 9.9$  Hz, 1 H), 3.04 (dt,  $J = 9.6, 4.8$  Hz, 1 H), 2.24 (d,  $J = 8.6$  Hz, 1 H);  $^{13}\text{C}$  NMR (125 MHz,  $\text{CDCl}_3$ )  $\delta$  168.5, 167.6, 138.8, 1386, 138.5, 138.2, 137.7, 137.2 (2), 134.0, 133.8, 133.4, 131.7, 131.4, 129.0, 128.6, 128.5, 128.2 (2), 128.0 (3), 127.9 (3), 127.8 (2), 127.5 (2), 127.4, 127.3, 126.9, 126.8, 126.3, 123.6, 123.1, 101.9, 97.1, 97.0, 79.4, 79.1, 79.0, 77.1, 76.5, 75.8, 75.7, 74.6 (2), 74.5, 74.3, 73.4, 72.6, 70.9, 70.5, 68.4, 68.2, 67.8, 66.8, 56.5, 55.7; HRMS (ESI) calc for  $\text{C}_{83}\text{H}_{78}\text{N}_2\text{O}_{18}\text{Na}$  (M+Na) 1413.5147, found 1413.5082.

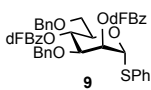

**Thiophenyl 3,6-di-O-benzyl-2,4-di-O-(2,5-difluorobenzoyl)- $\alpha$ -D-mannopyranoside (9).** A solution of thiophenyl 3,6-di-O-benzyl- $\alpha$ -D-mannopyranoside<sup>2</sup> (3.20 g, 7.08 mmol) in anh. pyridine (25.0 mL) was treated with 2,5-difluorobenzoyl chloride (2.64 mL, 21.2 mmol) and stirred at rt for 12 h. The reaction mixture was quenched with sat.  $\text{NaHCO}_3$ , extracted with EtOAc and the combined organic layers were washed with water, brine, dried ( $\text{MgSO}_4$ ), and concentrated. Purification by chrom. on  $\text{SiO}_2$  (Hexanes:EtOAc, 4:1) afforded **9** (4.21 g, 81%) as a clear oil:  $[\alpha]_{\text{D}}^{20} +28.1$  (c 1.0,  $\text{CHCl}_3$ ), IR (ATR) 3076, 2872, 1739, 1723, 1428,  $1185\text{ cm}^{-1}$ ;  $^1\text{H}$  NMR (500 MHz,  $\text{CDCl}_3$ )  $\delta$  7.58 (ddd,  $J = 8.4, 5.3, 3.3$  Hz, 1 H), 7.47-7.44 (m, 2 H), 7.36 (ddd,  $J = 13.0, 5.8, 3.4$  Hz, 1 H), 7.20-7.06 (m, 15 H), 7.01 (td,  $J = 9.3, 4.2$

Hz, 2 H), 5.79 (dd,  $J = 2.0, 2.6$  Hz, 1 H), 5.68 (t,  $J = 9.9$  Hz, 1 H), 5.58 (d,  $J = 1.5$  Hz, 1 H), 4.62 (d,  $J = 12.3$  Hz, 1 H), 4.52 (ddd,  $J = 8.9, 5.1, 3.5$  Hz, 1 H), 4.47 (d,  $J = 11.7$  Hz, 1 H), 4.42 (d,  $J = 12.3$  Hz, 1 H), 4.39 (d,  $J = 11.8$  Hz, 1 H), 3.96 (dd,  $J = 9.6, 3.0$  Hz, 1 H), 3.64 (qd,  $J = 10.9, 5.4$  Hz, 2 H);  $^{13}\text{C}$  NMR (125 MHz,  $\text{CDCl}_3$ )  $\delta$  162.3, 162.0, 159.3 (2), 158.9 (3), 158.8, 157.3, 156.9 (2), 137.8, 137.0, 132.9, 132.0 (2), 131.9, 131.3, 129.7, 129.4, 129.3, 128.2, 128.0, 127.9, 127.8, 127.7, 127.4, 121.9, 121.8, 121.6, 121.5, 121.4, 121.3, 121.2, 119.3 (3), 119.2, 119.0, 118.9 (2), 118.8, 118.7, 118.6, 118.5, 118.4 (2), 118.3, 118.2 (3), 118.1, 86.0, 74.8, 73.5, 71.5, 71.0, 70.9, 69.3, 69.1; HRMS (ESI) calc for  $\text{C}_{40}\text{H}_{32}\text{O}_7\text{SF}_4\text{Na}$  ( $\text{M}+\text{Na}$ ) 755.1703, found 755.1720.

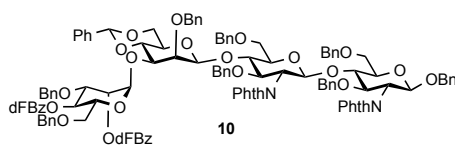

**Benzyl [3,6-di-*O*-benzyl-2,4-*O*-(2,5-difluorobenzoyl)- $\alpha$ -D-mannopyranosyl-(1 $\rightarrow$ 3)]-2-*O*-benzyl-4,6-*O*-(*R*)-benzylidene- $\beta$ -D-mannopyranosyl-(1 $\rightarrow$ 4)-3,6-di-*O*-benzyl-2-deoxy-2-phthalimido- $\beta$ -D-glucopyranosyl-(1 $\rightarrow$ 4)-3,6-di-*O*-benzyl-2-deoxy-2-phthalimido- $\beta$ -D-glucopyranoside (**10**).** A mixture of **8** (1.59 g, 1.09 mmol) and **9** (1.59 g, 2.17 mmol) was azeotropically dried with PhMe (3 x 10 mL) and under high vacuum for 2 h. This mixture was dissolved in anh.  $\text{CH}_2\text{Cl}_2$  (21.7 mL), freshly activated 3 $\text{\AA}$  MS (1.0 g) were added and after 1 h at rt, this mixture was cooled to  $-50$   $^\circ\text{C}$ , NIS (0.488 g, 2.17 mmol) was added followed by AgOTf (0.139 g, 0.54 mmol). The mixture was allowed to warm up to  $-20$   $^\circ\text{C}$ , stirred at this temp. for 12 h, quenched with  $\text{Et}_3\text{N}$ , filtered through a pad of Celite and the organic layer was washed with sat.  $\text{Na}_2\text{S}_2\text{O}_3$ , sat.  $\text{NaHCO}_3$ , brine, dried ( $\text{MgSO}_4$ ), and concentrated. Purification by chrom. on  $\text{SiO}_2$  (PhMe:EtOAc, 3:1) afforded **10** (1.97 g, 90%) as a clear oil:  $[\alpha]_{\text{D}}^{24} -69.9$  (c 1.0,  $\text{CHCl}_3$ ); IR (ATR) 3033, 2873, 1773, 1718, 1496, 1386, 1082  $\text{cm}^{-1}$ ;  $^1\text{H}$  NMR (600 MHz,  $\text{C}_6\text{D}_6$ )  $\delta$  7.73-7.70 (m, 5 H), 7.65 (br s, 1 H), 7.21-7.49 (m, 2 H), 7.44 (d,  $J = 7.3$  Hz, 3 H), 7.39-7.38 (m, 10 H), 7.24-7.16 (m, 7 H), 7.14-7.05 (m, 7 H), 7.00 (dd,  $J = 7.6, 2.5$  Hz, 2 H), 6.94-6.86 (m, 8 H), 6.85-6.83 (m, 3 H), 6.80-6.78 (m, 1 H), 6.75-6.68 (m, 3 H), 6.49-6.45 (m, 1 H), 6.40-6.36 (m, 2 H), 6.32 (dt,  $J = 9.3, 4.3$  Hz, 1 H), 6.24 (t,  $J = 2.2$  Hz, 1 H), 6.16 (t,  $J = 10.0$  Hz, 1 H), 5.73 (d,  $J = 8.0$  Hz, 1 H), 5.71 (d,  $J = 1.5$  Hz, 1 H), 5.33 (d,  $J = 12.2$  Hz, 1 H), 5.30 (s, 1 H), 5.23 (d,  $J = 8.5$  Hz, 1 H), 5.16 (d,  $J = 11.5$  Hz, 1 H), 5.11 (d,  $J = 11.8$  Hz, 1 H), 4.84 (d,  $J = 12.9$  Hz, 1 H), 4.81-4.73 (m, 5 H), 4.67-4.64 (m, 2 H), 4.63-4.52 (m, 5 H), 4.53-4.546 (m, 4 H), 4.44-4.36 (m, 5 H), 4.34-4.26 (m, 3 H), 4.14 (d,  $J = 3.2$  Hz, 1 H), 4.03 (dd,  $J = 10.3, 4.7$  Hz, 1 H), 3.93 (dd,  $J = 10.1, 2.8$  Hz, 1 H), 3.83 (d,  $J = 4.4$  Hz, 2 H), 3.64-3.58 (m, 2 H), 3.45 (d,  $J = 11.3, 2.7$  Hz, 1 H), 3.38 (d,  $J = 9.8$  Hz, 1 H), 3.27 (d,  $J = 10.2$  Hz, 1 H), 3.11 (dt,  $J = 9.5, 4.8$  Hz, 1 H), 2.93 (dd,  $J = 9.8, 8.3$  Hz, 1 H);  $^{13}\text{C}$  NMR (150 MHz,  $\text{C}_6\text{D}_6$ )  $\delta$  162.5, 159.0, 157.4, 157.3, 139.8, 139.5, 139.3 139.2,

138.5, 138.4, 138.2, 138.1 (2), 133.2, 132.3, 129.0, 128.9 (2), 128.8, 128.7 (2), 128.6 (2), 128.5, 128.4 (2), 128.3 (2), 128.1, 128.0, 127.8 (2), 127.7 (2), 127.6 (2), 127.5, 127.2, 127.1, 126.6, 123.1, 118.6 (2), 118.5, 118.4 (2), 118.3 (2), 101.8, 101.4, 99.6, 97.9, 97.8, 79.4, 79.1, 78.5, 77.9, 77.7, 77.1, 76.5, 76.2, 75.7, 75.3, 75.9, 74.8, 73.7, 73.4 73.2, 71.6, 70.6, 70.5, 70.4, 69.8, 68.6, 68.5, 67.7, 67.5, 57.3, 56.6; HRMS (ESI) calc for C<sub>117</sub>H<sub>104</sub>N<sub>2</sub>O<sub>25</sub>F<sub>4</sub>Na (M+Na) 2035.6762, found 2035.6793.

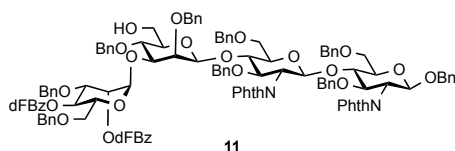

**Benzyl [3,6-di-O-benzyl-2,4-di-O-(2,5-difluorobenzoyl)- $\alpha$ -D-mannopyranosyl-(1 $\rightarrow$ 3)]-2,4-di-O-benzyl- $\beta$ -D-mannopyranosyl-(1 $\rightarrow$ 4)-3,6-di-O-benzyl-2-deoxy-2-phthalimido- $\beta$ -D-glucopyranosyl-(1 $\rightarrow$ 4)-3,6-di-O-benzyl-2-deoxy-2-phthalimido- $\beta$ -D-glucopyranoside (11).** Benzylidene acetal **10**

(1.30 g, 0.645 mmol) was azeotropically dried with PhMe (3 x 5 mL) and then on high vacuum for 1 h. This compound was cooled to 0 °C, a solution of BH<sub>3</sub>·THF (6.54 mL, 6.54 mmol, 1.0 M in THF) was added followed by a solution of *n*-Bu<sub>2</sub>BOTf (1.94 mL, 1.94 mmol, 1.0 M in CH<sub>2</sub>Cl<sub>2</sub>). The reaction mixture was stirred at 0 °C for 4 h, quenched with Et<sub>3</sub>N, MeOH was introduced and the volatiles were removed *in vacuo*. The crude mixture was concentrated from MeOH two more times and purified by chromatography on SiO<sub>2</sub> (PhMe:EtOAc, 3:1) to afford **11** (1.14 g, 88%) as a clear film: [ $\alpha$ ]<sub>D</sub><sup>20</sup> -25.4 (c 1.0, CHCl<sub>3</sub>); IR (ATR) 2926, 2870, 1713, 1496, 1389, 1268, 1074 cm<sup>-1</sup>; <sup>1</sup>H NMR (600 MHz, CDCl<sub>3</sub>)  $\delta$  7.80 (d, *J* = 7.1 Hz, 1 H), 7.65-7.63 (m, 2 H), 7.60 (br s, 2 H), 7.56-7.53 (m, 3 H), 7.34 (d, *J* = 7.4 Hz, 2 H), 7.26-7.18 (m, 13 H), 7.16-7.10 (m, 13 H), 7.06-7.00 (m, 6 H), 6.98-6.94 (m, 3 H), 6.91-6.81 (m, 11 H), 6.65-6.63 (m, 3 H), 5.60 (s, 1 H), 5.54 (t, *J* = 9.9 Hz, 1 H), 5.22 (s, 1 H), 5.21 (d, *J* = 8.2 Hz, 1 H), 4.95 (d, *J* = 12.2 Hz, 1 H), 4.88 (s, 1 H), 4.86 (d, *J* = 5.0 Hz, 1 H), 4.76 (d, *J* = 13.0 Hz, 1 H), 4.72 (d, *J* = 12.1 Hz, 1 H), 4.66 (d, *J* = 11.1 Hz, 1 H), 4.61 (d, *J* = 12.4 Hz, 1 H), 4.52 (d, *J* = 12.1 Hz, 2 H), 4.47 (d, *J* = 11.5 Hz, 2 H), 4.44-4.38 (m, 5 H), 4.31 (d, *J* = 11.8 Hz, 2 H), 4.28 (dd, *J* = 5.9, 4.4 Hz, 2 H), 4.23-4.09 (m, 4 H), 4.06-4.03 (m, 2 H), 3.99 (dd, *J* = 9.4, 3.1 Hz, 1 H), 3.97 (dd, *J* = 14.6, 8.8 Hz, 1 H), 3.83 (d, *J* = 2.8 Hz, 1 H), 3.77 (t, *J* = 9.5 Hz, 1 H), 3.58-3.55 (m, 1 H), 3.54-3.50 (m, 3 H), 3.47 (d, *J* = 10.5 Hz, 2 H), 3.36 (dd, *J* = 11.0, 3.8 Hz, 1 H), 3.33-3.31 (m, 2 H), 3.23 (dd, *J* = 9.7, 2.5 Hz, 1 H), 3.13 (d, *J* = 9.9 Hz, 1 H), 2.99 (ddd, *J* = 9.1, 4.6, 2.3 Hz, 1 H), 1.55 (t, *J* = 7.0 Hz, 1 H); <sup>13</sup>C NMR (150 MHz, CDCl<sub>3</sub>)  $\delta$  167.6, 162.2, 162.0, 158.8, 157.1, 138.9, 138.7 (2), 138.5, 137.8, 137.7, 137.6, 137.3, 137.2, 134.1, 133.9, 133.5, 131.7, 128.0, 128.5, 128.3 (2), 128.2, 128.1 (3), 128.0, 127.9 (2), 127.8, 127.7 (3), 127.6, 127.5 (2), 127.4, 127.3, 127.1 (2), 126.9, 126.8, 123.8, 123.1, 118.7, 118.5 (2), 118.4 (2), 118.3, 118.2 (2), 118.1, 100.9, 99.7, 97.2, 97.1, 82.0, 78.5, 78.4, 77.0, 76.7, 76.0, 75.5, 75.2, 74.8, 74.6, 74.5, 74.3 (2), 73.6, 73.2,

72.8, 71.5, 70.8, 70.5, 69.5, 69.4, 69.2, 68.2, 67.5, 62.0, 56.5, 55.8; HRMS (ESI) calc for  $C_{117}H_{106}N_2O_{25}F_4Na$  (M+Na) 2037.6919, found 2037.7015.

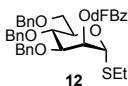

**Thioethyl 3,4,6-tri-*O*-benzyl-2-*O*-(2,5-difluorobenzoyl)- $\alpha$ -D-mannopyranoside (12).** A solution of thioethyl 3,4,6-tri-*O*-benzyl- $\alpha$ -D-mannopyranoside<sup>2</sup> (1.54 g, 3.11 mmol) in anh. pyridine (10.0 mL) was treated with 2,5-difluorobenzoyl chloride (0.77 mL, 6.22 mmol) and stirred at rt for 2 h. This mixture was quenched with sat.  $NaHCO_3$ , diluted with EtOAc and the organic layer was washed with water, sat.  $CuSO_4$ , sat.  $NaHCO_3$ , brine, dried ( $MgSO_4$ ), and concentrated. Purification by chrom. on  $SiO_2$  (Hexanes:EtOAc, 4:1) afforded **12** (1.59 g, 81%) as a clear oil:  $[\alpha]_D^{20} +35.0$  (c 1.0,  $CHCl_3$ ); IR (ATR) 3031, 2871, 1736, 1718, 1496, 1270, 1098  $cm^{-1}$ ;  $^1H$  NMR (500 MHz,  $CDCl_3$ )  $\delta$  7.63-7.60 (m, 1 H), 7.32-7.13 (m, 14 H), 7.11-7.08 (m, 2 H), 7.03 (dt,  $J = 9.3, 4.2$  Hz, 1 H), 5.59 (s, 1 H), 5.36 (s, 1 H), 4.77 (d,  $J = 10.8$  Hz, 1 H), 4.67 (d,  $J = 11.4$  Hz, 1 H), 4.63 (d,  $J = 12.2$  Hz, 1 H), 4.50 (d,  $J = 11.4$  Hz, 1 H), 4.41 (app. t,  $J = 12.4$  Hz, 2 H), 4.12 (dd,  $J = 9.6, 2.0$  Hz, 1 H), 4.00 (t,  $J = 9.5$  Hz, 1 H), 3.92 (dd,  $J = 9.3, 2.9$  Hz, 1 H), 3.78 (dd,  $J = 10.8, 4.0$  Hz, 1 H), 3.06 (d,  $J = 10.7$  Hz, 1 H), 2.64-2.50 (m, 2 H), 1.21 (t,  $J = 7.4$  Hz, 3 H);  $^{13}C$  NMR (125 MHz,  $CDCl_3$ )  $\delta$  162.3 (3), 162.2, 159.3 (2), 158.9 (2), 157.3 (2), 157.0 (2), 138.2 (2), 137.6, 129.0, 128.4, 128.3, 128.2 (2), 128.1, 127.9, 127.7, 127.6, 127.5, 125.3, 121.6 (2), 121.5, 121.4, 119.4 (3), 119.3, 118.6, 118.5, 118.4, 118.3, 82.8, 78.5, 75.2, 74.5, 73.3, 71.9, 71.8, 71.7, 68.7, 25.6, 14.9; HRMS (ESI) calc for  $C_{36}H_{36}O_6SF_2Na$  (M+Na) 657.2098, found 657.2109.

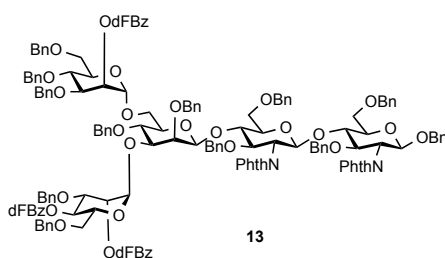

**Benzyl [3,6-di-*O*-benzyl-2,4-di-*O*-(2,5-difluorobenzoyl)- $\alpha$ -D-mannopyranosyl-(1 $\rightarrow$ 3)]-[3,4,6-tri-*O*-benzyl-2-*O*-(2,5-difluorobenzoyl)- $\alpha$ -D-mannopyranosyl-(1 $\rightarrow$ 6)]-2,4-di-*O*-benzyl- $\beta$ -D-mannopyranosyl-(1 $\rightarrow$ 4)-3,6-di-*O*-benzyl-2-deoxy-2-phthalimido- $\beta$ -D-glucopyranoside (13).** A mixture of **12** (0.410 g, 0.644 mmol) and **11** (0.650 g, 0.322 mmol) was azeotropically dried with PhMe (3x) and then on high vacuum for 1 h. This mixture was dissolved in anh.  $CH_2Cl_2$  (8.1 mL), freshly activated 4Å MS (0.50 g) were added and after 1 h at rt, this mixture was cooled to  $-20$  °C, NIS (0.152 g, 0.676 mmol) was added, followed by

AgOTf (41.0 mg, 0.160 mmol). The reaction mixture was stirred at -20 °C for 12 h, quenched with Et<sub>3</sub>N, filtered through a pad of Celite, washed with sat. Na<sub>2</sub>S<sub>2</sub>O<sub>3</sub>, water, brine, dried (MgSO<sub>4</sub>), and concentrated. Purification by chrom. on SiO<sub>2</sub> (PhMe:EtOAc, 3:1) afforded **13** (0.748 g, 90%) as a white foam:  $[\alpha]_D^{24}$  -16.8 (c 1.0, CHCl<sub>3</sub>), IR (ATR) 2923, 2870, 1716, 1495, 1269 cm<sup>-1</sup>; <sup>1</sup>H NMR (600 MHz, CDCl<sub>3</sub>) δ 7.67 d, *J* = 7.14 Hz, 2 H), 7.58 (t, *J* = 7.14 Hz, 1 H), 7.43 (d, *J* = 7.14 Hz, 1 H), 7.39 (d, *J* = 7.5 Hz, 2 H), 7.33-7.31 (m, 1 H), 7.27-7.22 (m, 2 H), 7.21-7.06 (m, 38 H), 7.04-6.97 (m, 8 H), 6.96-6.92 (m, 3 H), 6.89-6.85 (m, 4 H), 6.82-6.79 (m, 3 H), 6.76-6.75 (m, 2 H), 6.64-6.59 (m, 3 H), 6.51-6.46 (m, 3 H), 5.56 (br s, 1 H), 5.59 (t, *J* = 9.81 Hz, 1 H), 5.48 (br s, 1 H), 5.21 (s, 1 H), 5.12 (d, *J* = 8.04 Hz, 1 H), 5.04 (d, *J* = 12.1 Hz, 1 H), 4.94 (d, *J* = 1.3 Hz, 1 H) 4.84 (d, *J* = 8.5 Hz, 1 H), 4.80 (d, *J* = 13.1 Hz, 1 H), 4.78 (d, *J* = 12.1 Hz, 1 H), 4.71 (t, *J* = 14.0 Hz, 1 H), 4.62 (d, *J* = 11.3 Hz, 1 H), 4.59-4.53 (m, 3 H), 4.48 (d, *J* = 12.1 Hz, 2 H), 4.45 (d, *J* = 8.3 Hz, 1 H), 4.44-4.39 (m, 6 H), 4.38-3.35 (m, 4 H), 4.32 (dd, *J* = 5.6, 3.3 Hz, 2 H), 4.30 (d, *J* = 3.1 Hz, 1 H), 4.25 (d, *J* = 12.4 Hz, 1 H), 4.21 (d, *J* = 11.4 Hz, 1 H), 4.13-4.10 (m, 2 H), 4.09-4.04 (m, 4 H), 4.01-3.97 (m, 2 H), 3.93 (d, *J* = 9.6 Hz, 1 H), 3.89-3.87 (m, 2 H), 3.84 (d, *J* = 9.4 Hz, 1 H), 3.82-3.79 (m, 1 H), 3.69 (d, *J* = 10.7 Hz, 1 H), 3.63-6.58 (m, 2 H), 3.56-3.53 (m, 2 H), 3.51-3.48 (m, 3 H), 3.40 (d, *J* = 10.2 Hz, 1 H), 3.33-3.31 (m, 1 H), 3.28 (dd, *J* = 10.8, 3.8 Hz, 1 H), 3.17 (dd, *J* = 9.5, 2.5 Hz, 1 H), 3.10 (d, *J* = 9.4 Hz, 1 H), 3.04 (d, *J* = 9.8 Hz, 1 H); <sup>13</sup>C NMR (150 MHz, CDCl<sub>3</sub>) δ 168.1, 167.5, 167.3, 162.0, 161.6, 159.1, 158.8, 158.7, 158.6, 158.5, 157.4, 157.3, 157.1 (2), 157.0 (3), 156.9 (2), 138.9, 138.6, 138.5, 138.4 (3), 137.8 (2), 137.7, 137.5, 137.3, 137.1, 133.6, 133.4, 133.3, 131.6, 131.4, 128.5, 128.4, 128.3 (3), 128.2, 128.1 (3), 128.0 (3), 127.8, 127.7, 127.6, 127.4 (2), 127.3, 127.2 (3), 123.4, 123.0, 121.7, 121.6, 121.5 (2), 121.3, 121.2, 121.1 (2), 121.0, 120.9, 120.8, 119.4 (3), 119.3 (2), 119.2 (2), 119.1 (2), 119.0, 118.9, 118.6, 118.5, 118.4 (2), 118.3 (2), 118.2 (2), 101.9, 99.7, 98.0, 97.0 (2), 82.2, 80.0, 78.2, 77.4, 76.5, 75.8, 75.1, 75.0, 74.8, 74.6, 74.5, 74.4 (2), 74.3, 74.1 (2), 73.6, 73.2, 73.0, 72.6, 72.0, 71.5, 70.8, 70.4, 69.4, 69.3, 69.2, 68.7, 68.0, 67.5, 66.4, 56.5, 55.7; HRMS (ESI) calc for C<sub>151</sub>H<sub>136</sub>N<sub>2</sub>O<sub>31</sub>F<sub>6</sub>Na (M+Na) 2609.8929, found 2609.8945.

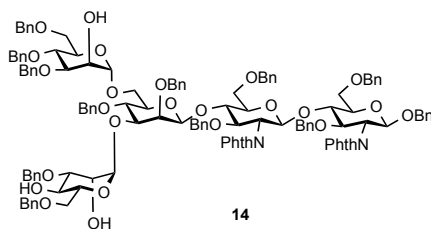

**Benzyl [3,6-di-*O*-benzyl- $\alpha$ -D-mannopyranosyl-(1 $\rightarrow$ 3)]-[3,4,6-tri-*O*-Benzyl- $\alpha$ -D-mannopyranosyl-(1 $\rightarrow$ 6)]-2,4-di-*O*-benzyl- $\beta$ -D-mannopyranosyl-(1 $\rightarrow$ 4)-3,6-di-*O*-benzyl-2-deoxy-2-phthalimido- $\beta$ -D-glucopyranosyl-(1 $\rightarrow$ 4)-3,6-di-*O*-benzyl-2-deoxy-2-phthalimido- $\beta$ -D-glucopyranoside (14).** A solution of **13** (0.748 g, 0.289 mmol) in anh. CH<sub>2</sub>Cl<sub>2</sub> (4.0 mL) and MeOH (6.0 mL) was treated with NaOMe



(0.867 mL, 0.433 mmol, 0.5 M in MeOH) and stirred at rt for 1 h 30 min. The mixture was quenched with DOWEX-50WX8, filtered, and concentrated. Purification by chrom. on SiO<sub>2</sub> (PhMe:EtOAc, 3:1) afforded **14** (0.520 g, 83%) as a clear oil:  $[\alpha]_D^{24} +11.6$  (c 1.0, CHCl<sub>3</sub>); IR (ATR) 3475, 3031, 2917, 2873, 1777, 1718, 1496, 1452, 1386, 1075 cm<sup>-1</sup>; <sup>1</sup>H NMR (500 MHz, CDCl<sub>3</sub>)  $\delta$  7.82-7.80 (m, 1 H), 7.74-7.71 (m, 2 H), 7.678-7.59 (m, 3 H), 7.48 (d,  $J = 7.5$  Hz, 1 H), 7.35-7.18 (m, 40 H), 7.14-7.13 (m, 2 H), 7.08-7.7.06 (m, 1 H), 7.03-6.97 (m, 6 H), 6.89-6.87 (d,  $J = 6.9$  Hz, 1 H), 6.76-6.72 (m, 6 H), 5.29-5.27 (m, 1 H), 5.17 (s, 1 H), 5.07 (d,  $J = 11.9$  Hz, 1 H), 5.02-4.96 (m, 3 H), 4.85 (t,  $J = 13.4$  Hz, 1 H), 4.77 (d,  $J = 10.9$  Hz, 1 H), 4.72 (d,  $J = 12.4$  Hz, 1 H), 4.67-4.63 (m, 4 H), 4.61-4.58 (m, 1 H), 4.56-4.49 (m, 8 H), 4.46 (d,  $J = 6.7$  Hz, 1 H), 4.43-4.33 (m, 5 H), 4.22-4.19 (m, 4 H), 4.16-4.14 (m, 1 H), 4.12-4.09 (m, 1 H), 3.97-3.89 (m, 6 H), 3.85 (dd,  $J = 11.8, 3.3$  Hz, 1 H), 3.82-3.71 (m, 7 H), 3.65-3.52 (m, 5 H), 3.47-3.43 (m, 2 H), 3.33-3.32 (m, 1 H), 3.22-3.20 (m, 2 H), 2.41 (s, 1 H), 2.29 (s, 1 H), 2.09 (s, 1 H); <sup>13</sup>C NMR (150 MHz, CDCl<sub>3</sub>)  $\delta$  167.6, 139.1, 138.9, 138.6, 138.4, 138.3, 138.0 (2), 137.9, 137.8, 137.7, 137.2, 128.6 (3), 128.5, 128.4, 128.3, 128.2 (4), 128.1, 128.0, 127.9 (2), 127.8 (5), 127.7, 127.6 (2), 127.5 (2), 127.4 (3), 127.3 (2), 127.2, 126.8 (2), 101.6 (2), 99.8, 97.0, 81.7, 79.6, 79.3, 79.2, 78.5, 76.6, 75.9, 75.0, 74.8 (2), 74.7, 74.5, 74.4, 74.3, 74.1, 73.7, 73.3, 73.1, 72.7, 72.1, 71.5, 71.4, 71.2, 70.5, 70.4, 68.8, 68.1, 68.0, 67.7, 56.5, 55.7; HRMS (ESI) calc for C<sub>130</sub>H<sub>130</sub>N<sub>2</sub>O<sub>28</sub>Na (M+Na) 2189.8708, found 2189.8740.

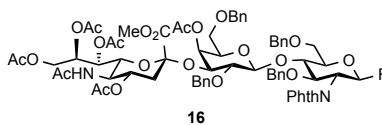

**Methyl 5-acetamido-4,7,8,9-tetra-O-acetyl-3,5-dideoxy-D-glycero- $\beta$ -D-galacto-non-2-ulopyranosylate-(2 $\rightarrow$ 3)-2,6-di-O-benzyl- $\beta$ -D-galactopyranosyl-(1 $\rightarrow$ 4)-3,6-di-O-benzyl-2-deoxy-2-phthalimido- $\beta$ -D-glucopyranosyl fluoride (16).** A solution of **15** (0.659 g, 0.474 mmol) in anh. CH<sub>2</sub>Cl<sub>2</sub> (2.90 mL) was cooled to 0 °C, treated with NBS (0.127g, 0.565 mmol) and HF/pyridine (0.173 mL, 70% HF/pyridine). After 20 min this mixture was poured into water, extracted (3x) with EtOAc and the combined organic layers were washed with water, brine, dried (MgSO<sub>4</sub>), and concentrated. Purification by chrom. on SiO<sub>2</sub> (PhMe:Acetone, 1:1) afforded **16** (0.582 g, 91%, 5:1 mixture of anomers) as a white foam:  $[\alpha]_D^{24} +16.1$  (c 1.0, CHCl<sub>3</sub>); IR (ATR) 2873, 1745, 1718, 1387, 1370, 1225, 1121, 1075 cm<sup>-1</sup>; <sup>1</sup>H NMR (600 MHz, CD<sub>3</sub>CN)  $\delta$  (major anomer) 7.84-7.80 (m, 5 H), 7.53 (d,  $J = 7.4$  Hz, 2 H), 7.46-7.42 (m, 2 H), 7.42-7.27 (m, 9 H), 7.02-6.97 (m, 3 H), 6.93 (q,  $J = 7.3$  Hz, 3 H), 6.13 (d,  $J = 9.8$  Hz, 1 H), 5.89 (dd,  $J = 54.1, 7.9$  Hz, 1 H), 5.57 (ddd,  $J = 8.3, 5.4, 2.9$  Hz, 1 H), 5.32 (dd,  $J = 8.3, 2.3$  Hz, 1 H), 5.17 (d,  $J = 3.2$  Hz, 1 H), 4.97 (d,  $J = 12.1$  Hz, 1 H), 4.95-4.89 (m, 1 H), 4.77 (d,  $J = 11.9$  Hz, 1 H), 4.73 (d,  $J = 7.6$  Hz, 1 H), 4.71-4.56 (m, 3 H), 4.55-4.48 (m, 2 H), 4.43 (d,  $J = 11.6$  Hz, 1 H), 4.38 (d,  $J = 11.8$  Hz, 1 H), 4.33 (dd,  $J = 12.5, 2.9$  Hz, 1 H), 4.27 (dd,  $J = 10.8, 8.8$  Hz, 1 H), 4.17-4.04 (m, 4 H), 3.88-3.86 (m, 2 H),

3.83 (s, 3 H), 3.80-3.76 (m, 2 H), 3.70-3.66 (m, 1 H), 3.64-3.57 (m, 1 H), 3.53-3.48 (m, 1 H), 3.43 (d,  $J = 6.3$  Hz, 1 H), 2.58 (dd,  $J = 12.5, 4.7$  Hz, 1 H), 2.07 (s, 3 H), 1.97 (s, 3 H), 1.96 (s, 3 H), 1.95 (s, 3 H), 1.91 (s, 3 H), 1.84 (dd,  $J = 11.1, 8.8$  Hz, 1 H), 1.79 (s, 3 H);  $^{13}\text{C}$  NMR (150 MHz,  $\text{CD}_3\text{CN}$ )  $\delta$  (major anomer) 178.0 170.0, 169.6, 169.5, 169.4, 167.8, 167.5, 139.1, 138.2, 138.1, 134.2, 131.0, 129.2, 128.1, 128.0, 127.9 (2), 127.7 (3), 127.6 (2), 127.4, 127.3 (2), 127.2 (2), 127.1 (2), 127.0 (2), 123.0, 105.4, 104.0, 101.6, 97.3, 78.7, 75.8, 73.8, 73.0, 72.5, 72.3, 71.6, 69.2, 68.8, 68.2, 67.8, 67.4, 67.1, 61.7, 52.3, 48.1, 36.7, 21.9, 20.2, 19.8 (2), 19.7, 19.5; HRMS (ESI) calc for  $\text{C}_{70}\text{H}_{77}\text{N}_2\text{O}_{24}\text{FNa}$  ( $\text{M}+\text{Na}$ ) 1371.4748, found 1371.4799.

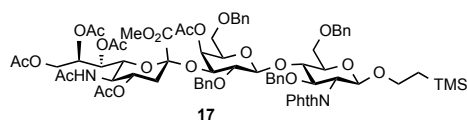

**Methyl 5-acetamido-4,7,8,9-tetra-*O*-acetyl-3,5-dideoxy-D-glycero- $\beta$ -D-galacto-non-2-ulopyranosylate-(2 $\rightarrow$ 3)-2,6-di-*O*-benzyl- $\beta$ -D-galactopyranosyl-(1 $\rightarrow$ 4)-((2-trimethylsilyl)ethyl)-3,6-di-*O*-benzyl-2-deoxy-2-phthalimido- $\beta$ -D-glucopyranoside (17).**

A mixture of **15** (0.260 g, 0.186 mmol) and 2-(trimethylsilyl)ethanol (0.054 mL, 0.374 mmol) was dissolved in anhydrous  $\text{CH}_2\text{Cl}_2$  (3.72 mL) and 4Å MS (0.10 g) were added. After 1 h at rt, this mixture was cooled to  $-50$  °C, NIS (0.0631 g, 0.280 mmol) was added, followed by AgOTf (0.0238 g, 0.0925 mmol). The reaction mixture was allowed to warm up to  $-25$  °C, stirred at this temp. for 2 h, quenched with  $\text{Et}_3\text{N}$ , warmed up to rt, filtered through a pad of Celite, washed with sat.  $\text{Na}_2\text{S}_2\text{O}_3$ , water, brine, dried ( $\text{MgSO}_4$ ), and concentrated. Purification by chrom. on  $\text{SiO}_2$  (PhMe:EtOAc, 1:2.5) afforded **17** (0.253 g, 94%) as an off-white foam:  $[\alpha]_{\text{D}}^{24} +8.7$  (c 1.0,  $\text{CHCl}_3$ ); IR (ATR) 2951, 2860, 1743, 1716, 1385, 1365, 1226  $\text{cm}^{-1}$ ;  $^1\text{H}$  NMR (600 MHz,  $\text{CDCl}_3$ )  $\delta$  7.95 (br s, 1 H), 7.84 (br s, 3 H), 7.64 (d,  $J = 7.4$  Hz, 2 H), 7.58-7.52 (m, 3 H), 7.51-7.38 (m, 10 H), 7.16 (dd,  $J = 7.1, 1.5$  Hz, 2 H), 7.09-7.01 (m, 3 H), 5.76 (ddd,  $J = 10.9, 5.2, 2.6$  Hz, 1 H), 5.57-5.48 (m, 1 H), 5.29 (d,  $J = 10.2$  Hz, 1 H), 5.26 (d,  $J = 11.3$  Hz, 1 H), 5.21 (d,  $J = 3.4$  Hz, 1 H), 5.14 (d,  $J = 12.4$  Hz, 1 H), 5.09 (ddd,  $J = 11.9, 10.6, 4.7$  Hz, 1 H), 5.02 (d,  $J = 12.1$  Hz, 1 H), 4.91 (br s, 1 H), 4.89 (d,  $J = 3.4$  Hz, 1 H), 4.78-4.73 (m, 1 H), 4.69 (dd,  $J = 9.5, 3.4$  Hz, 2 H), 4.59 (d,  $J = 11.8$  Hz, 1 H), 4.49 (dd,  $J = 12.7, 2.6$  Hz, 1 H), 4.46-4.42 (m, 2 H), 4.36-4.33 (m, 1 H), 4.29 (d,  $J = 10.9$  Hz, 1 H), 4.24-4.19 (m, 2 H), 4.07-4.03 (m, 1 H), 3.99 (s, 3 H), 3.98-3.96 (m, 1 H), 3.94-3.88 (m, 3 H), 3.69-3.66 (m, 2 H), 3.65-3.62 (m, 1 H), 3.62-3.58 (m, 1 H), 3.52 (dd,  $J = 10.0, 5.8$  Hz, 1 H), 3.42 (dd,  $J = 10.0, 7.0$  Hz, 1 H), 2.76 (dd,  $J = 12.5, 4.6$  Hz, 1 H), 2.25 (s, 3 H), 2.19 (t,  $J = 2.0$  Hz, 1 H), 2.18 (s, 3 H), 2.14 (s, 3 H), 2.12 (s, 3 H), 2.03 (s, 3 H), 2.00 (s, 3 H), 0.97-0.92 (m, 1 H), 0.90-0.85 (m, 1 H), 0.00 (s, 9 H);  $^{13}\text{C}$  NMR (150 MHz,  $\text{CDCl}_3$ )  $\delta$  170.8, 170.5, 170.3, 169.9, 169.8, 167.9, 139.2, 138.9, 138.6, 138.2, 128.3 (3), 128.2, 128.1 (2), 127.8, 127.7, 127.6 (3), 127.4 (2), 127.3 (2), 127.2 (2), 126.9, 102.2, 97.6, 97.3, 79.3, 77.6, 75.1, 75.0, 73.9,

73.6, 73.2, 72.8, 72.3, 71.6, 69.5, 68.8, 68.5, 68.3, 68.0, 67.1, 66.5, 62.0, 55.7, 53.0, 49.2, 37.5, 23.2, 21.2, 20.8, 20.7, 20.6, 20.5, 17.7, -1.6; IR (ATR); HRMS (ESI) calc for C<sub>75</sub>H<sub>90</sub>N<sub>2</sub>O<sub>25</sub>SiNa (M+Na) 1469.5500, found 1469.5471.

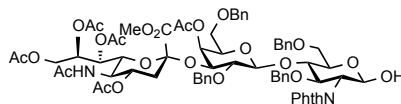

18

**Methyl 5-acetamido-4,7,8,9-tetra-*O*-acetyl-3,5-dideoxy-D-glycero-β-D-galacto-non-2-uloopyranosylate-(2→3)-2,6-di-*O*-benzyl-β-D-galactopyranosyl-(1→4)-3,6-di-*O*-benzyl-2-deoxy-2-phthalimido-β-D-glucopyranoside (18).** A solution of **17** (0.200 g, 0.138 mmol) in CH<sub>2</sub>Cl<sub>2</sub> (1.50 mL) was cooled to 0 °C, treated with TFA (0.420 mL) and stirred at this temp. for 5 h. The reaction mixture was concentrated and purification by chrom. on SiO<sub>2</sub> (PhMe:EtOAc, 1:2.5) afforded **18** (0.125 g, 67%, 7.7:1 mixture of anomers) as a white foam: [α]<sub>D</sub><sup>24</sup> +15.0 (c 1.0, CHCl<sub>3</sub>), IR (ATR) 3388, 2873, 1743.3, 1713, 1369, 1222 cm<sup>-1</sup>; <sup>1</sup>H NMR (600 MHz, CDCl<sub>3</sub>) δ 7.55 (d, *J* = 7.4 Hz, 2 H), 7.50 (d, *J* = 7.4 Hz, 2 H), 7.40-7.36 (m, 5 H), 7.30-7.20 (m, 7 H), 7.1407.09 (m, 2 H), 6.87-6.74 (m, 6 H), 5.98-5.94 (m, 1 H), 5.6405.58 (m, 1 H), 5.50 (dd, *J* = 8.4, 2.6 Hz, 1 H), 5.46 (d, *J* = 3.3 Hz, 1 H), 5.24 (d, *J* = 11.9 Hz, 1 H), 5.12 (d, *J* = 7.6 Hz, 1 H), 5.03 (d, *J* = 12.4 Hz, 1 H), 5.00-4.94 (m, 2 H), 4.88-4.86 (m, 1 H), 4.78-4.72 (m, 3 H), 4.65-4.54 (m, 3 H), 4.47-4.42 (m, 2 H), 4.41-4.36 (m, 1 H), 4.35-4.31 (m, 1 H), 4.23 (d, *J* = 12.0 Hz, 1 H), 4.21 (d, *J* = 10.4 Hz, 1 H), 4.11 (t, *J* = 6.6 Hz, 1 H), 4.00 (dd, *J* = 10.8, 4.4 Hz, 1 H), 3.91 (d, *J* = 9.6 Hz, 1 H), 3.85-3.81 (m, 1 H), 3.79 (s, 3 H), 3.70-3.63 (m, 2 H), 3.42-3.27 (m, 2 H), 2.84 (dd, *J* = 12.4, 4.6 Hz, 1 H), 2.09 (s, 3 H), 1.92 (t, *J* = 5.0 Hz, 1 H), 1.90 (s, 3 H), 1.78 (s, 3 H), 1.78 (s, 3 H), 1.68 (s, 3 H), 1.65 (s, 3 H), 1.64 (s, 3 H); <sup>13</sup>C NMR (150 MHz, C<sub>6</sub>D<sub>6</sub>) δ 170.3 (2), 170.0, 169.9, 169.8, 168.9, 139.8 (2), 139.3, 139.0, 138.9, 133.4, 132.2, 130.1, 129.2, 128.8, 128.5 (2), 127.7, 127.2, 127.1, 123.2, 103.0, 97.8, 93.6, 80.3, 78.2, 77.8, 75.9, 75.8, 74.4, 74.1, 73.4, 72.8, 72.2, 69.7, 69.3, 69.2, 68.9, 68.2, 67.2, 62.6, 58.2, 53.1, 49.0, 38.4, 23.1, 21.3, 20.8, 20.5, 20.4 (2); HRMS (ESI) calc for C<sub>70</sub>H<sub>78</sub>N<sub>2</sub>O<sub>25</sub>Na (M+Na) 1369.4791, found 1369.4839.

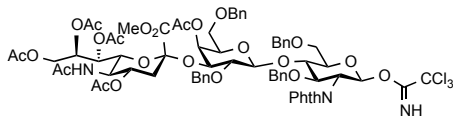

19

**Methyl 5-acetamido-4,7,8,9-tetra-*O*-acetyl-3,5-dideoxy-D-glycero-β-D-galacto-non-2-uloopyranosylate-(2→3)-2,6-di-*O*-benzyl-β-D-galactopyranosyl-(1→4)-3,6-di-*O*-benzyl-2-deoxy-2-phthalimido-β-D-glucopyranosyl trichloroacetimidate (19).** A solution of **18** (0.125 g, 0.0927 mmol)

in anh. CH<sub>2</sub>Cl<sub>2</sub> (1.0 mL) was cooled to 0 °C and treated with CCl<sub>3</sub>CN (0.046 mL, 0.464 mmol) and DBU (0.0139 mL, 0.0927 mmol). After 2 h at 0 °C, the volatiles were removed *in vacuo* and the residual material was purified by chrom. on SiO<sub>2</sub> (PhMe:Acetone, 1:1) to afford crude **19** (0.120 g, 87%) as a light-yellow oil. This material was taken immediately to the next step. <sup>1</sup>H NMR (600 MHz, CDCl<sub>3</sub>) δ (representative signals) 5.86-5.84 (m, 1 H), 3.68 (s, 3 H), 3.56 (dd, *J* = 10.7, 2.6 Hz, 1 H), 2.73 (dd, *J* = 12.5, 4.7 Hz, 1 H); <sup>13</sup>C NMR (150 MHz, CDCl<sub>3</sub>) δ (representative signals) 170.2, 170.0 (2), 169.9 (2), 169.2, 168.6, 161.0, 102.7, 97.5, 94.6; HRMS (ESI) calc for C<sub>72</sub>H<sub>78</sub>N<sub>3</sub>O<sub>25</sub>Cl<sub>3</sub>Na (M+Na) 1512.3888, found 1512.3929.

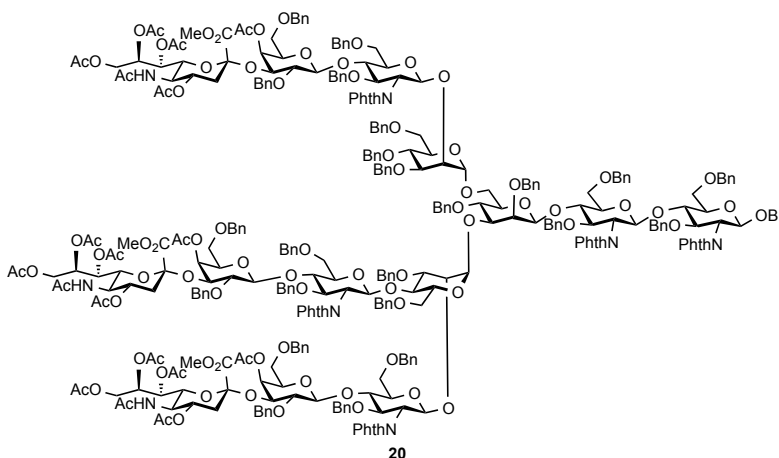

**Benzyl [2,4-bis[methyl [5-acetamido-4,7,8,9-tetra-*O*-acetyl-3,5-dideoxy-*D*-glycero- $\beta$ -*D*-galacto-non-2-ulopyranosylate]-(2→3)-2,6-di-*O*-benzyl- $\beta$ -*D*-galactopyranosyl-(1→4)-3,6-di-*O*-benzyl-2-deoxy-2-phthalimido- $\beta$ -*D*-glucopyranosyl]]-3,6-di-*O*-benzyl- $\alpha$ -*D*-mannopyranosyl-(1→3)]-[2-[methyl [5-acetamido-4,7,8,9-tetra-*O*-acetyl-3,5-dideoxy-*D*-glycero- $\beta$ -*D*-galacto-non-2-ulopyranosylate]-(2→3)-2,6-di-*O*-benzyl- $\beta$ -*D*-galactopyranosyl-(1→4)]-3,6-di-*O*-benzyl-2-deoxy-2-phthalimido- $\beta$ -*D*-glucopyranosyl]-3,4,6-tri-*O*-benzyl- $\alpha$ -*D*-mannopyranosyl-(1→6)]-2,4-di-*O*-benzyl- $\beta$ -*D*-mannopyranosyl-(1→4)-3,6-di-*O*-benzyl-2-deoxy-2-phthalimido- $\beta$ -*D*-glucopyranosyl-(1→4)-3,6-di-*O*-benzyl-2-deoxy-2-phthalimido- $\beta$ -*D*-glucopyranoside (**20**).** Table 1, entry 4. A mixture of **14** (0.0278 g, 0.0128 mmol) and **15** (0.214 g, 0.154 mmol) was dried overnight over P<sub>2</sub>O<sub>5</sub> and dissolved in anh. CH<sub>2</sub>Cl<sub>2</sub> (0.32 mL), freshly activated 3Å MS (50 mg) were added. After 1 h at rt, this mixture was cooled to -20 °C, NIS (0.0432 g, 0.0192 mmol) was added, followed by AgOTf (9.6 mg, 0.0375 mmol). The reaction mixture was stirred at -20 °C for 24 h, quenched at this temp. with Et<sub>3</sub>N, filtered through a pad of Celite, washed with sat. Na<sub>2</sub>S<sub>2</sub>O<sub>3</sub>, water brine, dried (MgSO<sub>4</sub>), and concentrated. Repeated purification by gravity filtration on LH-20 (CH<sub>2</sub>Cl<sub>2</sub>:MeOH, 1:1), chromatography on SiO<sub>2</sub> (PhMe:MeCN, 1:2) and BioGel S-X1 (PhMe:Acetone 1:1) and afforded **20** (16.9 mg, 21%) as a white powder.

Synthesis from **27**. A mixture of acceptor **27** (0.0287 g, 0.00821 mmol) and donor **15** (0.114 g, 0.0821 mmol) was azeotropically dried with PhMe (3 x 2 mL) and then on high vacuum for 3 h. This mixture was dissolved in anh CH<sub>2</sub>Cl<sub>2</sub> (0.21 mL), freshly activated 3Å MS (0.10 g) were added and after 1 h at rt, this mixture was cooled to -20 °C, NIS (0.0369 g, 0.164 mmol) was added, followed by AgOTf (2.1 mg). After 22 h, additional portion of AgOTf (5.0 mg) was added and the mixture was stirred at -20 °C for total 36 h. The reaction mixture was quenched with Et<sub>3</sub>N, filtered through a pad of Celite, washed with sat. Na<sub>2</sub>S<sub>2</sub>O<sub>3</sub>, sat. NaHCO<sub>3</sub>, water, brine, dried (MgSO<sub>4</sub>), and concentrated. Purification by chrom on SiO<sub>2</sub> (PhMe:MeCN, 1:2) and LH-20 (MeOH:CH<sub>2</sub>Cl<sub>2</sub>, 1:1) afforded **20** (0.0251 g, 50%) as a clear oil: [ $\alpha$ ]<sub>D</sub><sup>24</sup> -0.10 (c 1.0, CHCl<sub>3</sub>); IR (ATR) 2925, 1743, 1713, 1453, 1388, 1369, 1208 cm<sup>-1</sup>; <sup>1</sup>H NMR (600 MHz, C<sub>6</sub>D<sub>6</sub>)  $\delta$  7.64 (ddq, *J* = 8.0, 5.8, 2.6 Hz, 4 H), 7.61-7.52 (m, 7 H), 7.52-7.27 (m, 37 H), 7.23 (q, *J* = 7.4 Hz, 10 H), 7.20-7.13 (m, 48 H), 7.10 (dd, *J* = 12.4, 5.7 Hz, 9 H), 7.03 (d, *J* = 7.2 Hz, 2 H), 7.02-6.96 (m, 4 H), 6.93 (dt, *J* = 5.7, 2.8 Hz, 2 H), 6.91-6.83 (m, 8 H), 6.83-6.69 (m, 11 H), 6.68-6.66 (m, 1 H), 5.95 (d, *J* = 5.6 Hz, 3 H), 5.88-5.79 (m, 1 H), 5.76-5.74 (m, 2 H), 5.58-5.55 (m, 3 H), 5.54-5.41 (m, 6 H), 5.30-5.11 (m, 8 H), 5.08 (dd, *J* = 9.2, 5.9 Hz, 3 H), 5.05-4.98 (m, 3 H), 4.90-4.97 (m, 10 H), 4.84-4.56 (m, 25 H), 4.56-4.50 (m, 5 H), 4.46 (dd, *J* = 11.9, 7.4 Hz, 5 H), 4.39-4.33 (m, 8 H), 4.33-4.24 (m, 10 H), 4.14-4.00 (m, 10 H), 3.97-3.89 (m, 4 H), 3.89-3.82 (m, 6 H), 3.79 (s, 6 H), 3.77 (s, 3 H), 3.73-3.63 (m, 5 H), 3.58-3.41 (m, 10 H), 3.41-3.22 (m, 12 H), 3.22-3.04 (m, 5 H), 2.99-2.88 (m, 4 H), 2.87-2.70 (m, 3 H), 2.11 (s, 6 H), 2.08 (s, 6 H), 1.98-1.93 (m, 6 H), 1.93-1.87 (m, 6 H), 1.83-1.80 (m, 3 H), 1.80 (s, 3 H), 1.78 (s, 3 H), 1.75-1.70 (m, 1 H), 1.69 (s, 3 H), 1.68 (s, 3 H), 1.65 (s, 3 H), 1.63 (s, 6 H), 1.62 (s, 6 H); <sup>13</sup>C NMR (150 MHz, C<sub>6</sub>D<sub>6</sub>)  $\delta$  170.71, 170.69, 170.58, 170.56, 170.44, 170.41, 170.39, 170.37, 170.36, 170.31, 170.28, 170.25, 170.23, 170.20, 170.18, 170.16, 170.14, 170.12, 170.08, 170.06, 170.04, 170.01, 169.97, 169.95, 169.93, 169.91, 169.89, 169.83, 169.82, 169.78, 169.74, 169.69, 169.54, 169.50, 169.48, 169.45, 169.43, 169.40, 169.12, 169.09, 169.06, 168.99, 168.98, 168.96, 168.93, 168.90, 168.88, 168.86, 168.83, 168.81, 168.77, 168.76, 168.66, 168.64, 168.31, 168.29, 168.27, 168.25, 167.85, 167.84, 167.82, 167.80, 167.77, 167.74, 167.72, 167.69, 167.64, 167.62, 167.60, 167.58, 167.55, 167.52, 167.49, 167.48, 166.78, 139.89, 139.84, 139.79, 139.76, 139.74, 139.70, 139.68, 139.67, 139.63, 139.58, 139.57, 139.54, 139.53, 139.51, 139.50, 139.49, 139.47, 139.43, 139.39, 139.37, 139.35, 139.32, 139.30, 139.25, 139.22, 139.19, 139.16, 139.14, 139.10, 139.07, 139.05, 139.02, 138.99, 138.98, 138.97, 138.91, 138.85, 138.82, 138.80, 138.78, 138.70, 138.68, 138.05, 138.03, 138.02, 133.51, 133.49, 133.45, 133.43, 133.39, 133.36, 133.34, 133.33, 133.31, 133.28, 133.26, 133.25, 133.24, 133.22, 133.21, 133.18, 133.13, 133.10, 133.08, 132.35, 132.30, 132.27, 132.22, 132.21, 132.19, 132.18, 132.15, 130.77, 130.75, 130.74, 130.72, 130.21, 130.14, 130.13, 130.11, 130.09, 129.31, 129.29, 129.27, 129.26, 129.20, 129.18, 129.16, 129.14, 129.05, 129.01, 128.84, 128.77, 128.71, 128.68, 128.65, 128.62, 128.60, 128.57, 128.53, 128.52, 128.50, 128.49, 128.45, 128.43, 128.40, 128.28, 128.26, 128.10, 128.07, 128.06, 127.94, 127.90, 127.87, 127.74, 127.70, 127.67,

127.65, 127.62, 127.61, 127.59, 127.57, 127.54, 127.50, 127.49, 127.47, 127.44, 127.41, 127.39, 127.38, 127.34, 127.32, 127.28, 127.26, 127.20, 127.18, 127.15, 127.09, 127.07, 127.06, 127.03, 127.00, 126.96, 126.93, 126.91, 126.86, 126.84, 126.83, 126.81, 126.79, 126.78, 126.76, 126.73, 126.69, 126.69, 126.63, 126.61, 126.59, 126.56, 126.53, 126.50, 126.48, 126.46, 126.44, 126.43, 126.41, 126.40, 126.36, 126.34, 126.31, 126.30, 126.28, 126.26, 103.30, 102.81, 102.78, 101.75, 101.70, 100.27, 99.95, 99.87, 99.54, 99.25, 98.37, 97.88, 97.77, 97.66, 80.09, 79.78, 77.87, 77.45, 77.44, 77.42, 77.40, 77.37, 77.35, 77.33, 77.31, 77.29, 77.27, 77.24, 77.21, 77.18, 77.17, 77.15, 77.13, 77.11, 76.50, 76.01, 75.44, 75.39, 75.35, 75.31, 75.26, 75.18, 75.14, 75.13, 75.12, 74.92, 74.90, 74.87, 74.85, 74.83, 74.77, 74.73, 74.70, 74.66, 74.61, 74.60, 74.30, 74.28, 74.13, 74.10, 74.06, 74.02, 73.92, 73.87, 73.84, 73.83, 73.82, 73.80, 73.76, 73.75, 73.63, 73.62, 73.60, 73.59, 73.50, 73.45, 73.40, 73.34, 73.31, 73.29, 73.25, 73.23, 73.18, 73.14, 73.13, 73.08, 73.06, 73.03, 72.97, 72.94, 72.92, 72.90, 72.82, 72.80, 72.79, 72.74, 72.72, 72.70, 72.68, 72.62, 72.60, 72.58, 72.51, 72.48, 72.01, 71.99, 71.97, 71.92, 70.29, 70.27, 69.66, 69.64, 69.62, 69.59, 69.57, 69.55, 69.53, 69.51, 69.49, 69.21, 69.12, 69.09, 69.07, 69.04, 68.72, 68.39, 68.06, 67.98, 67.96, 67.28, 67.27, 67.25, 67.14, 67.12, 67.11, 67.07, 66.10, 66.09, 65.78, 65.73, 62.59, 62.57, 62.54, 62.52, 62.51, 57.25, 57.23, 56.50, 56.48, 56.35, 53.03, 53.02, 52.99, 52.97, 52.95, 48.94, 48.94, 48.88, 48.85, 48.84, 48.81, 48.79, 39.11, 38.65, 38.39, 38.37, 38.33, 38.30, 38.27, 38.24, 38.20, 36.88, 36.78, 36.37, 35.57, 34.62, 33.36, 32.76, 32.29, 32.27, 32.25, 32.23, 32.20, 31.71, 31.31, 30.74, 30.28, 30.19, 30.15, 30.13, 30.09, 30.04, 30.03, 30.01, 29.99, 29.95, 29.93, 29.92, 29.89, 29.88, 29.85, 29.84, 29.78, 29.76, 29.75, 29.74, 29.72, 29.70, 29.68, 29.66, 29.62, 29.59, 29.58, 29.56, 29.54, 29.52, 29.49, 29.46, 29.44, 29.43, 29.40, 29.39, 29.37, 29.35, 29.32, 29.31, 29.29, 29.23, 29.21, 28.96, 28.83, 28.82, 27.67, 27.64, 27.63, 27.61, 27.59, 27.57, 27.55, 27.10, 27.09, 27.06, 26.61, 26.48, 25.90, 25.89, 25.63, 24.07, 23.35, 23.30, 23.08, 23.05, 23.02, 22.97, 22.95, 22.92, 22.90, 22.83, 22.82, 22.66, 22.63, 21.32, 21.29, 21.26, 21.23, 21.21, 20.84, 20.82, 20.81, 20.77, 20.74, 20.72, 20.57, 20.54, 20.52, 20.50, 20.47, 20.42, 20.41, 20.39, 20.34, 20.33, 20.31, 20.27, 20.25, 20.23, 20.20, 19.62, 19.31; MS-ESI  $m/z$  calc for  $C_{340}H_{358}N_8O_{100}Na_2$  3099.15 ( $M+2Na$ )<sup>2+</sup>,  $C_{340}H_{358}N_8O_{100}Na_3$  2073.77 ( $M+3Na$ )<sup>3+</sup>, found 3101.44, 2075.35.

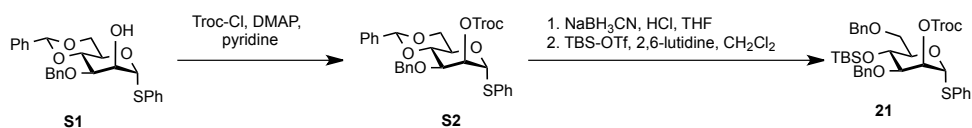

**Thiophenyl 3-*O*-benzyl-4,6-*O*-(*R*)-benzylidene-2-*O*-((2,2,2-trichloroethoxy)carbonyl)- $\alpha$ -D-mannopyranoside (S2).** A solution of thiophenyl 3-*O*-benzyl-4,6-*O*-(*R*)-benzylidene- $\alpha$ -D-mannopyranoside<sup>2</sup> (S1, 0.727 g, 1.61 mmol) in anh. pyridine (20.0 mL) was treated with Troc-Cl (0.653 mL, 4.83 mmol) and DMAP (0.0780 g, 0.644 mmol) and stirred at rt for 24 h. This mixture was quenched with sat.  $NH_4Cl$ , diluted with EtOAc and the organic layer was washed with water, 10%  $CuSO_4$ , brine,

dried (MgSO<sub>4</sub>), and concentrated. Purification by chrom. on SiO<sub>2</sub> (Hexanes:EtOAc, 4:1) afforded **S2** (0.806 g, 80%) as a clear oil:  $[\alpha]_D^{24} +60.4$  (c 0.5, CHCl<sub>3</sub>), IR (ATR) 2868, 1762, 1379, 1246, 1102 cm<sup>-1</sup>; <sup>1</sup>H NMR (500 MHz, CDCl<sub>3</sub>) δ 7.45-7.44 (m, 2 H), 7.39-7.38 (m, 2 H), 7.34-7.24 (m, 11 H), 5.60 (s, 1 H), 5.50 (s, 1 H), 5.42 (d, *J* = 3.1 Hz, 1 H), 4.74-4.65 (m, 4 H), 4.30 (app. quintet, *J* = 5.0 Hz, 1 H), 4.17 (dd, *J* = 8.6, 4.8 Hz, 1 H), 4.12 (d, *J* = 9.6 Hz, 1 H), 3.98 (dd, *J* = 9.8, 3.2 Hz, 1 H), 3.83 (t, *J* = 10.3 Hz, 1 H); <sup>13</sup>C NMR (125 MHz, CDCl<sub>3</sub>) δ 155.0, 139.1, 138.7, 133.6, 130.7, 130.5, 129.8, 129.7, 129.3, 129.1, 127.5, 103.1, 88.1, 79.8, 78.0, 75.5, 74.1, 69.7, 66.7; HRMS (ESI) calc for C<sub>29</sub>H<sub>27</sub>O<sub>7</sub>SCl<sub>3</sub>Na (M+Na) 647.0441, found 647.0436.

**Thiophenyl 3,6-di-*O*-benzyl-4-*O*-(*t*-butyldimethylsilyl)-2-*O*-((2,2,2-trichloroethoxy)carbonyl)- $\alpha$ -D-mannopyranoside (21).** A solution of **S2** (0.526 g, 0.840 mmol) in anh. THF (10.0 mL) was cooled to 0 °C, NaBH<sub>3</sub>CN (0.265 g, 4.20 mmol) was added, followed by a solution of HCl in Et<sub>2</sub>O (4.20 mL, 8.40 mmol, 2.0 M). After 4 h, the mixture was quenched with sat. NaHCO<sub>3</sub>, diluted with EtOAc and the organic layer was washed with water, brine, dried (MgSO<sub>4</sub>), and concentrated. The crude material was dissolved in anh. CH<sub>2</sub>Cl<sub>2</sub> (10.0 mL), 2,6-lutidine (0.0970 mL, 8.40 mmol) was added and the reaction mixture was cooled to 0 °C. TBSOTf (0.578 mL, 2.52 mmol) was introduced *via* syringe and the mixture was stirred at 0 °C for 3 h, carefully quenched with sat. NaHCO<sub>3</sub>, diluted with EtOAc and the organic layer was washed with water (3x), brine, dried (MgSO<sub>4</sub>), and concentrated. Purification by chrom. on SiO<sub>2</sub> (Hexanes:EtOAc, 6:1) afforded **21** (0.370 g, 60%) as a clear oil:  $[\alpha]_D^{24} +66.7$  (c 1.0, CHCl<sub>3</sub>); IR (ATR) 2856, 1741, 1722, 1362, 1105 cm<sup>-1</sup>; <sup>1</sup>H NMR (500 MHz, CDCl<sub>3</sub>) δ 7.54 (dd, *J* = 7.5, 1.4 Hz, 2 H), 7.35-7.30 (m, 8 H), 7.29-7.22 (m, 5 H), 5.58 (d, *J* = 1.4 Hz, 1 H), 5.40 (dd, *J* = 2.8, 1.8 Hz, 1 H), 4.74-4.68 (m, 3 H), 4.58 (s, 2 H), 4.56 (d, *J* = 11.6 Hz, 1 H), 4.35 (ddd, *J* = 8.7, 6.3, 1.6 Hz, 1 H), 4.00 (t, *J* = 9.3 Hz, 1 H), 3.83 (dd, *J* = 10.8, 1.9 Hz, 1 H), 3.77 (dd, *J* = 10.8, 6.4 Hz, 1 H), 3.73 (dd, *J* = 8.9, 3.0 Hz, 1 H), 0.84 (s, 9 H), 0.02 (s, 3 H), 0.00 (s, 3 H); <sup>13</sup>C NMR (125 MHz, CDCl<sub>3</sub>) δ 153.5, 138.3, 137.4, 133.3, 132.3, 129.1, 128.2, 127.9, 127.7 (2), 127.5, 127.4, 94.3, 85.7, 78.5, 76.9, 74.9, 74.1, 73.2, 71.5, 69.4, 68.0, 25.9, 18.1, -3.9, -5.0; HRMS (ESI) calc for C<sub>35</sub>H<sub>43</sub>O<sub>7</sub>SCl<sub>3</sub>SiNa (M+Na) 763.1462, found 763.1458.

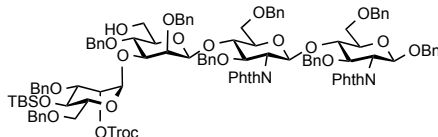

22

**Benzyl [3,6-di-*O*-benzyl-4-*O*-(*t*-butyldimethylsilyl)-2-*O*-((2,2,2-trichloroethoxy)carbonyl)- $\alpha$ -D-mannopyranosyl-(1→3)]-2,4-di-*O*-benzyl- $\beta$ -D-mannopyranosyl-(1→4)-3,6-di-*O*-benzyl-2-deoxy-2-**

**phthalimido- $\beta$ -D-glucopyranosyl-(1 $\rightarrow$ 4)-3,6-di-O-benzyl-2-deoxy-2-phthalimido- $\beta$ -D-**

**glucopyranoside (22).** A mixture of **21** (0.150 g, 0.203 mmol) and acceptor **8** (0.188 g, 0.135 mmol) was azeotropically dried with PhMe and then on high vacuum for 1 h. This mixture was dissolved in anh. CH<sub>2</sub>Cl<sub>2</sub> (2.5 mL), freshly activated 3Å MS (0.30 g) were added and after 1 h, the mixture was cooled to -20 °C, NIS (0.0607 g, 0.270 mmol) was added, followed by a solution of TfOH (0.20 mL, 10% w/v in CH<sub>2</sub>Cl<sub>2</sub>). The reaction mixture was stirred at -20 °C for 2 h, quenched with Et<sub>3</sub>N, filtered, washed with sat. NaHCO<sub>3</sub>, sat. Na<sub>2</sub>S<sub>2</sub>O<sub>3</sub>, water, brine, dried (MgSO<sub>4</sub>), and concentrated. Purification by chrom. on SiO<sub>2</sub> (Hexanes:EtOAc, 2:1) afforded crude tetrasaccharide (0.185 g, 68%). This material was cooled to 0 °C, a solution of BH<sub>3</sub>·THF (0.91 mL, 0.91 mmol 1.0 M in THF) was added, followed by a solution of *n*-Bu<sub>2</sub>BOTf (0.30 mL, 0.30 mmol, 1.0 M in CH<sub>2</sub>Cl<sub>2</sub>). After 4 h at this temperature, the mixture was quenched with Et<sub>3</sub>N, and methanol was added. The volatiles were removed *in vacuo* and the mixture was concentrated from methanol two more times. The crude oil was purified by chrom. on SiO<sub>2</sub> (Hexanes:EtOAc, 3:1 to 2:1 to 1:1) to afford **22** (0.146 g, 53%) as a clear oil: [ $\alpha$ ]<sub>D</sub><sup>24</sup> -5.5 (c 1.0, CHCl<sub>3</sub>); IR (ATR) 2863, 1775, 1716, 1388 cm<sup>-1</sup>; <sup>1</sup>H NMR (600 MHz, CDCl<sub>3</sub>)  $\delta$  7.94 (d, *J* = 7.0 Hz, 1 H), 7.78-7.77 (m, 2 H), 7.74 (br s, 2 H), 7.68 (br s, 2 H), 7.49 (d, *J* = 7.4, 3 H), 7.42-7.23 (m, 28 H), 7.25-7.23 (m, 1 H), 7.10-7.08 (m, 1 H), 7.05-7.00 (m, 5 H), 6.98-6.95 (m, 6 H), 6.79-6.76 (m, 3 H), 5.34 (d, *J* = 8.2 Hz, 1 H), 5.39-5.25 (m, 2 H), 5.10 (m, *J* = 12.0 Hz, 1 H), 5.03 (d, *J* = 12.2 Hz, 1 H), 5.00 (d, *J* = 8.3 Hz, 1 H), 4.89 (d, *J* = 12.0, 8.3 Hz, 2 H), 4.73 (dd, *J* = 12.4, 7.3 Hz, 2 H), 4.71 (d, *J* = 2.4 Hz, 2 H), 4.69-4.62 (m, 3 H), 4.59-4.51 (m, 5 H), 4.49-4.40 (m, 3 H), 4.49-4.45 (m, 3 H), 4.39-4.32 (m, 1 H), 4.30-4.22 (m, 3 H), 4.20-4.17 (m, 1 H), 4.09 (t, *J* = 8.8 Hz, 1 H), 4.00 (t, *J* = 8.2 Hz, 1 H), 3.90 (t, *J* = 9.0 Hz, 1 H), 3.84 (t, *J* = 9.6 Hz, 1 H), 3.80-3.77 (m, 2 H), 3.70-3.64 (m, 4 H), 3.61 (d, *J* = 10.2 Hz, 1 H), 3.51-3.42 (m, 3 H), 3.37 (dd, *J* = 9.7, 3.1 Hz, 1 H), 3.27 (d, *J* = 9.8 Hz, 1 H), 3.11 (ddd, *J* = 7.5, 4.8, 2.5 Hz, 1 H), 0.82 (s, 9 H), 0.00 (s, 6 H); <sup>13</sup>C NMR (150 MHz, CDCl<sub>3</sub>)  $\delta$  168.5, 167.6, 153.5, 138.9, 138.6, 138.4, 138.0, 137.8, 137.6, 137.1, 133.4, 131.6, 128.5, 128.4 (2), 128.3 (2), 128.2, 128.1 (2), 128.0 (2), 127.9, 127.8, 127.7 (2), 127.6 (3), 127.5 (2), 127.4 (2), 127.3 (2), 127.0 (2), 126.8, 123.7, 123.1, 100.8, 99.3, 97.1 (2), 94.2, 81.2, 78.4, 78.2, 77.8, 76.9 (2), 76.6, 75.4, 75.0, 74.8 (2), 74.7 (2), 74.5, 74.4, 74.3, 73.9, 73.4 (2), 73.1, 72.7, 71.5, 70.4, 69.7, 68.1, 67.8, 67.4, 61.9, 56.5, 55.7, 25.9, 18.0, -4.0, -5.1; HRMS (ESI) calc for C<sub>112</sub>H<sub>117</sub>N<sub>2</sub>O<sub>25</sub>SiCl<sub>3</sub>Na (M+Na) 2045.6678, found 2045.6676.

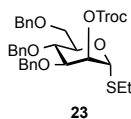

**Thioethyl 3,4,6-tri-O-benzyl-2-O-((2,2,2-trichloroethoxy)carbonyl)- $\alpha$ -D-mannopyranoside (23).** A solution of thioethyl 3,4,6-tri-O-benzyl- $\alpha$ -D-mannopyranoside<sup>2</sup> (0.440 g, 0.890 mmol) in anh. CH<sub>2</sub>Cl<sub>2</sub>



(5.0 mL) was treated with anh. pyridine (0.36 mL) and Troc-Cl (0.37 mL). After 2 h at rt, the mixture was quenched with sat. NH<sub>4</sub>Cl, extracted (3 x 20 mL) with EtOAc and the combined organic layers were washed with water, sat. CuSO<sub>4</sub>, brine, dried (MgSO<sub>4</sub>), and concentrated. Purification by chrom. on SiO<sub>2</sub> (Hexanes:EtOAc, 6:1 to 4:1) afforded **23** (0.510 g, 86%) as a clear oil:  $[\alpha]_D^{22} +56.5$  (c 1.0, CHCl<sub>3</sub>); IR (ATR) 2953, 2929, 1761, 1247, 1100 cm<sup>-1</sup>; <sup>1</sup>H NMR (600 MHz, CD<sub>3</sub>CN)  $\delta$  7.34-7.25 (m, 13 H), 7.22-7.20 (m, 2 H), 5.43 (d,  $J = 1.1$  Hz, 1 H), 5.23 (dd,  $J = 3.2, 1.6$  Hz, 1 H), 4.67 (d,  $J = 11.5$  Hz, 1 H), 4.55 (t,  $J = 11.5$  Hz, 2 H), 4.52 (d,  $J = 11.0$  Hz, 1 H), 4.46 (d,  $J = 11.9$  Hz, 1 H), 4.04 (ddd,  $J = 9.8, 4.4, 1.6$  Hz, 1 H), 3.85 (dd,  $J = 9.4, 3.3$  Hz, 1 H), 3.77 (d,  $J = 9.7$  Hz, 1 H), 3.75 (d,  $J = 4.6$  Hz, 1 H), 3.73 (d,  $J = 4.5$  Hz, 1 H), 3.63 (dd,  $J = 11.0, 1.7$  Hz, 1 H), 2.65 (dq,  $J = 13.1, 7.4$  Hz, 1 H), 2.58 (dq,  $J = 13.1, 7.4$  Hz, 1 H), 1.24 (t,  $J = 7.4$  Hz, 3 H); <sup>13</sup>C NMR (150 MHz, CD<sub>3</sub>CN)  $\delta$  154.3, 139.6, 139.4, 138.9, 129.3, 129.2, 129.1, 129.0, 128.8 (2), 128.6, 128.5, 95.4, 82.3, 79.1, 77.6, 76.6, 75.8, 75.3, 73.9, 72.7, 72.5, 69.7, 26.0, 15.2; HRMS (ESI) calc for C<sub>32</sub>H<sub>35</sub>O<sub>7</sub>SCl<sub>3</sub>Na (M+Na) 691.1067, found 691.1055.

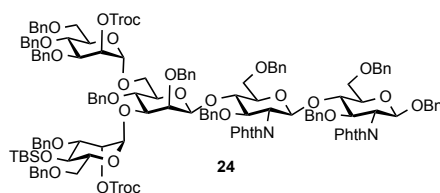

**Benzyl [3,6-di-O-benzyl-4-O-(*t*-butyldimethylsilyl)-2-O-((2,2,2-trichloroethoxy)carbonyl)- $\alpha$ -D-mannopyranosyl-(1 $\rightarrow$ 3)]-[3,4,6-tri-O-benzyl-2-O-((2,2,2-trichloroethoxy)carbonyl)- $\alpha$ -D-mannopyranosyl-(1 $\rightarrow$ 6)]-2,4-di-O-benzyl- $\beta$ -D-mannopyranosyl-(1 $\rightarrow$ 4)-3,6-di-O-benzyl-2-deoxy-2-phthalimido- $\beta$ -D-glucopyranosyl-(1 $\rightarrow$ 4)-3,6-di-O-benzyl-2-deoxy-2-phthalimido- $\beta$ -D-glucopyranoside (**24**).** A mixture of **23** (0.0965 g, 0.144 mmol) and **21** (0.146 g, 0.0721 mmol) was azeotropically dried with PhMe (3 x 5 mL) and then on high vacuum for 1 h. This mixture was dissolved in anh. CH<sub>2</sub>Cl<sub>2</sub> (1.80 mL), freshly activated 3Å MS (0.10 g) were added and after 1 h at rt, the reaction mixture was cooled to -20 °C, NIS (0.0486 g, 0.216 mmol) was added, followed by AgOTf (9.30 mg, 0.0361 mmol). After 3 h at -20 °C, the reaction was quenched with Et<sub>3</sub>N, filtered through a pad of Celite, washed with sat. Na<sub>2</sub>S<sub>2</sub>O<sub>3</sub>, sat. NaHCO<sub>3</sub>, water, brine, dried (MgSO<sub>4</sub>), and concentrated. Purification by chrom. on SiO<sub>2</sub> (Hexanes:EtOAc, 3:1 to 2:1) afforded **24** (0.147 g, 78%) as a clear oil:  $[\alpha]_D^{22} +7.2$  (c 1.0, CHCl<sub>3</sub>); IR (ATR) 3063, 2864, 1763, 1716, 1389, 1250, 1076 cm<sup>-1</sup>; <sup>1</sup>H NMR (600 MHz, CD<sub>3</sub>CN)  $\delta$  7.84-7.76 (m, 4 H), 7.69-7.65 (m, 2 H), 7.55-7.53 (m, 2 H), 7.45-7.24 (m, 40 H), 7.21-7.17 (m, 3 H), 7.15-7.11 (m, 1 H), 7.06-7.03 (m, 3 H), 7.01-7.00 (m, 3 H), 6.96-6.92 (m, 4 H), 6.89-6.86 (m, 1 H), 6.84-6.77 (m, 4 H), 6.75-6.73 (m, 1 H), 5.49 (br s, 1 H), 5.35-5.30 (m, 1 H), 5.25-5.17 (m, 2 H), 5.14 (dd,  $J = 3.1, 1.9$  Hz, 1 H), 5.00 (dd,  $J = 10.3, 8.7$  Hz, 1 H), 4.90-4.82 (m, 5 H), 4.80-4.76 (m, 1 H), 4.74-4.69 (m, 2 H), 4.68-

4.63 (m, 3 H), 4.62-4.57 (m, 6 H), 4.54-4.47 (m, 5 H), 4.46-4.39 (m, 5 H), 4.31 (d,  $J = 11.3$  Hz, 1 H), 4.26 (dd,  $J = 10.6, 8.5$  Hz, 1 H), 4.19 (dd,  $J = 7.4, 1.0$  Hz, 1 H), 4.16-4.09 (m, 4 H), 4.07-4.02 (m, 2 H), 3.96-3.91 (m, 2 H), 3.88-3.83 (m, 3 H), 3.80-3.75 (m, 3 H), 3.74-3.70 (m, 4 H), 3.64-3.61 (m, 3 H), 3.56-3.53 (m, 2 H), 3.42 (dd,  $J = 10.9, 3.8$  Hz, 1 H), 3.36-3.34 (m, 1 H), 3.30-3.27 (m, 1 H), 0.84 (s, 9 H), 0.04 (s, 3 H), 0.00 (s, 3 H);  $^{13}\text{C}$  NMR (150 MHz,  $\text{CD}_3\text{CN}$ )  $\delta$  167.3, 152.9, 152.8, 138.3, 138.1, 137.6, 137.0, 133.8, 131.0, 128.1 (2), 128.0 (4), 127.9 (2), 127.8 (2), 127.6 (3), 127.5 (2), 127.4, 127.3 (2), 127.2, 127.1, 127.0, 126.9, 126.8, 122.7, 98.3, 96.9, 94.0 (2), 78.2, 77.7, 76.6, 76.4, 76.3, 76.1, 76.0, 74.4, 74.1, 74.0, 73.9, 73.8, 73.6, 73.3, 73.2, 72.9, 72.7, 72.6, 72.5, 72.4, 72.0, 70.8, 70.7, 70.2, 67.2, 64.6, 55.4, 25.0, 17.4, -4.2; HRMS (ESI) calc for  $\text{C}_{142}\text{H}_{146}\text{N}_2\text{O}_{32}\text{Cl}_6\text{SiNa}$  ( $\text{M}+\text{Na}$ ) 2651.7657, found 2651.7622.

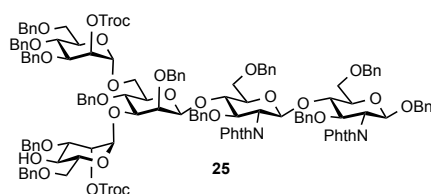

**Benzyl [3,6-di-*O*-benzyl-2-*O*-((2,2,2-trichloroethoxy)carbonyl)- $\alpha$ -D-mannopyranosyl-(1 $\rightarrow$ 3)]-[3,4,6-tri-*O*-benzyl-2-*O*-((2,2,2-trichloroethoxy)carbonyl)- $\alpha$ -D-mannopyranosyl-(1 $\rightarrow$ 6)]-2,4-di-*O*-benzyl- $\beta$ -D-mannopyranosyl-(1 $\rightarrow$ 4)-3,6-di-*O*-benzyl-2-deoxy-2-phthalimido- $\beta$ -D-glucopyranosyl-(1 $\rightarrow$ 4)-3,6-di-*O*-benzyl-2-deoxy-2-phthalimido- $\beta$ -D-glucopyranoside (**25**).** A solution of **24** (0.140 g, 0.0531 mmol) in anh. THF (1.0 mL) and pyridine (0.50 mL) was treated with HF/pyridine (0.50 mL, 70% in pyridine) and stirred at rt for 44 h. The reaction mixture was quenched with sat.  $\text{NaHCO}_3$ , extracted with EtOAc and the combined organic layers were washed with water, sat.  $\text{CuSO}_4$ , brine, dried ( $\text{MgSO}_4$ ), and concentrated. Purification by chrom. on  $\text{SiO}_2$  (Hexanes:EtOAc, 2:1 to 1:1) afforded **25** (0.0776 g, 58%) as a clear oil:  $[\alpha]_D^{22} +5.9$  (c 1.0,  $\text{CHCl}_3$ ); IR (ATR) 3476, 3030, 2925, 2871, 1763, 1714, 1388, 1250, 1075  $\text{cm}^{-1}$ ;  $^1\text{H}$  NMR (500 MHz,  $\text{CDCl}_3$ )  $\delta$  7.05 (d,  $J = 7.1$  Hz, 1 H), 7.62 (t,  $J = 7.0$  Hz, 1 H), 7.56-7.51 (m, 4 H), 7.45 (d,  $J = 6.9$  Hz, 1 H), 7.39-7.34 (m, 3 H), 7.25-7.11 (m, 41 H), 7.09-7.05 (m, 2 H), 7.00-6.99 (m, 1 H), 6.97-6.94 (m, 1 H), 6.91-6.83 (m, 5 H), 6.80-6.78 (m, 2 H), 6.73-6.69 (m, 1 H), 6.66-6.56 (m, 4 H), 6.51 (t,  $J = 7.5$  Hz, 1 H), 5.19 (br s, 1 H), 5.15-5.13 (m, 2 H), 5.07-5.06 (d,  $J = 1.9$  Hz, 1 H), 4.99-4.95 (m, 1 H), 4.88-4.81 (m, 2 H), 4.76-4.67 (m, 4 H), 4.64-4.57 (m, 4 H), 4.54-4.48 (m, 3 H), 4.45-4.30 (m, 12 H), 4.28-4.24 (m, 3 H), 4.21-4.19 (m, 1 H), 4.12-3.96 (m, 6 H), 3.87-3.71 (m, 9 H), 3.61-3.48 (m, 5 H), 3.44-3.40 (m, 2 H), 3.37-3.27 (m, 2 H), 3.19-3.17 (m, 1 H), 3.05 (d,  $J = 9.5$  Hz, 1 H);  $^{13}\text{C}$  NMR (150 MHz,  $\text{CD}_3\text{CN}$ )  $\delta$  167.3, 153.0, 139.1, 138.4, 138.3 (2), 138.2, 137.8, 137.0, 133.8, 131.0, 128.2, 128.1, 128.0 (3), 127.9 (3), 127.8, 127.7 (2), 127.6 (4), 127.5 (3), 127.4 (2), 127.3 (2), 127.1 (2), 127.0, 126.9 (2), 126.8 (2), 126.7, 122.7, 99.1, 96.9 (2), 96.3, 93.9, 76.9, 76.3, 76.1 (2), 75.9, 75.6, 75.5, 75.1, 74.4,

74.3, 74.2, 74.0, 73.9, 73.8, 73.6, 73.3, 73.0, 72.9, 72.8 (2), 72.7, 72.6, 72.5, 72.4, 72.0, 71.6, 71.5, 71.2, 70.8, 70.2, 68.8, 68.3, 67.8, 66.1, 56.1, 55.4; HRMS (ESI) calc for C<sub>138</sub>H<sub>132</sub>N<sub>2</sub>O<sub>32</sub>Cl<sub>6</sub>Na (M+Na) 2537.6792, found 2537.6879.

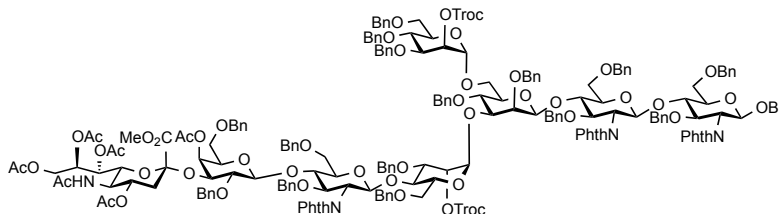

26

**Benzyl [3,6-di-*O*-benzyl-4-(methyl [5-acetamido-4,7,8,9-tetra-*O*-acetyl-3,5-dideoxy-*D*-glycero- $\beta$ -*D*-galacto-non-2-ulopyranosylate]-(2 $\rightarrow$ 3)-2,6-di-*O*-benzyl- $\beta$ -*D*-galactopyranosyl-(1 $\rightarrow$ 4)-3,6-di-*O*-benzyl-2-deoxy-2-phthalimido- $\beta$ -*D*-glucopyranosyl)-2-*O*-((2,2,2-trichloroethoxy)carbonyl)- $\alpha$ -*D*-mannopyranosyl-(1 $\rightarrow$ 3)]-[3,4,6-tri-*O*-benzyl-2-*O*-((2,2,2-trichloroethoxy)carbonyl)- $\alpha$ -*D*-mannopyranosyl-(1 $\rightarrow$ 6)]-2,4-di-*O*-benzyl- $\beta$ -*D*-mannopyranosyl-(1 $\rightarrow$ 4)-3,6-di-*O*-benzyl-2-deoxy-2-phthalimido- $\beta$ -*D*-glucopyranosyl-(1 $\rightarrow$ 4)-3,6-di-*O*-benzyl-2-deoxy-2-phthalimido- $\beta$ -*D*-glucopyranoside (26).** A mixture of acceptor **25** (0.0440 g, 0.0175 mmol) and donor **15** (0.122 g, 0.0875 mmol) was azeotropically dried with PhMe (3 x 5 mL) and then on high vacuum for 12 h. This mixture was dissolved in distilled CH<sub>2</sub>Cl<sub>2</sub> (0.35 mL), freshly activated 3Å MS (0.10 g) were added and after 1 h at rt, this mixture was cooled to -20 °C, NIS (0.0295 g, 0.131 mmol) was added, followed by AgOTf (0.0225 g, 0.0175 mmol). After 36 h at this temperature, the reaction mixture was quenched with Et<sub>3</sub>N, filtered through a pad of Celite, and the combined organic layers were washed with sat. Na<sub>2</sub>S<sub>2</sub>O<sub>3</sub>, sat. NaHCO<sub>3</sub>, water, brine, dried (MgSO<sub>4</sub>), and concentrated. Purification by chrom. on SiO<sub>2</sub> (EtOAc then PhMe:MeCN, 2:1 to 1:1) afforded **26** (0.0402 g, 60%) as a clear oil:  $[\alpha]_D^{24} +10.7$  (c 1.0, CHCl<sub>3</sub>); IR (ATR) 2874, 1745, 1715, 1388, 1224, 1040 cm<sup>-1</sup>; <sup>1</sup>H NMR (600 MHz, CD<sub>3</sub>CN)  $\delta$  7.85-7.75 (m, 5 H), 7.72 (s, 4 H), 7.64 (s, 3 H), 7.45 (dd, *J* = 7.5, 5.5 Hz, 2 H), 7.42-7.37 (m, 3 H), 7.37-7.31 (m, 14 H), 7.31-7.24 (m, 23 H), 7.24-7.20 (m, 9 H), 7.20-7.16 (m, 6 H), 7.16-7.08 (m, 6 H), 7.02 (dd, *J* = 8.3, 7.1 Hz, 2 H), 7.00 – 6.96 (m, 3 H), 6.94-6.87 (m, 5 H), 6.87-6.83 (m, 1 H), 6.83-6.79 (m, 2 H), 6.79-6.77 (m, 1 H), 6.77-6.72 (m, 2 H), 6.70 (dd, *J* = 8.5, 6.6 Hz, 1 H), 6.08 (d, *J* = 9.9 Hz, 1 H), 5.51 (ddd, *J* = 8.2, 5.4, 2.8 Hz, 1 H), 5.46 (t, *J* = 8.7 Hz, 1 H), 5.29 (dd, *J* = 8.1, 2.1 Hz, 1 H), 5.26 (d, *J* = 8.4 Hz, 1 H), 5.12 (dd, *J* = 8.3, 2.8 Hz, 1 H), 5.10-5.03 (m, 1 H), 4.95-4.91 (m, 2 H), 4.91-4.85 (m, 2 H), 4.85-4.80 (m, 1 H), 4.80-4.77 (m, 1 H), 4.75 (d, *J* = 9.0 Hz, 1 H), 4.74-4.71 (m, 2 H), 4.69 (ddd, *J* = 11.3, 5.1, 3.4 Hz, 1 H), 4.64 (ddd, *J* = 11.9, 5.0, 3.7 Hz, 3 H), 4.60 (d, *J* = 4.2 Hz, 1 H), 4.59-4.53 (m, 3 H), 4.50 (ddd, *J* = 11.3, 7.0, 3.1 Hz, 4 H), 4.47-4.40 (m, 6 H), 4.40-4.33 (m, 4 H), 4.33-4.27 (m, 2 H), 4.25 (d, *J* = 12.8 Hz, 1 H), 4.23-

4.19 (m, 1 H), 4.19-4.16 (m, 1 H), 4.16-4.11 (m, 2 H), 4.11-4.08 (m, 1 H), 4.07 (t,  $J = 5.4$  Hz, 2 H), 4.06-3.98 (m, 3 H), 3.97-3.89 (m, 3 H), 3.83 (ddd,  $J = 12.0, 8.6, 2.9$  Hz, 2 H), 3.80 (s, 3 H), 3.78-3.70 (m, 2 H), 3.67 (d,  $J = 3.4$  Hz, 1 H), 3.66-3.58 (m, 4 H), 3.58-3.47 (m, 4 H), 3.47-3.34 (m, 4 H), 3.32 (d,  $J = 7.8$  Hz, 1 H), 3.22-3.15 (m, 1 H), 2.50 (dd,  $J = 12.5, 4.4$  Hz, 1 H), 2.04 (s, 3 H), 1.99 (d,  $J = 7.4$  Hz, 1 H), 1.95 (s, 3 H), 1.93 (s, 3 H), 1.92 (s, 3 H), 1.89 (s, 3 H), 1.78 (s, 3 H);  $^{13}\text{C}$  NMR (150 MHz,  $\text{CD}_3\text{CN}$ )  $\delta$  178.0 (2), 169.6, 169.5, 169.4 (2), 169.2, 167.8, 167.3 (2), 152.8, 139.0, 138.8, 138.4, 138.3 (2), 138.1, 138.0 (2), 137.9, 137.4, 137.0, 133.8, 131.0, 128.6, 128.1 (2), 128.0 (5), 127.9, 127.9 (4), 127.8, 127.8 (3), 127.7, 127.6 (4), 127.5 (3), 127.4 (2), 127.3 (3), 127.2 (3), 127.1 (2), 127.0 (4), 126.9 (2), 126.7, 126.5, 126.4, 124.9, 122.9, 122.7, 101.5, 101.1, 98.3, 98.1, 97.4, 96.9, 96.6, 94.1, 94.0, 93.9, 78.3, 77.9, 76.6, 76.2, 76.1, 75.9, 74.8, 74.3, 74.3, 74.2, 74.0, 74.0, 73.9, 73.8, 73.7, 73.5, 72.9, 72.5 (3), 72.3, 72.0, 71.7, 71.1, 70.7, 70.2, 69.2, 69.0, 68.4, 67.9, 67.1, 66.1, 61.6, 55.4, 52.2, 48.1, 36.5, 29.0, 21.8, 20.2, 20.1, 19.8, 19.8, 19.7, 19.5; MS-ESI  $m/z$  calc for  $\text{C}_{206}\text{H}_{208}\text{Cl}_6\text{N}_4\text{O}_{56}\text{Na}$  ( $\text{M}+\text{Na}$ ) $^+$  3866.16, found 3868.85;  $\text{C}_{206}\text{H}_{208}\text{Cl}_6\text{N}_4\text{O}_{56}\text{Na}_2$  ( $\text{M}+2\text{Na}$ ) $^{2+}$  calc 1944.58, found 1947.06.

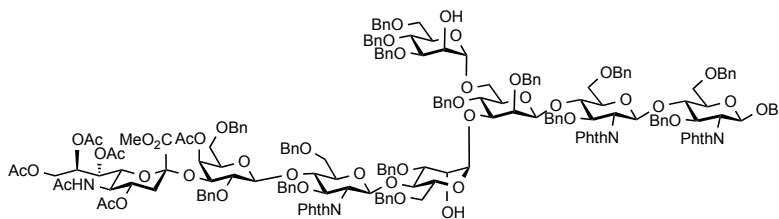

27

**Benzyl [3,6-di-*O*-benzyl-4-(methyl [5-acetamido-4,7,8,9-tetra-*O*-acetyl-3,5-dideoxy-*D*-glycero- $\beta$ -*D*-galacto-non-2-ulopyranosylate]-(2 $\rightarrow$ 3)-2,6-di-*O*-benzyl- $\beta$ -*D*-galactopyranosyl-(1 $\rightarrow$ 4)-3,6-di-*O*-benzyl-2-deoxy-2-phthalimido- $\beta$ -*D*-glucopyranosyl)- $\alpha$ -*D*-mannopyranosyl-(1 $\rightarrow$ 3)]-[3,4,6-tri-*O*-benzyl- $\alpha$ -*D*-mannopyranosyl-(1 $\rightarrow$ 6)]-2,4-di-*O*-benzyl- $\beta$ -*D*-mannopyranosyl-(1 $\rightarrow$ 4)-3,6-di-*O*-benzyl-2-deoxy-2-phthalimido- $\beta$ -*D*-glucopyranosyl-(1 $\rightarrow$ 4)-3,6-di-*O*-benzyl-2-deoxy-2-phthalimido- $\beta$ -*D*-glucopyranoside (27).** A solution of **26** (0.0370 g, 0.00960 mmol) in anh. THF (1.0 mL) was treated with AcOH (0.50 mL) and nano-Zn (12.5 mg, 1.91 mmol). After 20 min of stirring at rt, the mixture was filtered through a pad of Celite, concentrated and purified by chrom. on  $\text{SiO}_2$  (PhMe:MeCN, 1:1) to provide **27** (28.7 mg, 85%) as a clear oil:  $^1\text{H}$  NMR (600 MHz,  $\text{CD}_3\text{CN}$ )  $\delta$  7.66 (dd,  $J = 5.5, 2.8$  Hz, 2 H), 7.59 (s, 3 H), 7.56-7.48 (m, 4 H), 7.38-7.33 (m, 2 H), 7.29 (t,  $J = 7.6$  Hz, 3 H), 7.26-7.20 (m, 12 H), 7.20-7.04 (m, 41 H), 7.04-6.94 (m, 7 H), 6.94-6.84 (m, 6 H), 6.84-6.75 (m, 6 H), 6.75-6.64 (m, 4 H), 6.61 (dd,  $J = 9.2, 6.4$  Hz, 1 H), 5.98 (d,  $J = 9.9$  Hz, 1 H), 5.41 (ddd,  $J = 8.5, 5.6, 2.9$  Hz, 1 H), 5.18 (dd,  $J = 8.0, 2.3$  Hz, 1 H), 5.15 (d,  $J = 8.9$  Hz, 1 H), 4.88-4.66 (m, 9 H), 4.66-4.50 (m, 6 H), 4.50-4.41 (m, 7 H), 4.41-4.22 (m, 20 H), 4.22-4.13 (m, 4 H), 4.13-4.00 (m, 4 H), 4.00-3.85 (m, 8 H), 3.76-3.71 (m, 2 H), 3.68 (s, 3 H),

3.68-3.65 (m, 1 H), 3.64-3.58 (m, 3 H), 3.58-3.46 (m, 6 H), 3.46-3.33 (m, 7 H), 3.33-3.16 (m, 8 H), 3.12-2.96 (m, 3 H), 2.42-2.35 (m, 1 H), 1.93 (s, 3 H), 1.89 (s, 1 H), 1.84 (s, 3 H), 1.82-1.80 (m, 6 H), 1.78 (d,  $J = 2.3$  Hz, 3 H), 1.66 (s, 3 H); MS-ESI  $m/z$  calc for  $C_{200}H_{206}N_4O_{52}Na_2$  ( $M+2Na$ ) $^{2+}$  1771.88, found 1772.34.

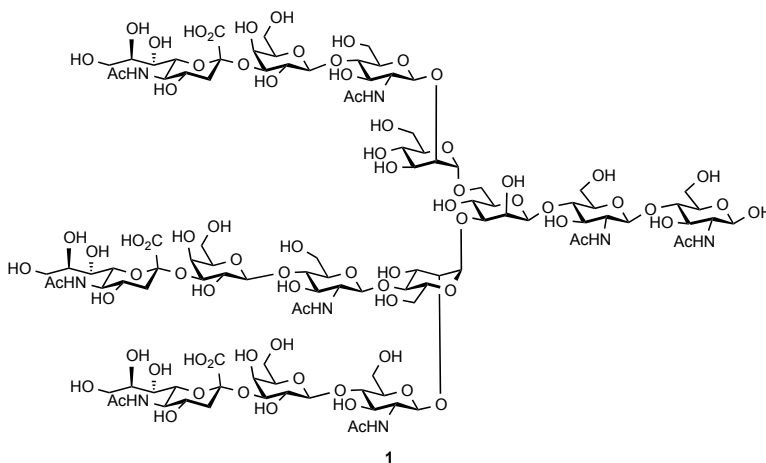

**[2,4-Bis[5-acetamido-3,5-dideoxy-D-glycero-β-D-galacto-non-2-ulopyranosylate]-(2→3-β-D-galactopyranosyl-(1→4)-2-acetamido-2-deoxy-β-D-glucopyranosyl]-α-D-mannopyranosyl-(1→3)]-[2-[5-acetamido-3,5-dideoxy-D-glycero-β-D-galacto-non-2-ulopyranosylate]-(2→3)-β-D-galactopyranosyl-(1→4)]-2-acetamido-2-deoxy-β-D-glucopyranosyl]-α-D-mannopyranosyl-(1→6)]-β-D-mannopyranosyl-(1→4)-2-acetamido-2-deoxy-β-D-glucopyranosyl-(1→4)-2-acetamido-2-deoxy-D-glucopyranoside (1).** A solution of **20** (30.0 mg, 0.00487 mmol) in anh.  $CH_2Cl_2$  (1.1 mL) and MeOH (1.1 mL) was treated at rt with NaOMe (0.25 mL, 0.125 mmol, 0.5 M in MeOH) and stirred at rt for 12 h. The reaction mixture was cooled to 0 °C,  $H_2O$  (0.21 mL) was introduced and the mixture was allowed to warm up to rt, stirred at this temp. for 8 h, cooled to 0 °C and quenched with DOWEX-MAC3 resin until pH was adjusted to 6. The mixture was then filtered and concentrated to provide triacid: ESI  $m/z$  calc for ( $M+3Cl$ ) $^{3-}$  1861.7, found 1864.8.

The crude mixture was dissolved in PhMe (0.50 mL), *n*-BuOH (4.3 mL), and 1,2-ethylenediamine (2.3 mL) and heated at 90 °C for 12 h. The volatiles were removed *in vacuo* and the crude material was dissolved in PhMe (1.0 mL), heated at 90 °C for 24 h and concentrated to provide triamine: ESI  $m/z$  calc for ( $M-H+Cl$ ) $^{2-}$  2432.1, ( $M-3H$ ) $^{3-}$  1609.0, found 2427.2, 1610.1.

The crude mixture from above was dissolved in MeOH (1.40 mL),  $Et_3N$  (0.140 mL) was added and  $Ac_2O$  (89.6 μL) was introduced *via* syringe. After 2 h at rt, this mixture was loaded directly onto a column packed with Sephadex LH-20, eluted with MeOH/ $CH_2Cl_2$  (1:1), and concentrated to afford **28** as a clear, colorless oil: ESI  $m/z$  calc for ( $M-2H$ ) $^{2-}$  2519.1, ( $M-3H$ ) $^{3-}$  1679.0, found 2520.5, 1679.9.

A three-neck flask equipped with a Dewar condenser was cooled to -78 °C, charged with pre-dried (Na) liquid ammonia (10.0 mL), anhydrous THF (0.50 mL), and sodium was added (0.108 g). The mixture was stirred for ca. 1 h and a suspension of crude oligosaccharide in THF (0.50 + 0.50 mL) was added to the blue solution. After 6 h at -78 °C, this mixture was quenched with NH<sub>4</sub>Cl (0.250 g), allowed to warm up to rt and the volatiles were removed overnight by a stream of nitrogen. This mixture was dissolved in water and purified by gravity filtration on BioGel P2 to provide **1** (1.5 mg, 11%) as a white solid: <sup>1</sup>H NMR (500 MHz, CD<sub>3</sub>OD) δ representative signals 2.77-2.73 (m, 3 H), 1.92-1.91 (m, 6 H), 1.73-1.68 (m, 9 H), 1.64-1.62 (m, 6 H); ESI *m/z* calc for C<sub>109</sub>H<sub>176</sub>N<sub>8</sub>O<sub>80</sub>Cl (M+Cl-2H)<sup>3-</sup> 970.67, found 970.04.

#### References:

1. Fulmer, G. R.; Miller, A. J. M.; Sherden, N. H.; Gottlieb, H. E.; Nudelman, A.; Stoltz, B. M.; Bercaw, J. E.; Goldberg, K. I., *Organometallics* **2010**, *29*, 2176.
2. Dudkin, V. Y.; Miller, J. S.; Dudkina, A. S.; Antczak, C.; Scheinberg, D. A.; Danishefsky, S. J., *J. Am. Chem. Soc.* **2008**, *130*, 13598.

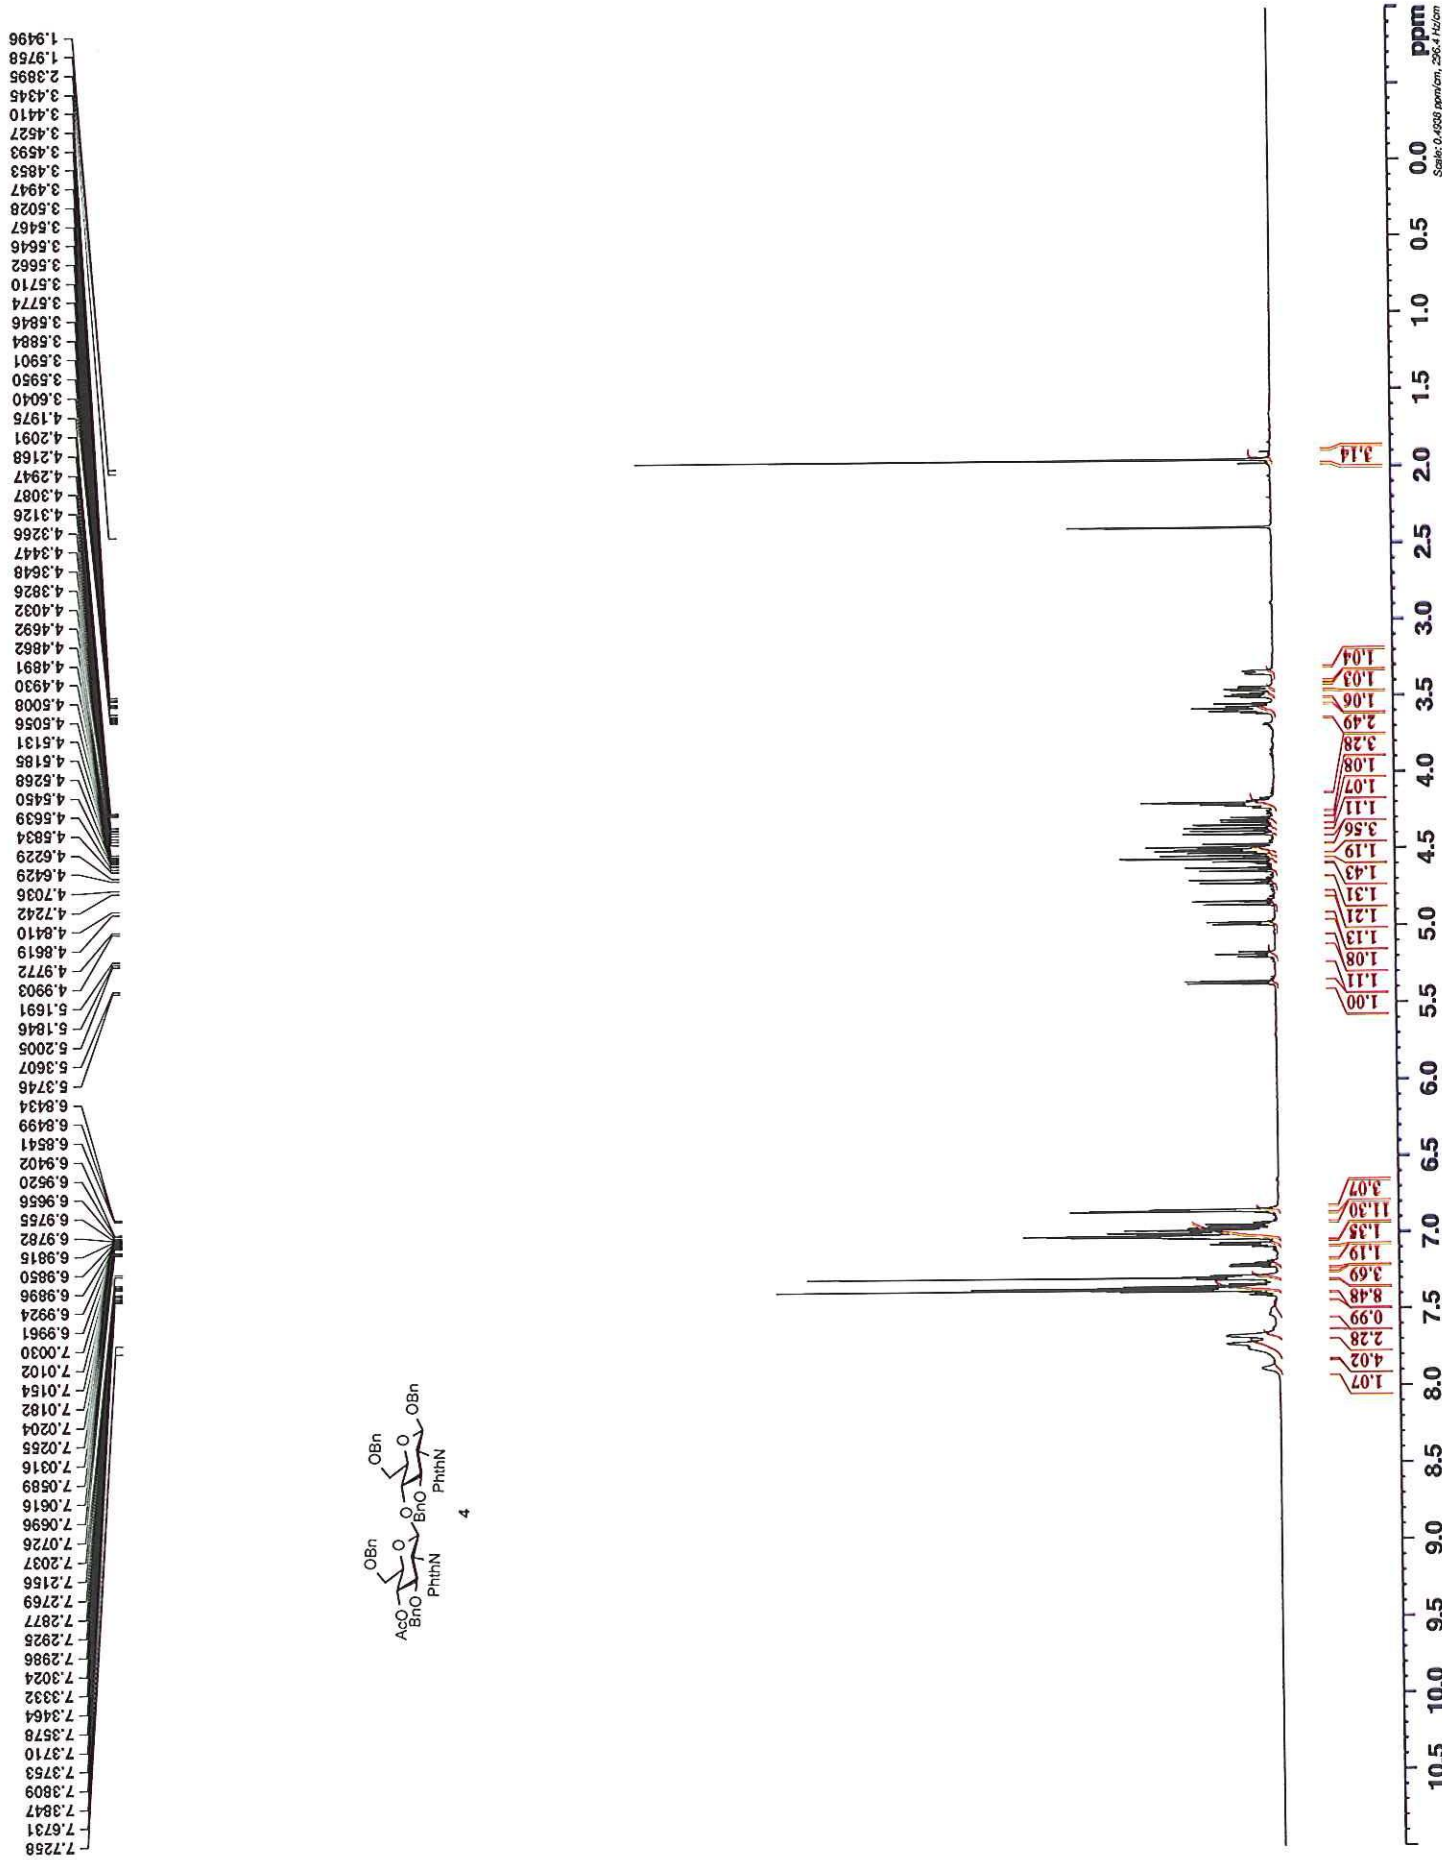

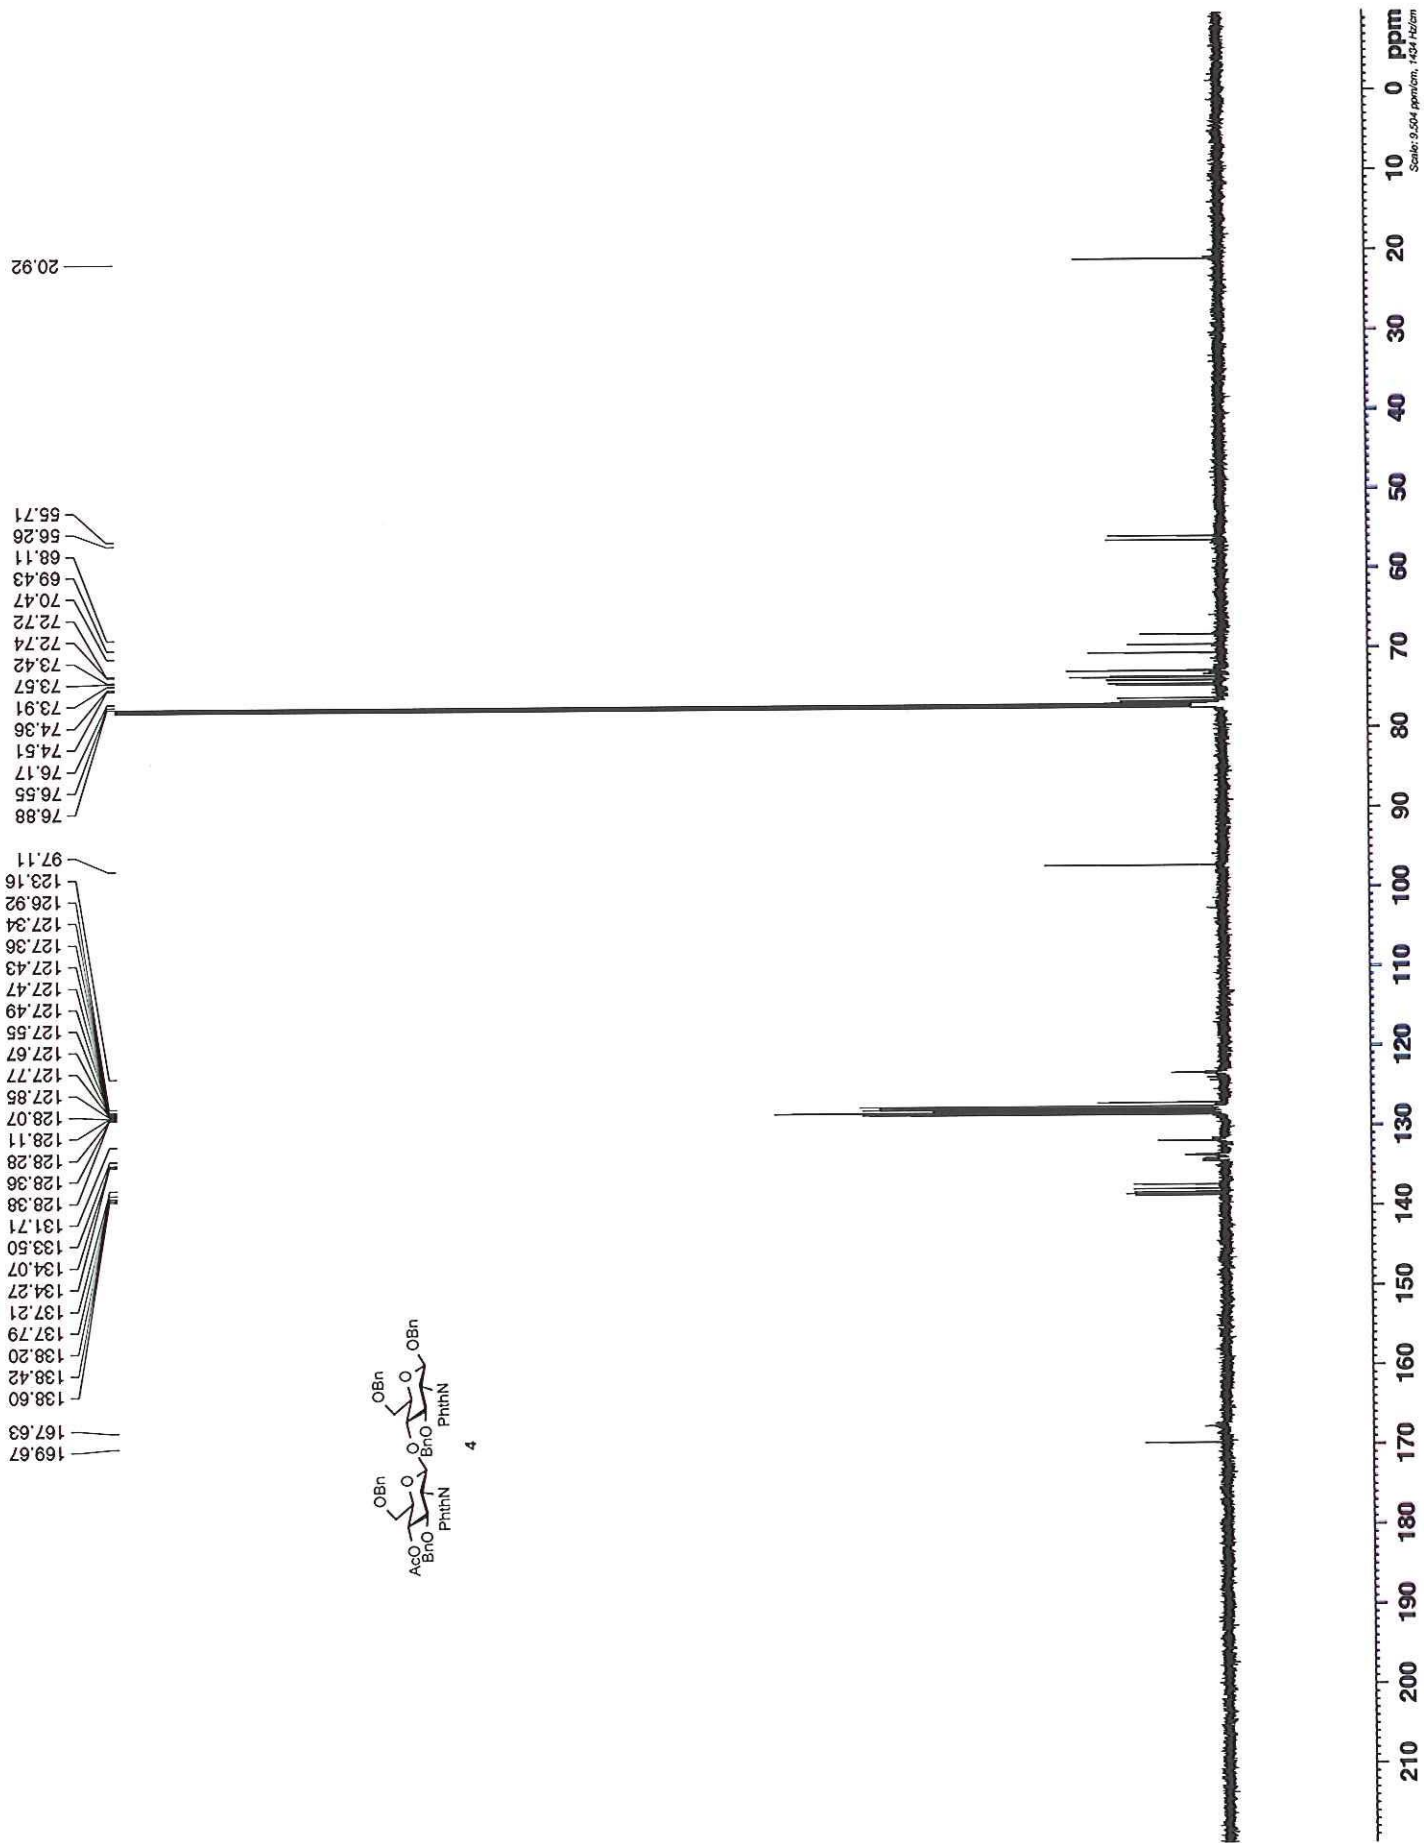



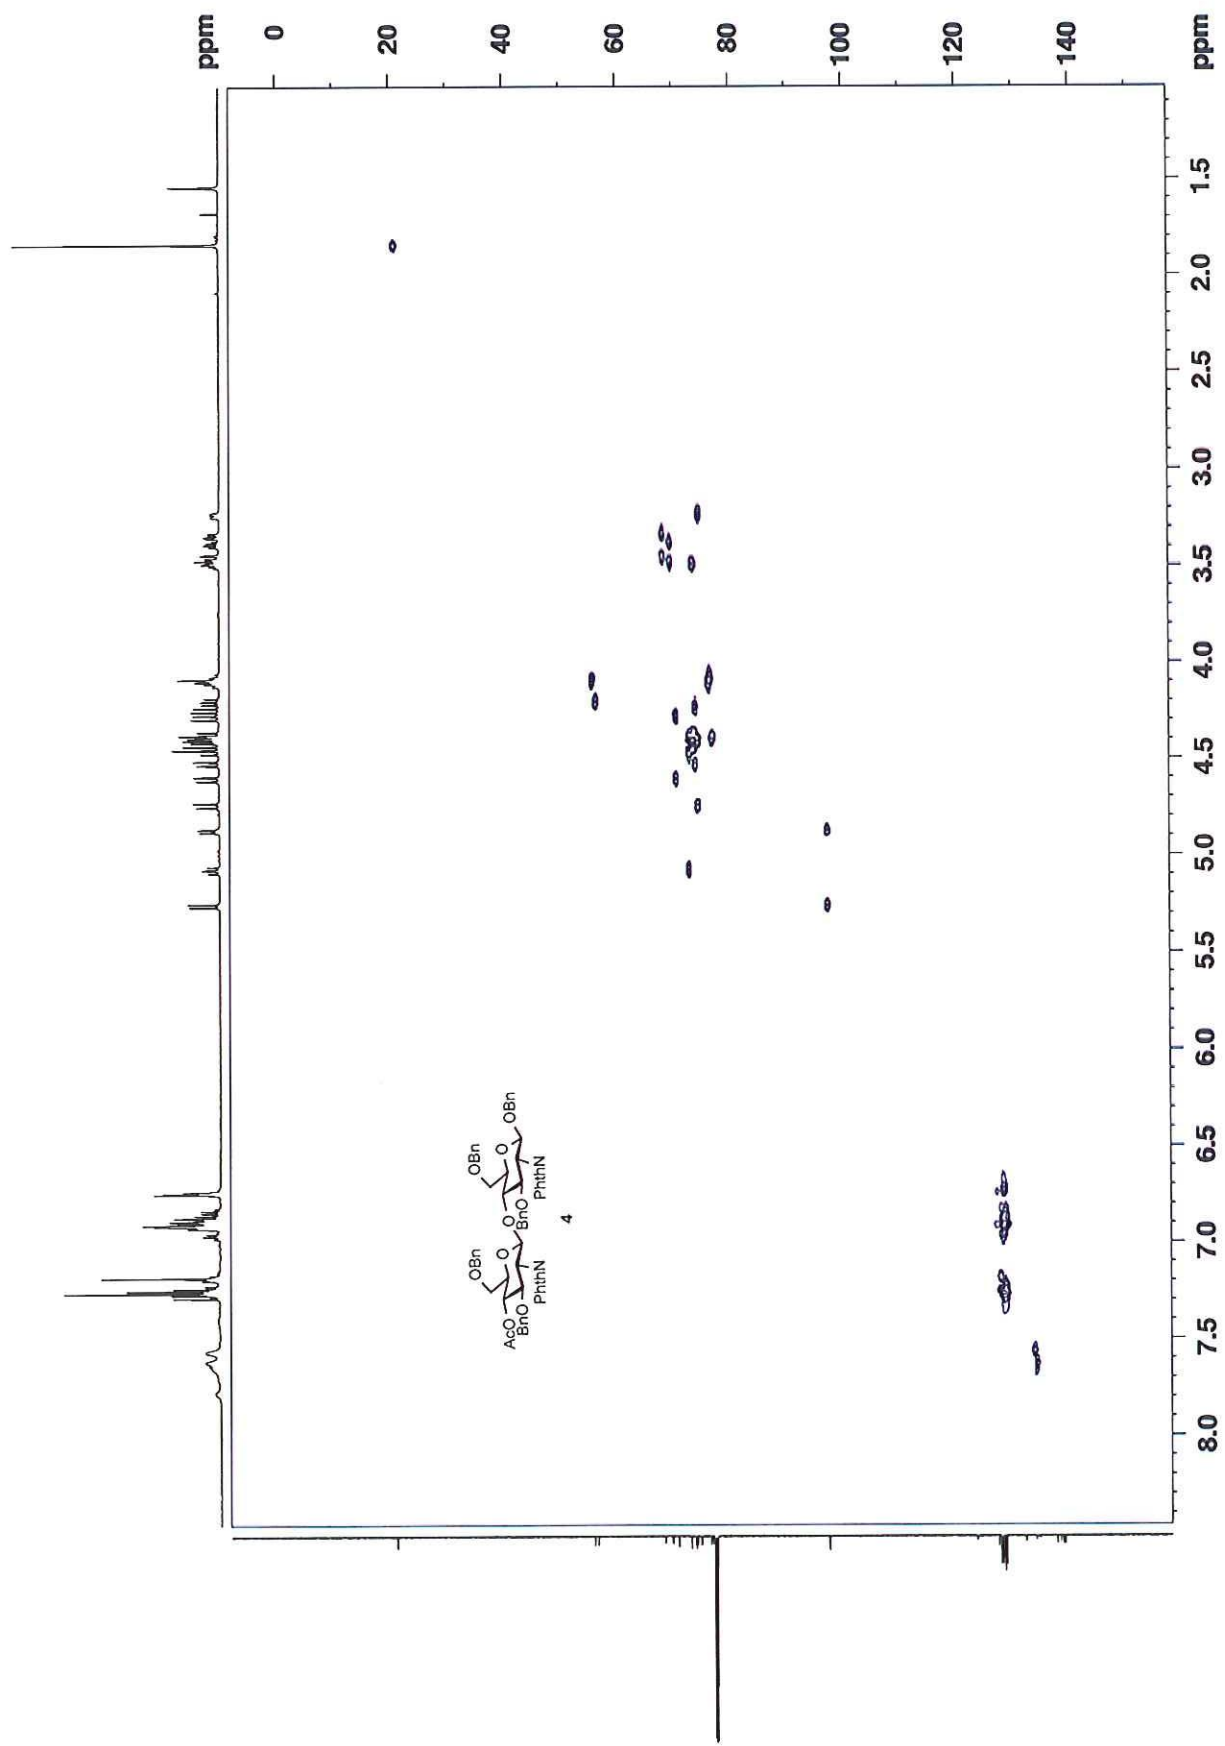

3.1095  
 3.1121  
 3.3194  
 3.3313  
 3.3356  
 3.4096  
 3.4571  
 3.4635  
 3.4753  
 3.4818  
 3.5563  
 3.5668  
 3.5727  
 3.5831  
 3.5892  
 3.5910  
 3.7194  
 3.7266  
 3.7358  
 3.7431  
 3.8416  
 4.1444  
 4.1476  
 4.1618  
 4.1663  
 4.1755  
 4.1803  
 4.1844  
 4.1892  
 4.1932  
 4.1956  
 4.1981  
 4.2063  
 4.2115  
 4.2266  
 4.2647  
 4.2787  
 4.2827  
 4.2966  
 4.3823  
 4.4029  
 4.4788  
 4.4997  
 4.5086  
 4.5306  
 4.5433  
 4.5535  
 4.5637  
 4.5732  
 4.7066  
 4.7273  
 4.7842  
 4.8056  
 4.8262  
 4.9679  
 4.9815  
 5.3302  
 5.3441  
 6.8443  
 6.8494  
 6.8538  
 6.8561  
 6.8612  
 6.9677  
 6.9713  
 6.9769  
 6.9789  
 6.9847  
 6.9922  
 6.9946  
 6.9981  
 7.0021  
 7.0104  
 7.0131  
 7.0235  
 7.0563  
 7.0589  
 7.0655  
 7.0800  
 7.2880  
 7.3017  
 7.3289  
 7.3351  
 7.3381  
 7.3417  
 7.3479  
 7.3562  
 7.3602  
 7.3630  
 7.3656  
 7.3753  
 7.3872  
 7.3996  
 7.6737  
 7.7257  
 7.7680

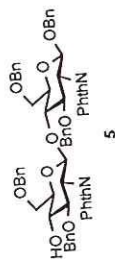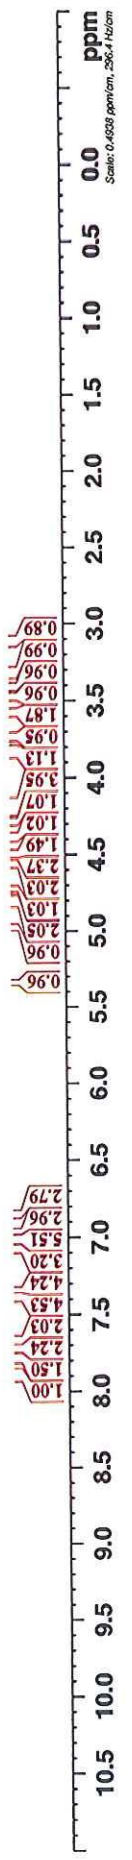

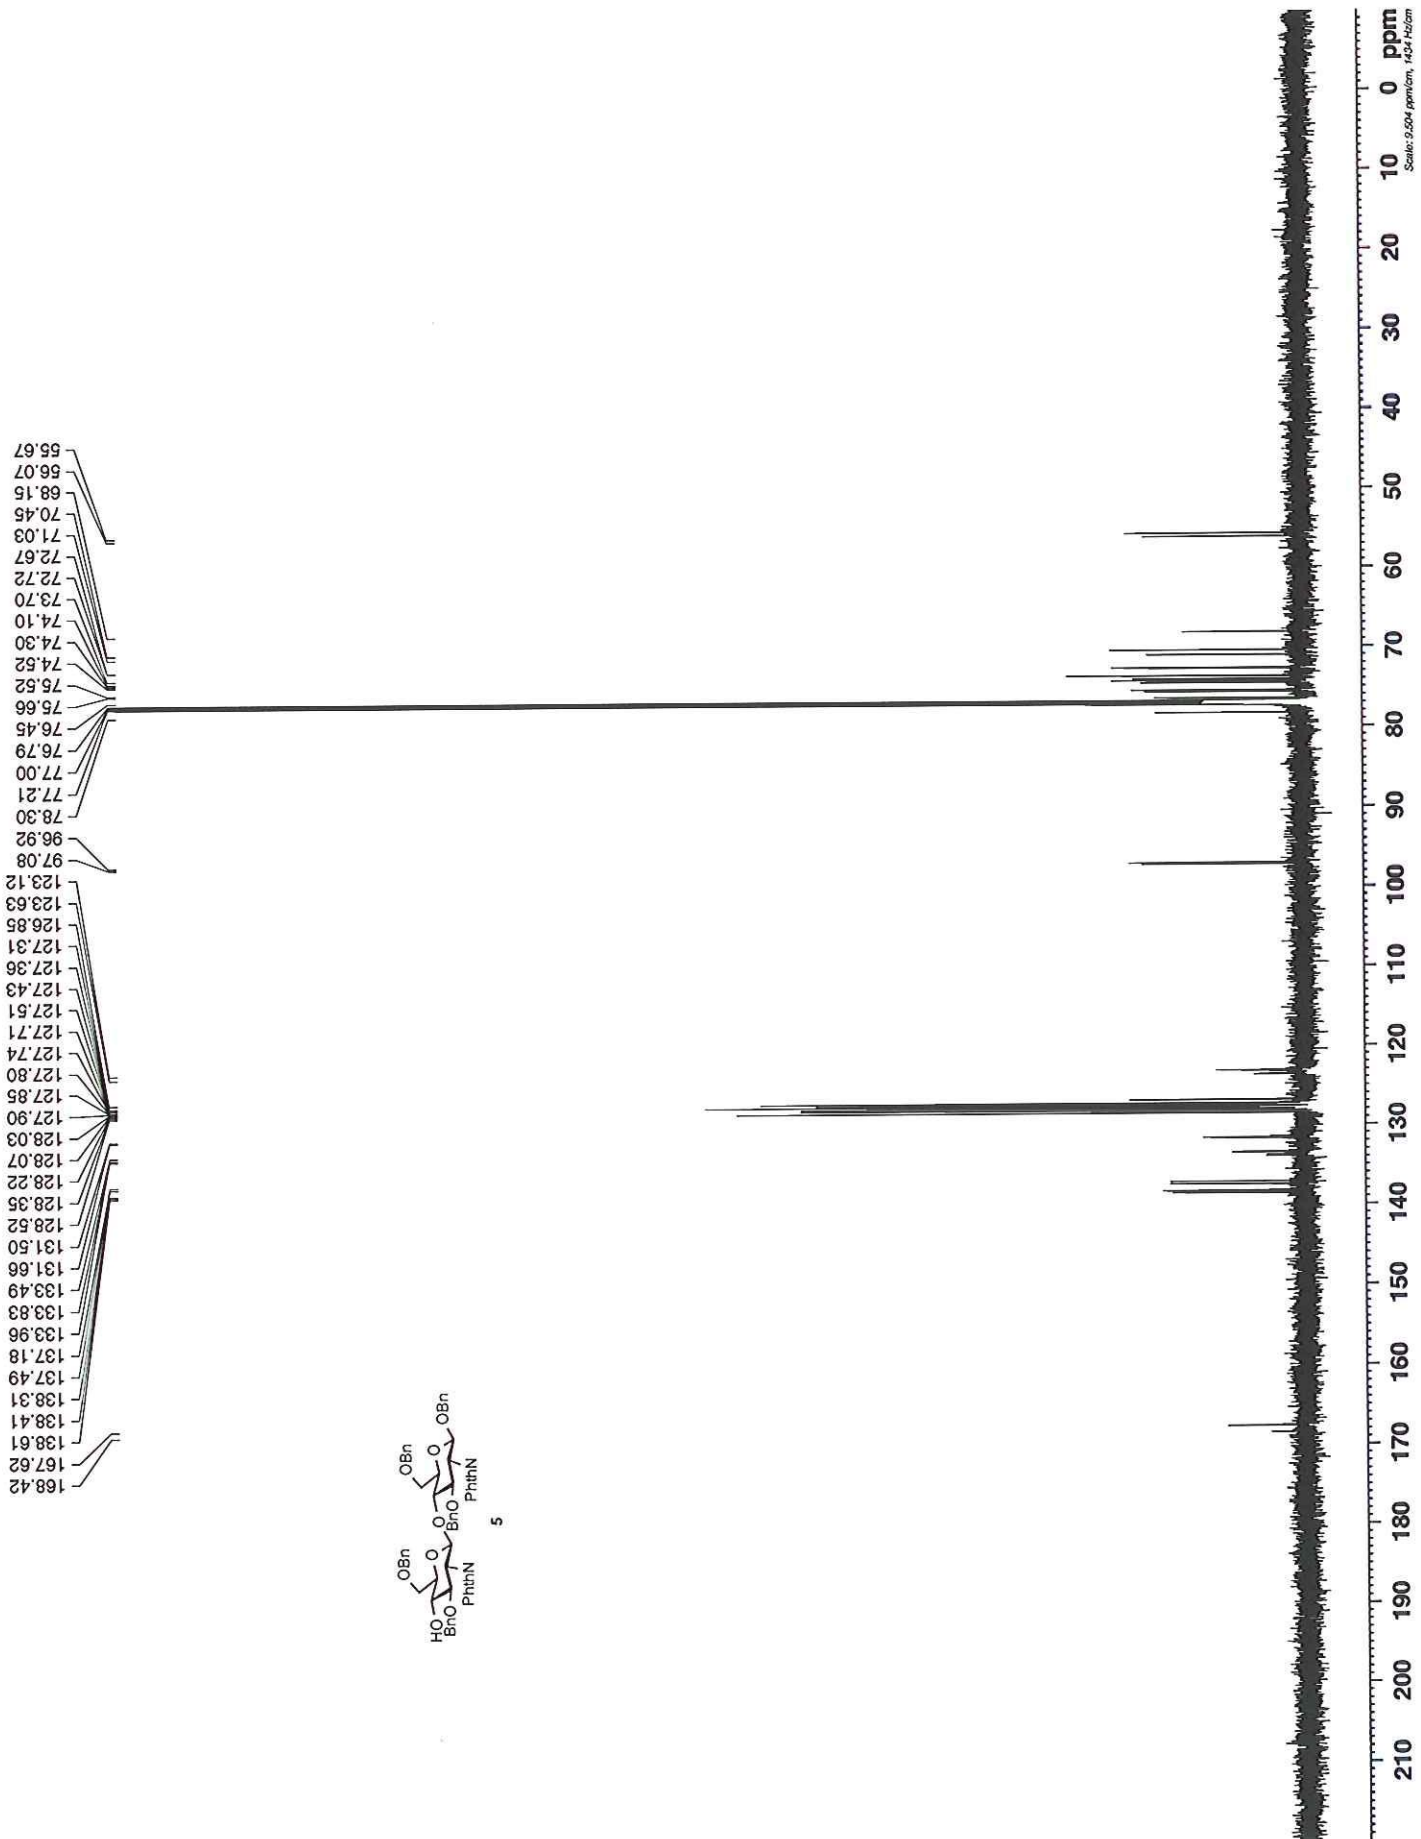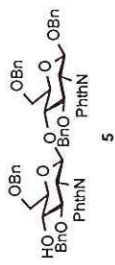

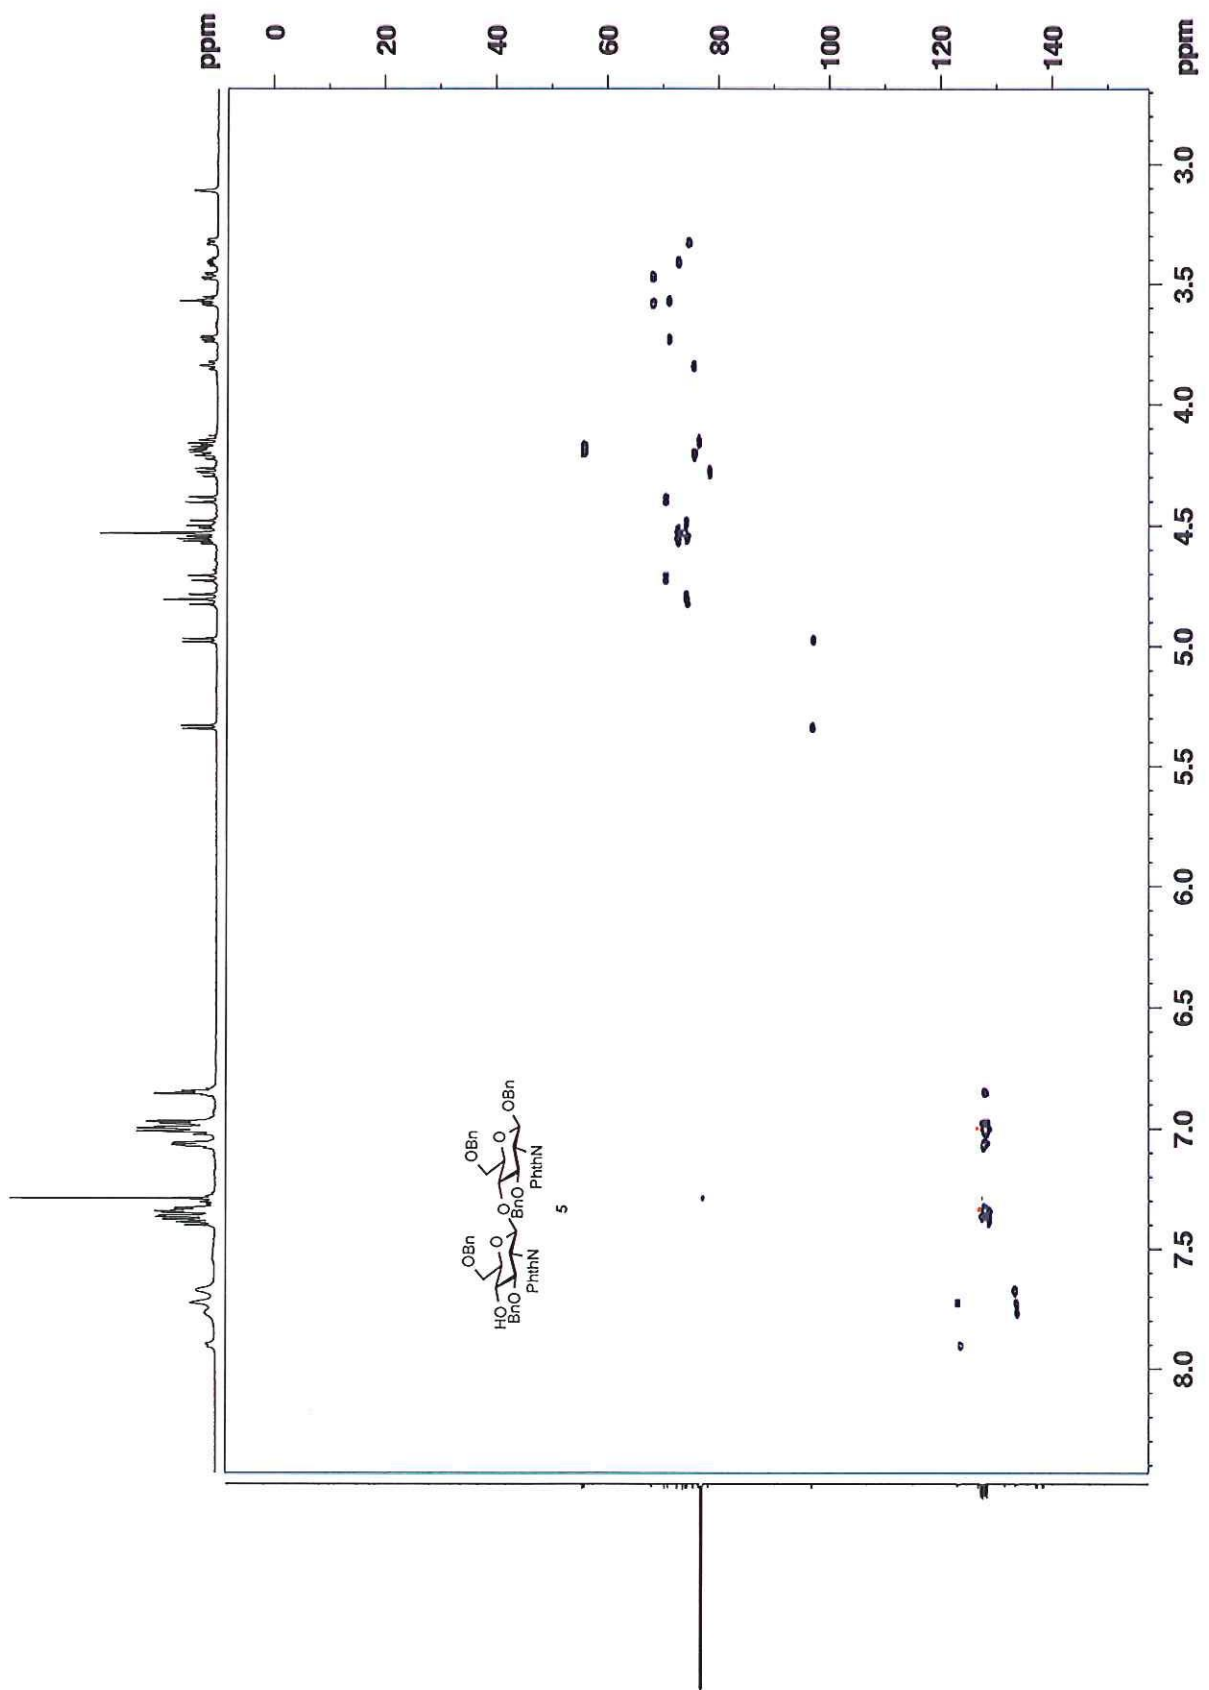











162.25  
 162.04  
 159.34  
 159.32  
 158.96  
 158.94  
 158.90  
 158.82  
 157.26  
 156.93  
 156.90  
 137.75  
 136.98  
 132.89  
 132.03  
 132.00  
 131.93  
 131.26  
 129.69  
 129.40  
 129.27  
 128.24  
 128.04  
 127.89  
 127.76  
 127.72  
 127.41  
 124.14  
 121.87  
 121.80  
 121.68  
 121.61  
 121.47  
 121.40  
 121.28  
 121.20  
 119.34  
 119.28  
 119.25  
 119.19  
 118.98  
 118.92  
 118.89  
 118.83  
 118.67  
 118.60  
 118.46  
 118.40  
 118.36  
 118.33  
 118.22  
 118.19  
 118.16  
 118.13  
 85.96  
 74.83  
 73.48  
 71.46  
 70.95  
 70.93  
 69.29  
 69.12

29.65

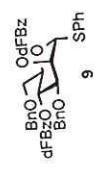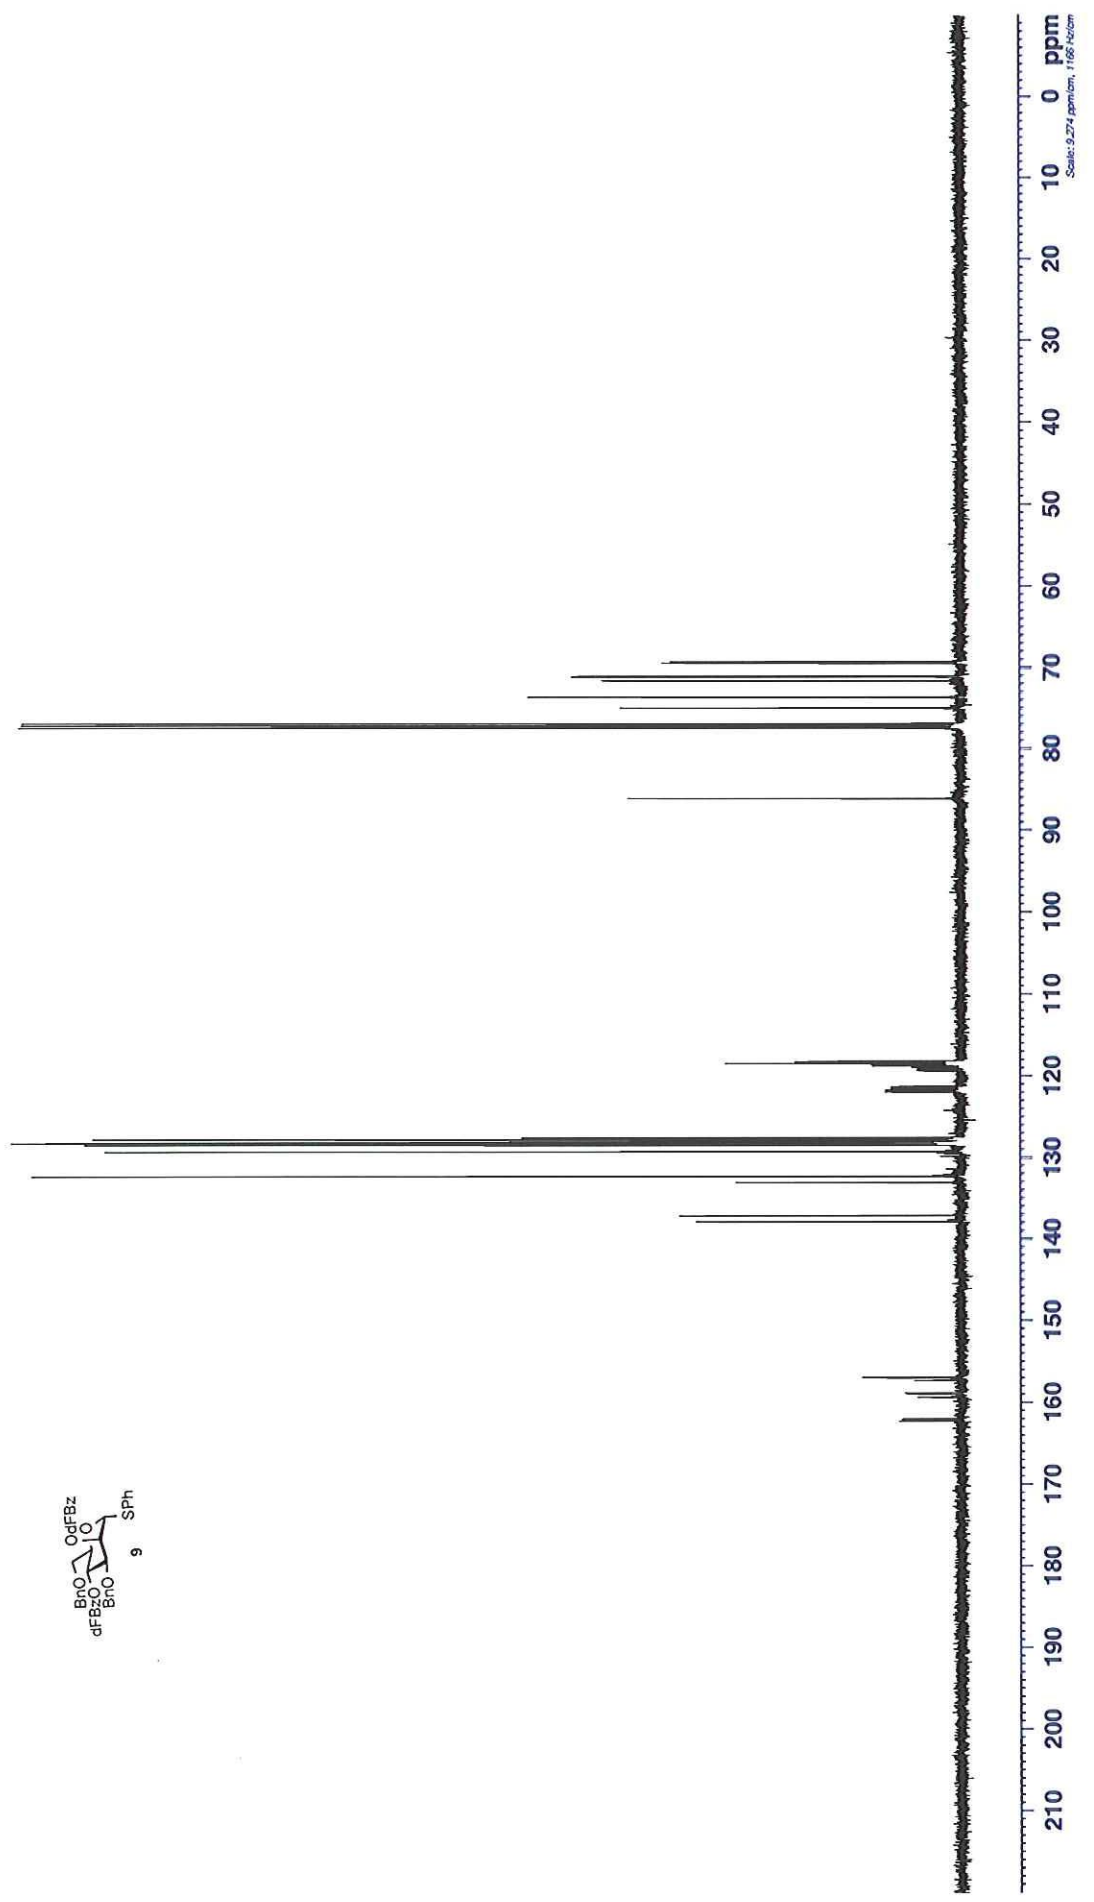

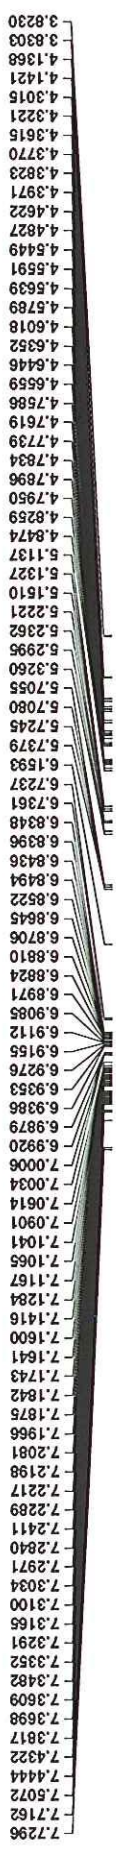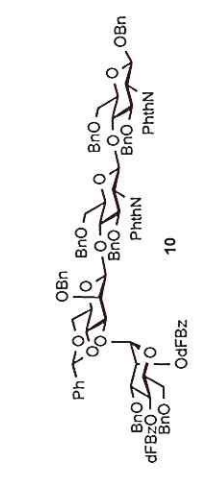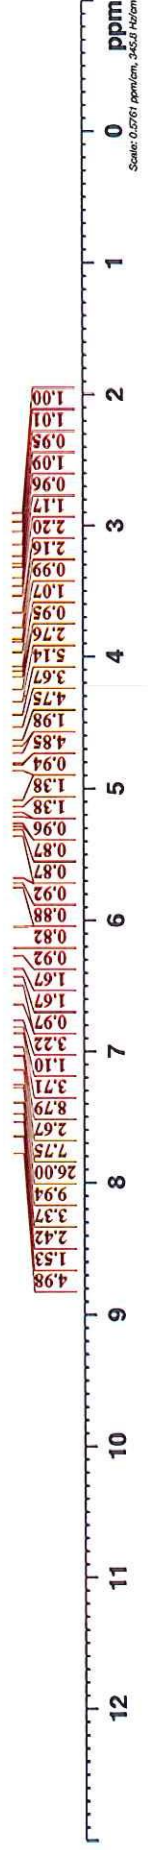



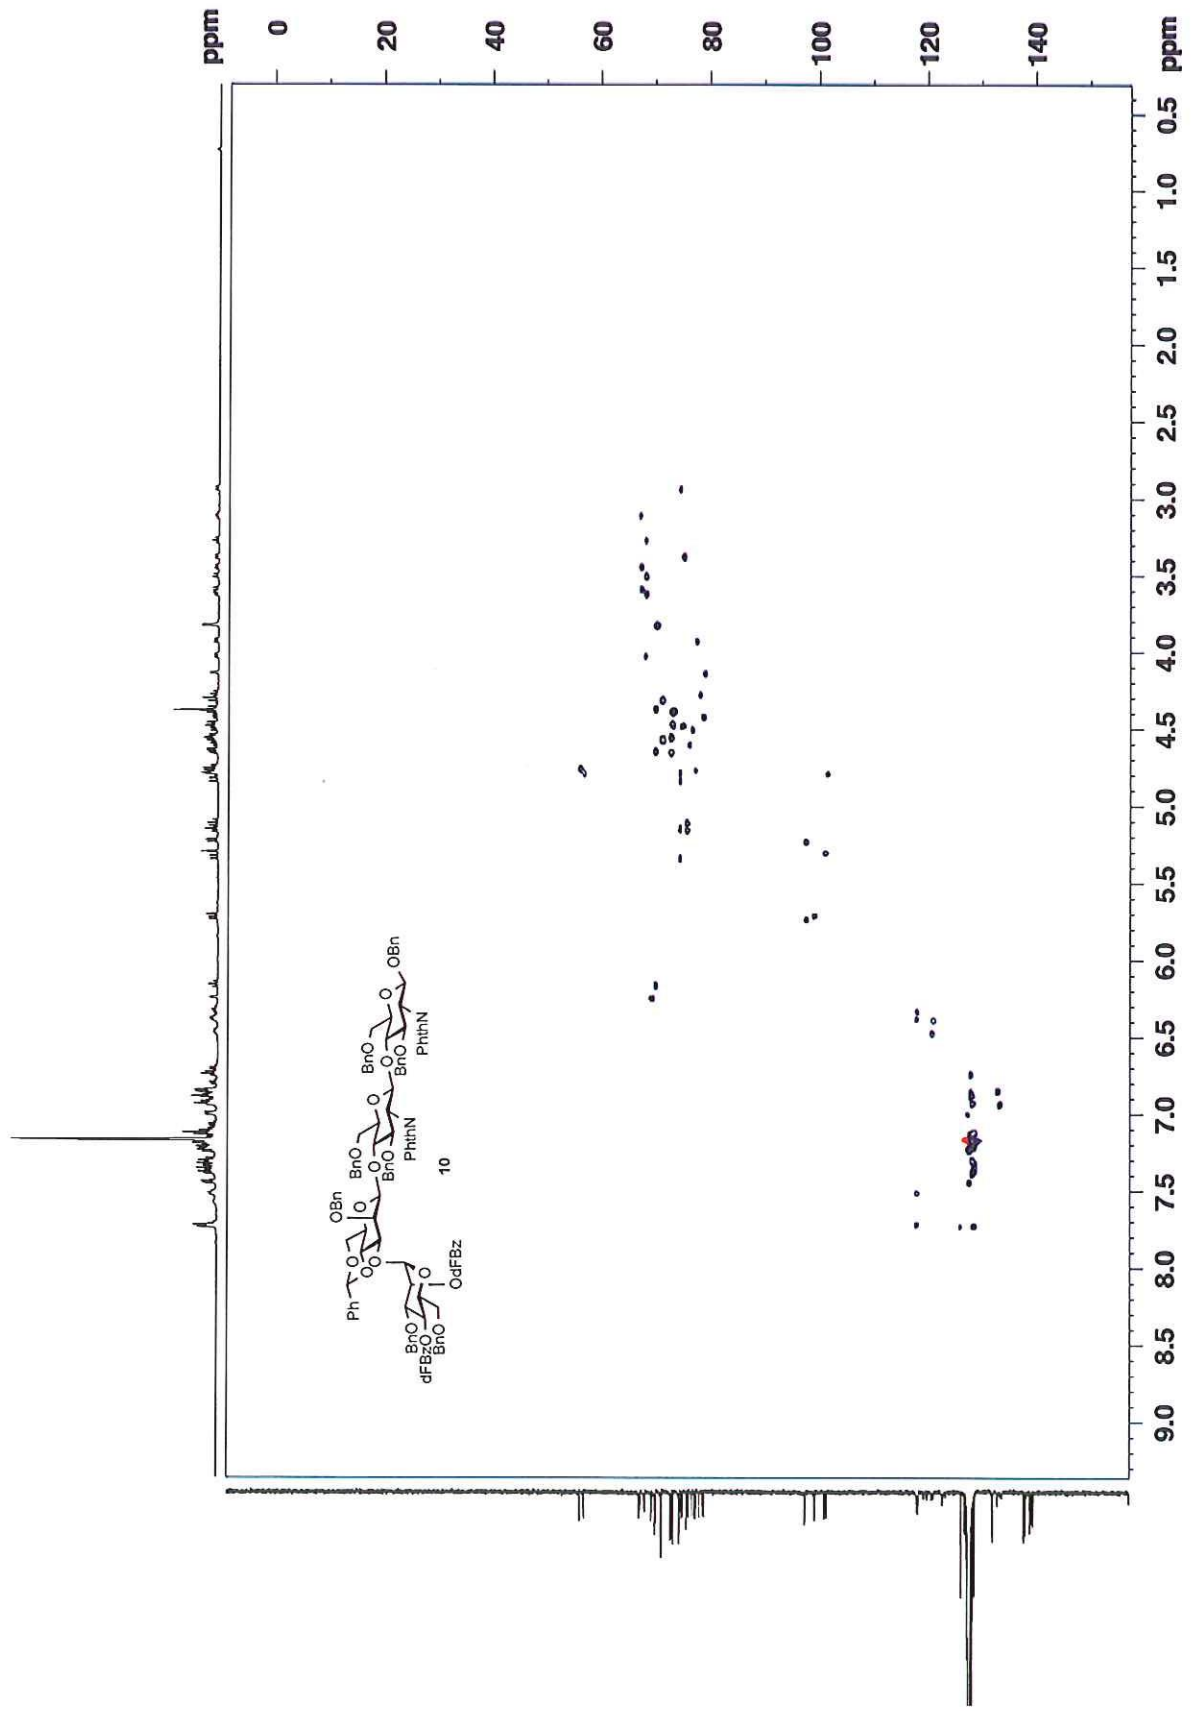

7.6046  
7.5557  
7.5502  
7.5473  
7.5423  
7.5375  
7.3352  
7.3228  
7.2584  
7.2462  
7.2375  
7.2266  
7.2144  
7.2102  
7.2024  
7.1983  
7.1906  
7.1772  
7.1666  
7.1561  
7.1497  
7.1457  
7.1419  
7.1388  
7.1332  
7.1261  
7.1193  
7.1149  
7.1042  
6.9785  
6.9667  
6.9546  
6.8983  
6.8857  
6.8818  
6.8715  
6.8672  
6.8547  
6.8495  
6.8438  
6.8288  
6.8199  
6.8149  
6.6440  
6.6030  
5.5419  
5.2181  
5.2120  
5.1984  
4.9408  
4.8788  
4.8656  
4.8573  
4.7713  
4.7497  
4.7341  
4.6662  
4.6477  
4.6153  
4.5947  
4.5272  
4.5071  
4.4831  
4.4640  
4.4439  
4.4344  
4.4244  
4.4150  
4.4045  
4.3972  
4.3230  
4.3034  
4.2968  
4.2860  
4.2834  
4.2761  
4.1784  
4.1195  
4.1039  
4.1005  
4.0864  
4.0647  
4.0507  
3.9827  
3.8379  
3.8332  
3.7717  
3.5254  
3.5123  
3.5052  
3.4807  
3.4632

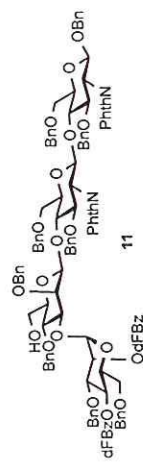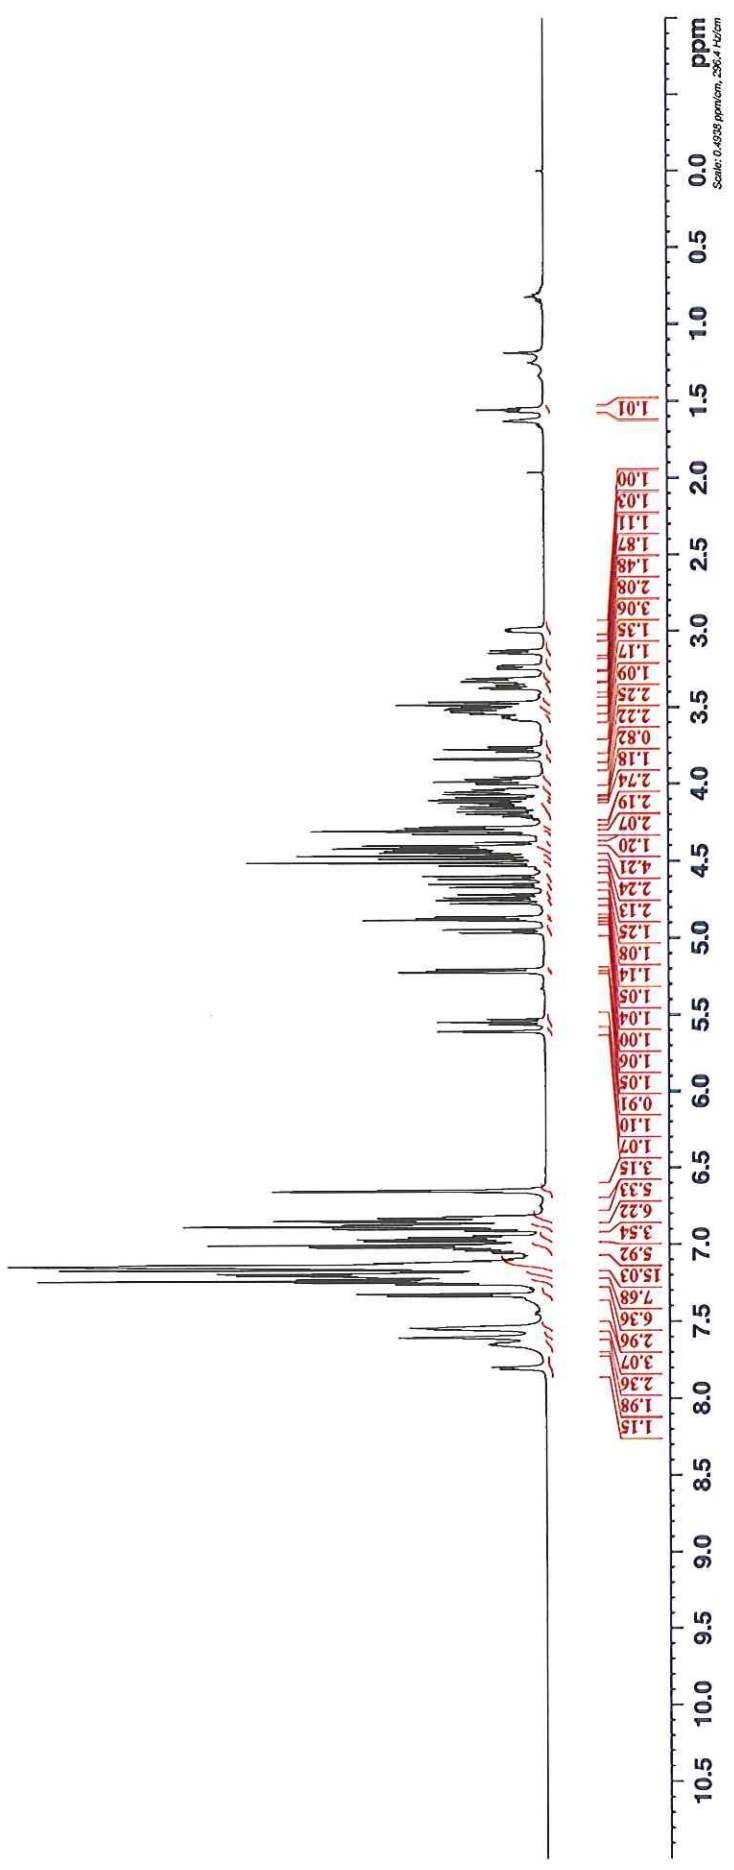



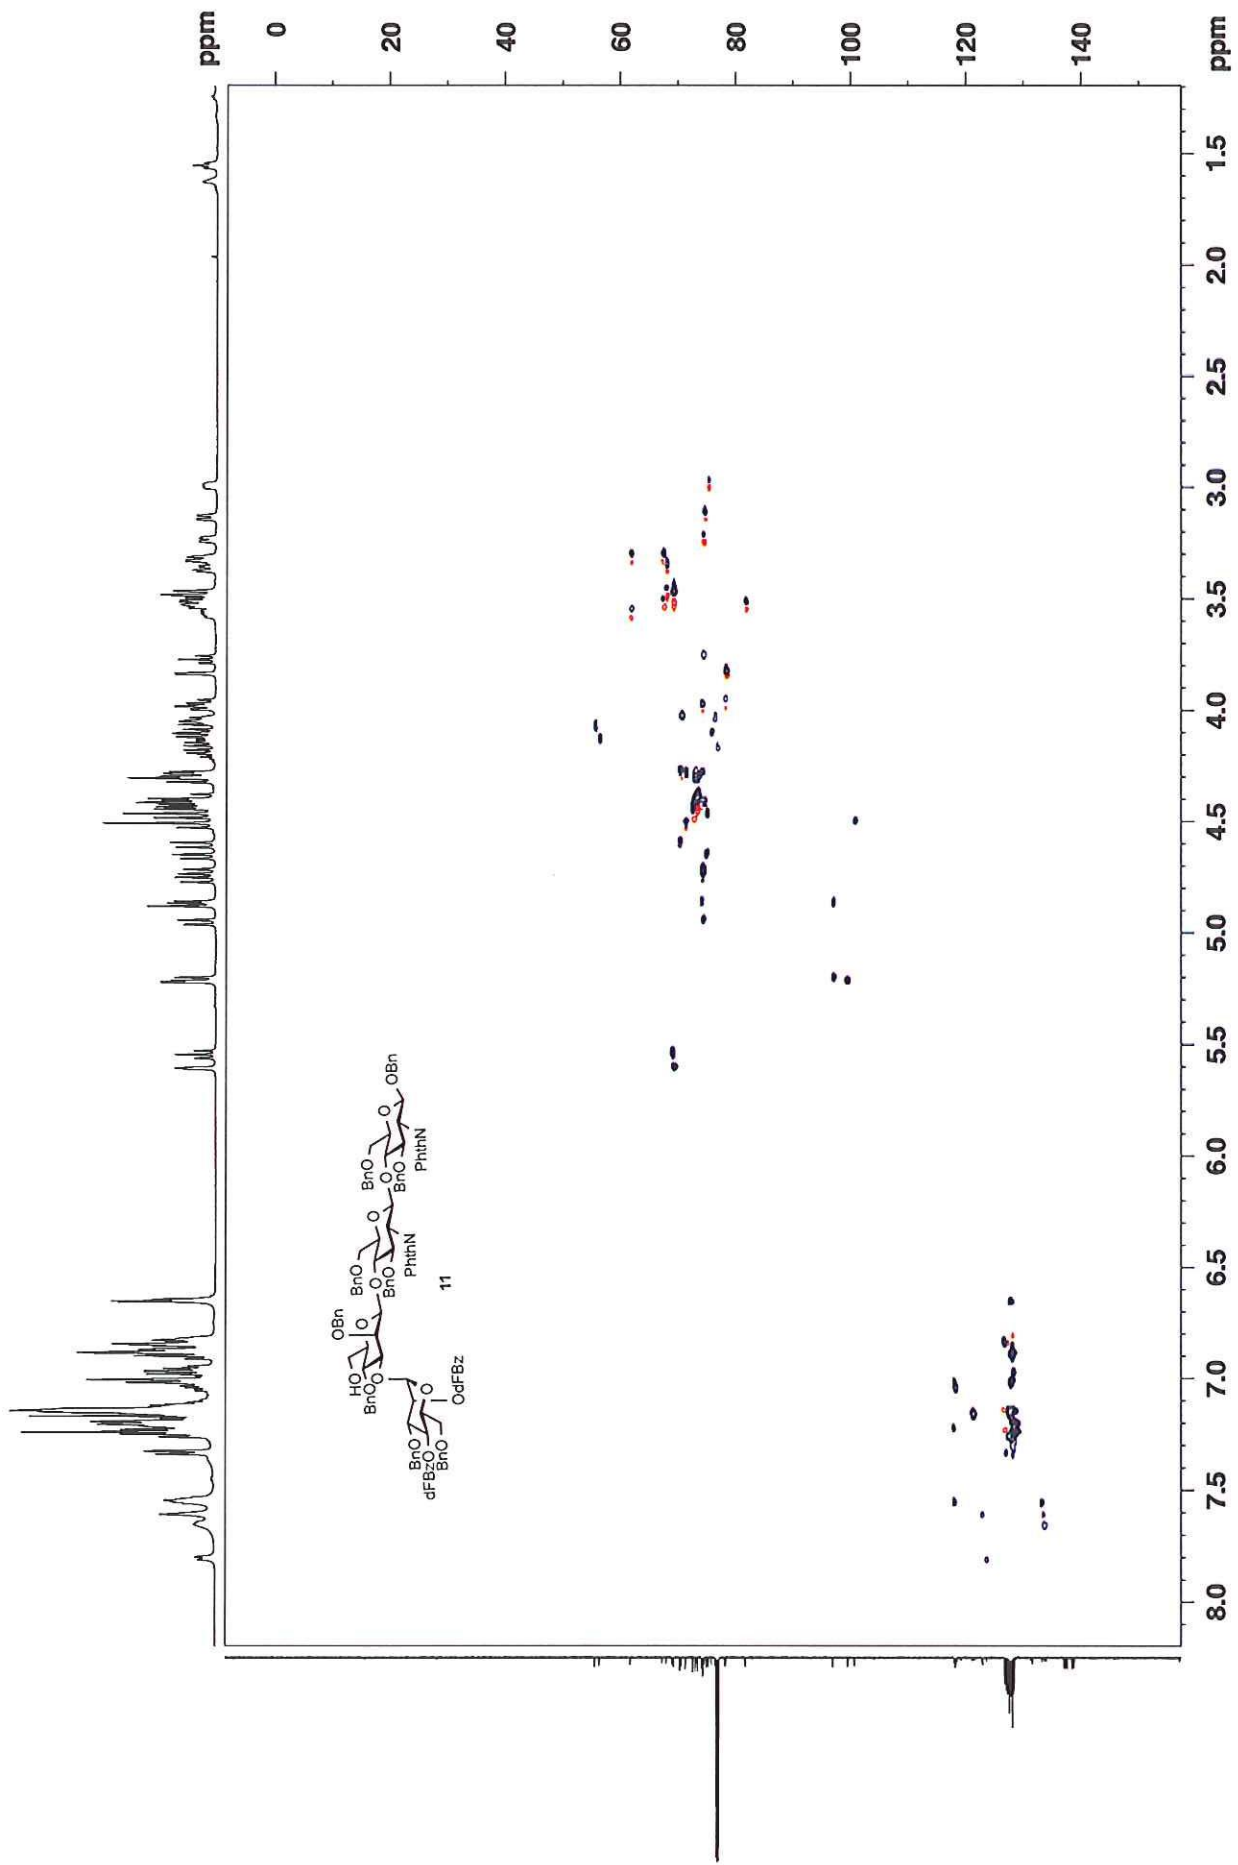

1.1802  
 1.1998  
 1.2146  
 1.2293  
 1.4868  
 2.2779  
 2.5002  
 2.5151  
 2.5296  
 2.5412  
 2.5559  
 2.5714  
 2.5874  
 2.6020  
 2.6137  
 2.6281  
 2.6428  
 3.6361  
 3.6574  
 3.7683  
 3.7762  
 3.7898  
 3.7977  
 3.9118  
 3.9175  
 3.9303  
 3.9361  
 3.9763  
 3.9853  
 4.0141  
 4.1125  
 4.1162  
 4.1314  
 4.1354  
 4.3849  
 4.4074  
 4.4344  
 4.4866  
 4.5093  
 4.6176  
 4.6418  
 4.6554  
 4.6781  
 4.7581  
 4.7796  
 5.3637  
 5.5925  
 6.9997  
 7.0080  
 7.0183  
 7.0265  
 7.0371  
 7.0454  
 7.0783  
 7.0905  
 7.1054  
 7.1338  
 7.1404  
 7.1478  
 7.1553  
 7.1656  
 7.1721  
 7.1915  
 7.2016  
 7.2124  
 7.2192  
 7.2342  
 7.2483  
 7.2778  
 7.2925  
 7.3187  
 7.5983  
 7.6052  
 7.6089  
 7.6151  
 7.6217  
 7.6249  
 7.6319

BrO  
 O<sub>2</sub>FBz  
 BrO  
 BrO  
 12 SET

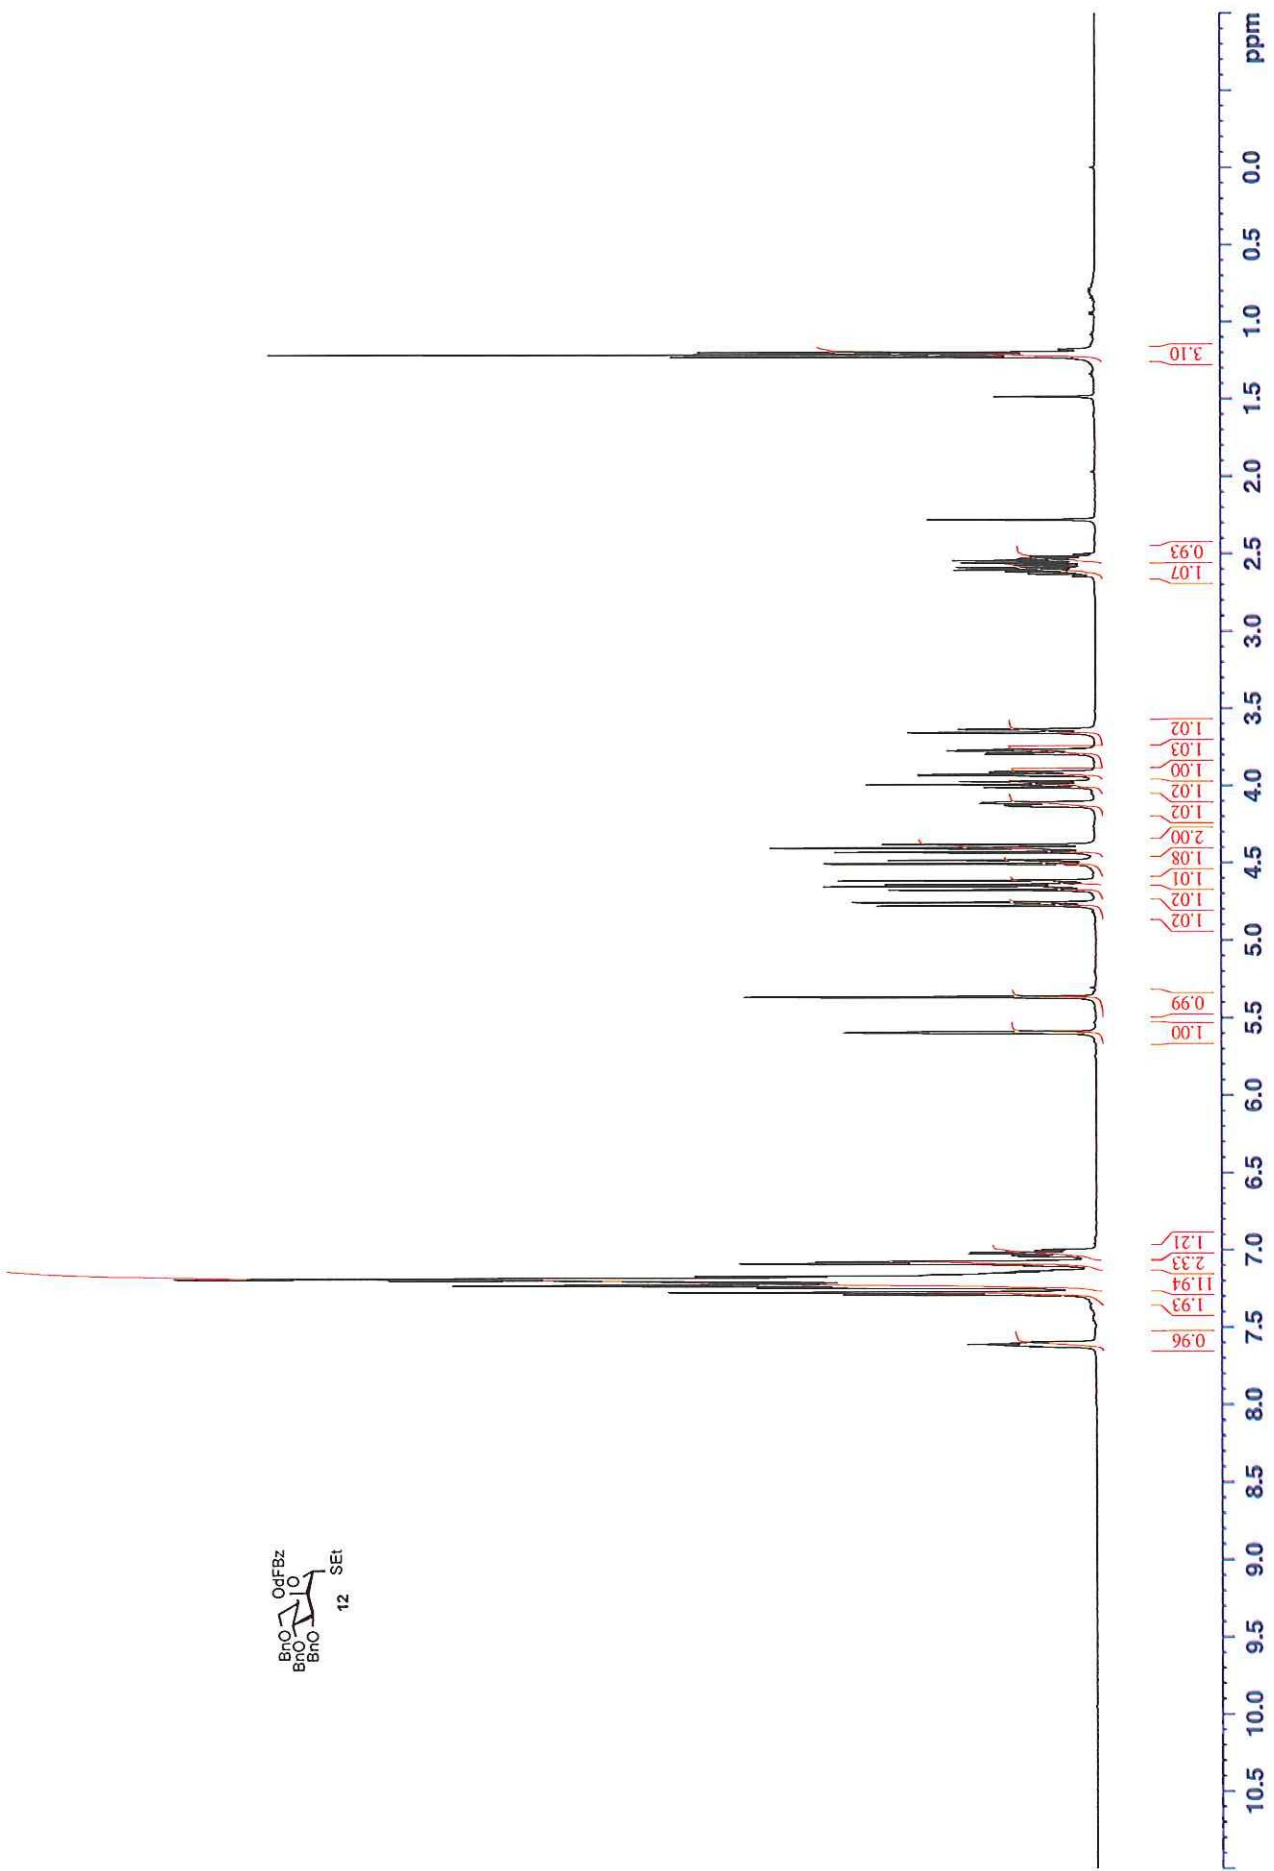



14.93  
21.44  
25.61

68.71  
71.70  
71.79  
71.88  
73.29  
74.48  
75.22  
78.48  
82.19  
118.29  
118.35  
118.49  
118.56  
119.28  
119.35  
119.38  
119.44  
121.38  
121.45  
121.57  
121.64  
125.27  
127.48  
127.62  
127.79  
127.92  
128.10  
128.20  
128.24  
128.28  
128.37  
129.01  
137.57  
138.20  
138.24  
156.95  
156.97  
157.25  
157.28  
158.89  
158.91  
159.31  
159.33  
162.24  
162.26  
162.28  
162.29

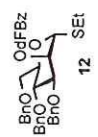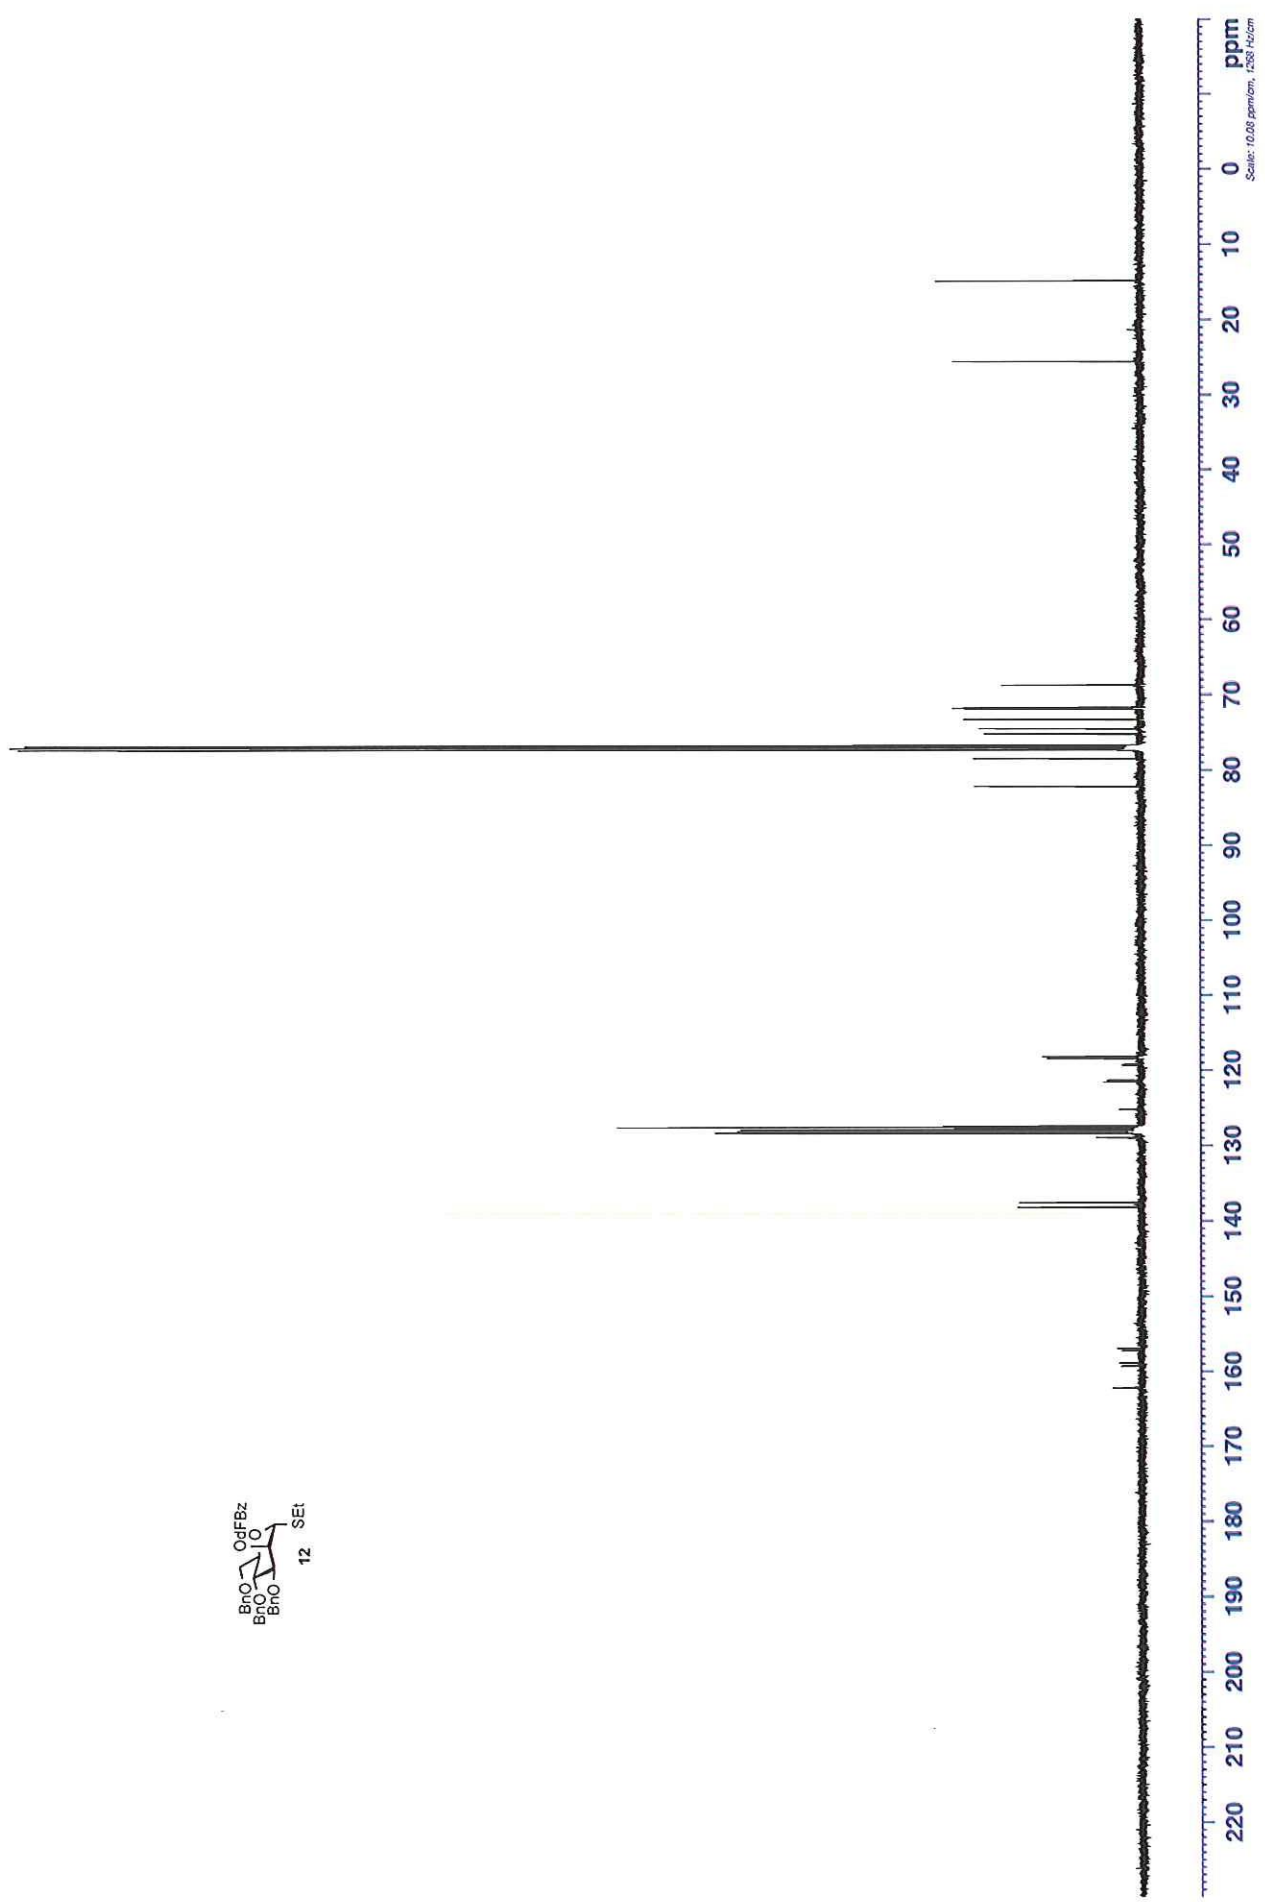

7.5380  
7.5335  
7.5297  
7.5242  
7.5125  
7.4009  
7.3884  
7.2078  
7.2022  
7.1952  
7.1820  
7.1899  
7.1820  
7.1769  
7.1625  
7.1503  
7.1476  
7.1373  
7.1250  
7.1220  
7.1137  
7.1058  
7.1004  
7.0922  
7.0828  
7.0735  
7.0616  
7.0233  
7.0106  
7.0083  
7.0030  
6.9915  
6.9895  
6.9769  
6.9721  
6.9566  
6.9444  
6.9330  
6.8759  
6.8635  
6.8596  
6.8239  
6.8113  
6.7630  
6.7529  
6.7506  
6.6176  
6.6054  
6.4899  
6.4777  
6.4559  
6.4597  
6.4786  
6.4755  
6.4662  
4.5897  
4.5707  
4.5342  
4.4989  
4.4788  
4.4362  
4.4339  
4.4264  
4.4173  
4.4139  
4.4001  
4.3957  
4.3924  
4.3772  
4.3704  
4.3527  
4.3454  
4.3322  
4.3267  
4.3229  
4.3175  
4.3022  
4.2971  
4.2696  
4.2489  
4.2288  
4.0838  
4.0717  
4.0568  
3.8872  
3.8338  
3.8381  
3.5301  
3.5085  
3.4916

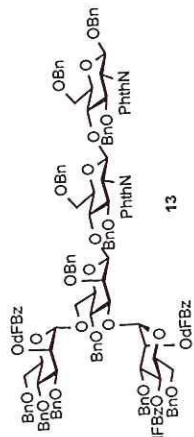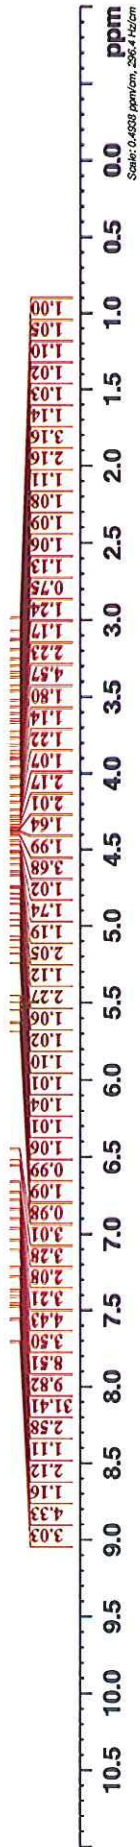

167.50  
138.92  
138.56  
138.49  
138.44  
138.39  
138.38  
137.84  
137.80  
137.73  
137.46  
137.27  
137.11  
131.60  
128.49  
128.37  
128.31  
128.26  
128.22  
128.14  
128.10  
128.09  
128.04  
128.02  
127.97  
127.83  
127.66  
127.62  
127.48  
127.45  
127.42  
127.40  
127.37  
127.25  
127.23  
127.19  
127.17  
126.73  
126.70  
122.96  
118.37  
118.33  
118.20  
118.16  
118.10  
118.04  
101.94  
99.65  
98.00  
97.00  
96.95  
82.15  
79.76  
78.17  
77.39  
76.62  
76.82  
75.06  
74.96  
74.78  
74.64  
74.58  
74.45  
74.43  
74.36  
74.32  
74.11  
74.09  
73.55  
73.19  
73.00  
72.59  
71.97  
71.46  
71.05  
70.78  
70.38  
69.42  
69.28  
69.19  
68.71  
68.02  
56.49  
55.66

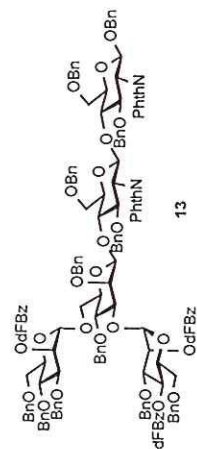

210 200 190 180 170 160 150 140 130 120 110 100 90 80 70 60 50 40 30 20 10 0 ppm  
Scale: 0.004 ppm/cm, 1424 Hz/cm

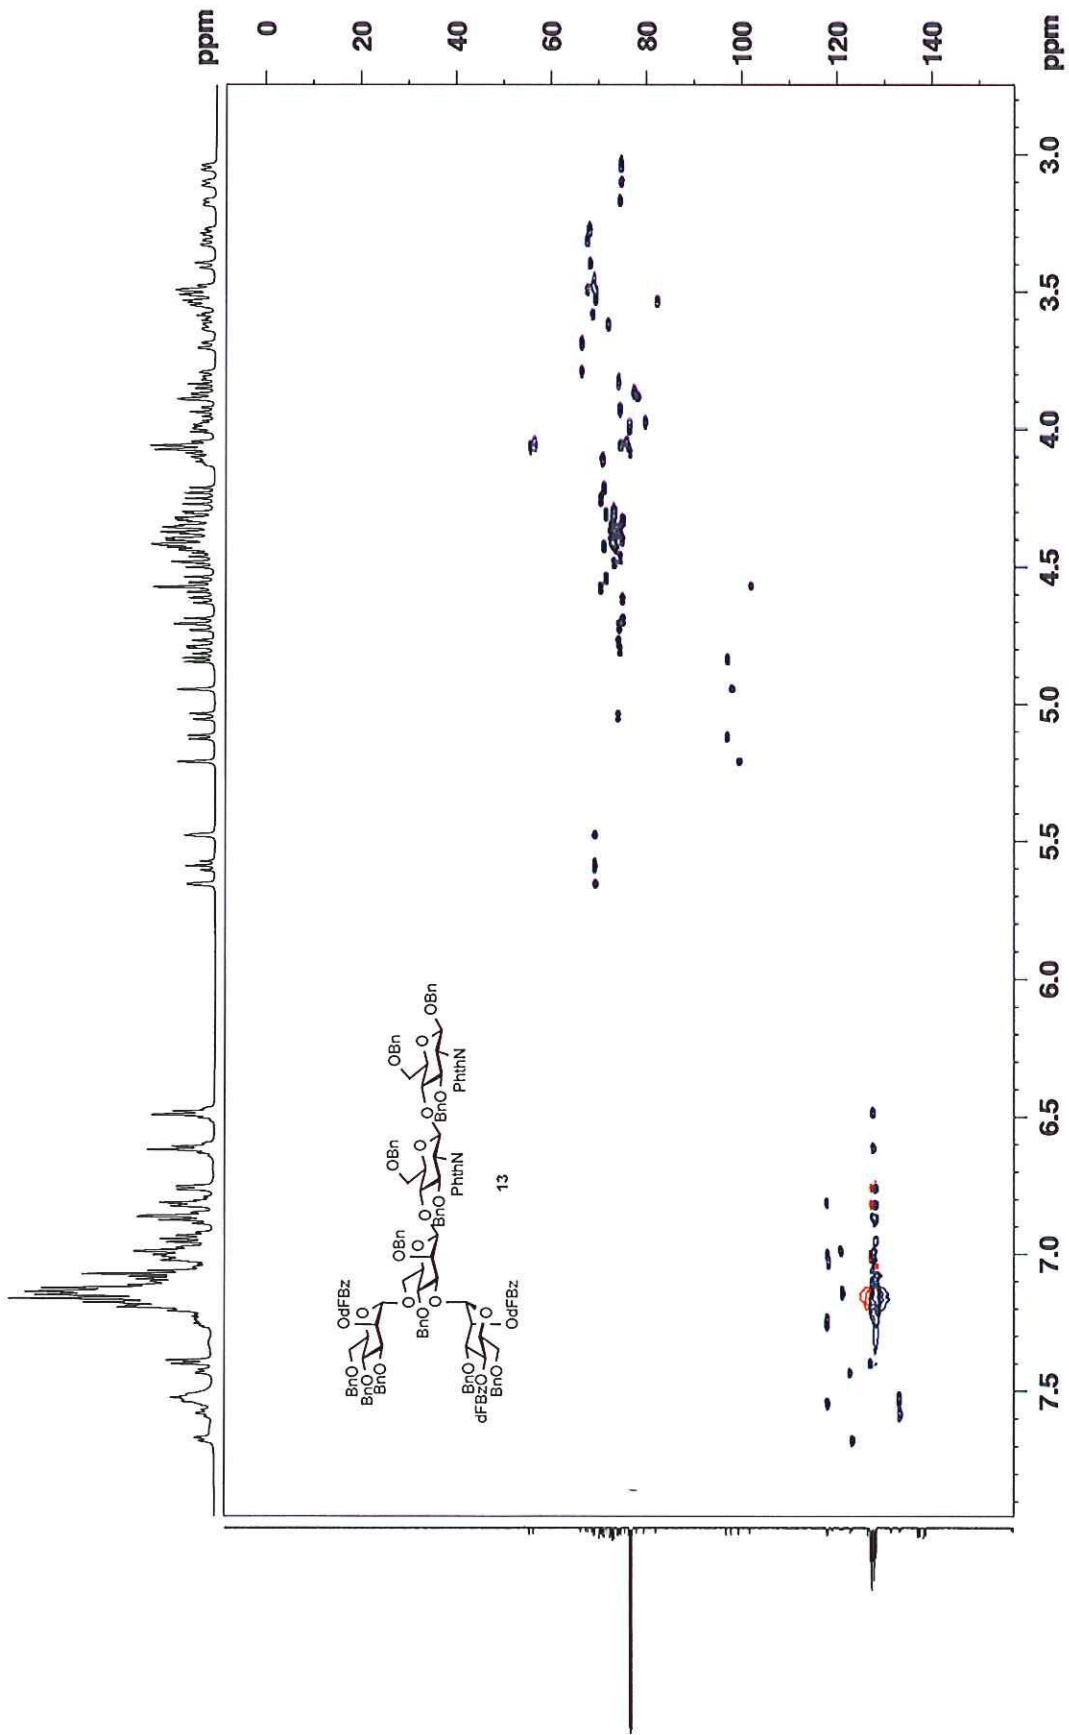

7.8035  
7.6713  
7.4919  
7.4770  
7.3530  
7.3400  
7.3133  
7.2981  
7.2874  
7.2740  
7.2599  
7.2336  
7.2220  
7.2090  
7.1991  
7.1405  
7.1333  
7.0164  
7.0021  
6.9803  
6.9703  
6.9651  
6.8891  
6.8753  
6.7622  
6.7506  
6.7340  
5.1742  
5.0642  
5.0150  
4.9867  
4.9653  
4.8782  
4.8515  
4.8266  
4.7846  
4.7628  
4.7322  
4.7075  
4.6509  
4.6441  
4.6325  
4.6008  
4.5824  
4.5578  
4.5438  
4.5320  
4.5207  
4.5107  
4.5049  
4.4973  
4.4918  
4.4666  
4.4532  
4.4312  
4.4114  
4.3866  
4.3796  
4.3587  
4.281  
4.2217  
4.2133  
4.1957  
4.1907  
4.1607  
3.9371  
3.9308  
3.9117  
3.8927  
3.7968  
3.7779  
3.7599  
3.7358  
3.7251  
3.7057  
3.6274  
3.6096  
3.5964  
3.5919  
3.5701  
3.5447  
3.4489  
3.2177  
3.1994  
2.4069  
2.2930  
2.0935

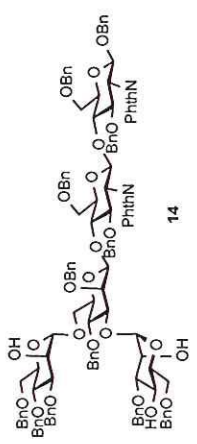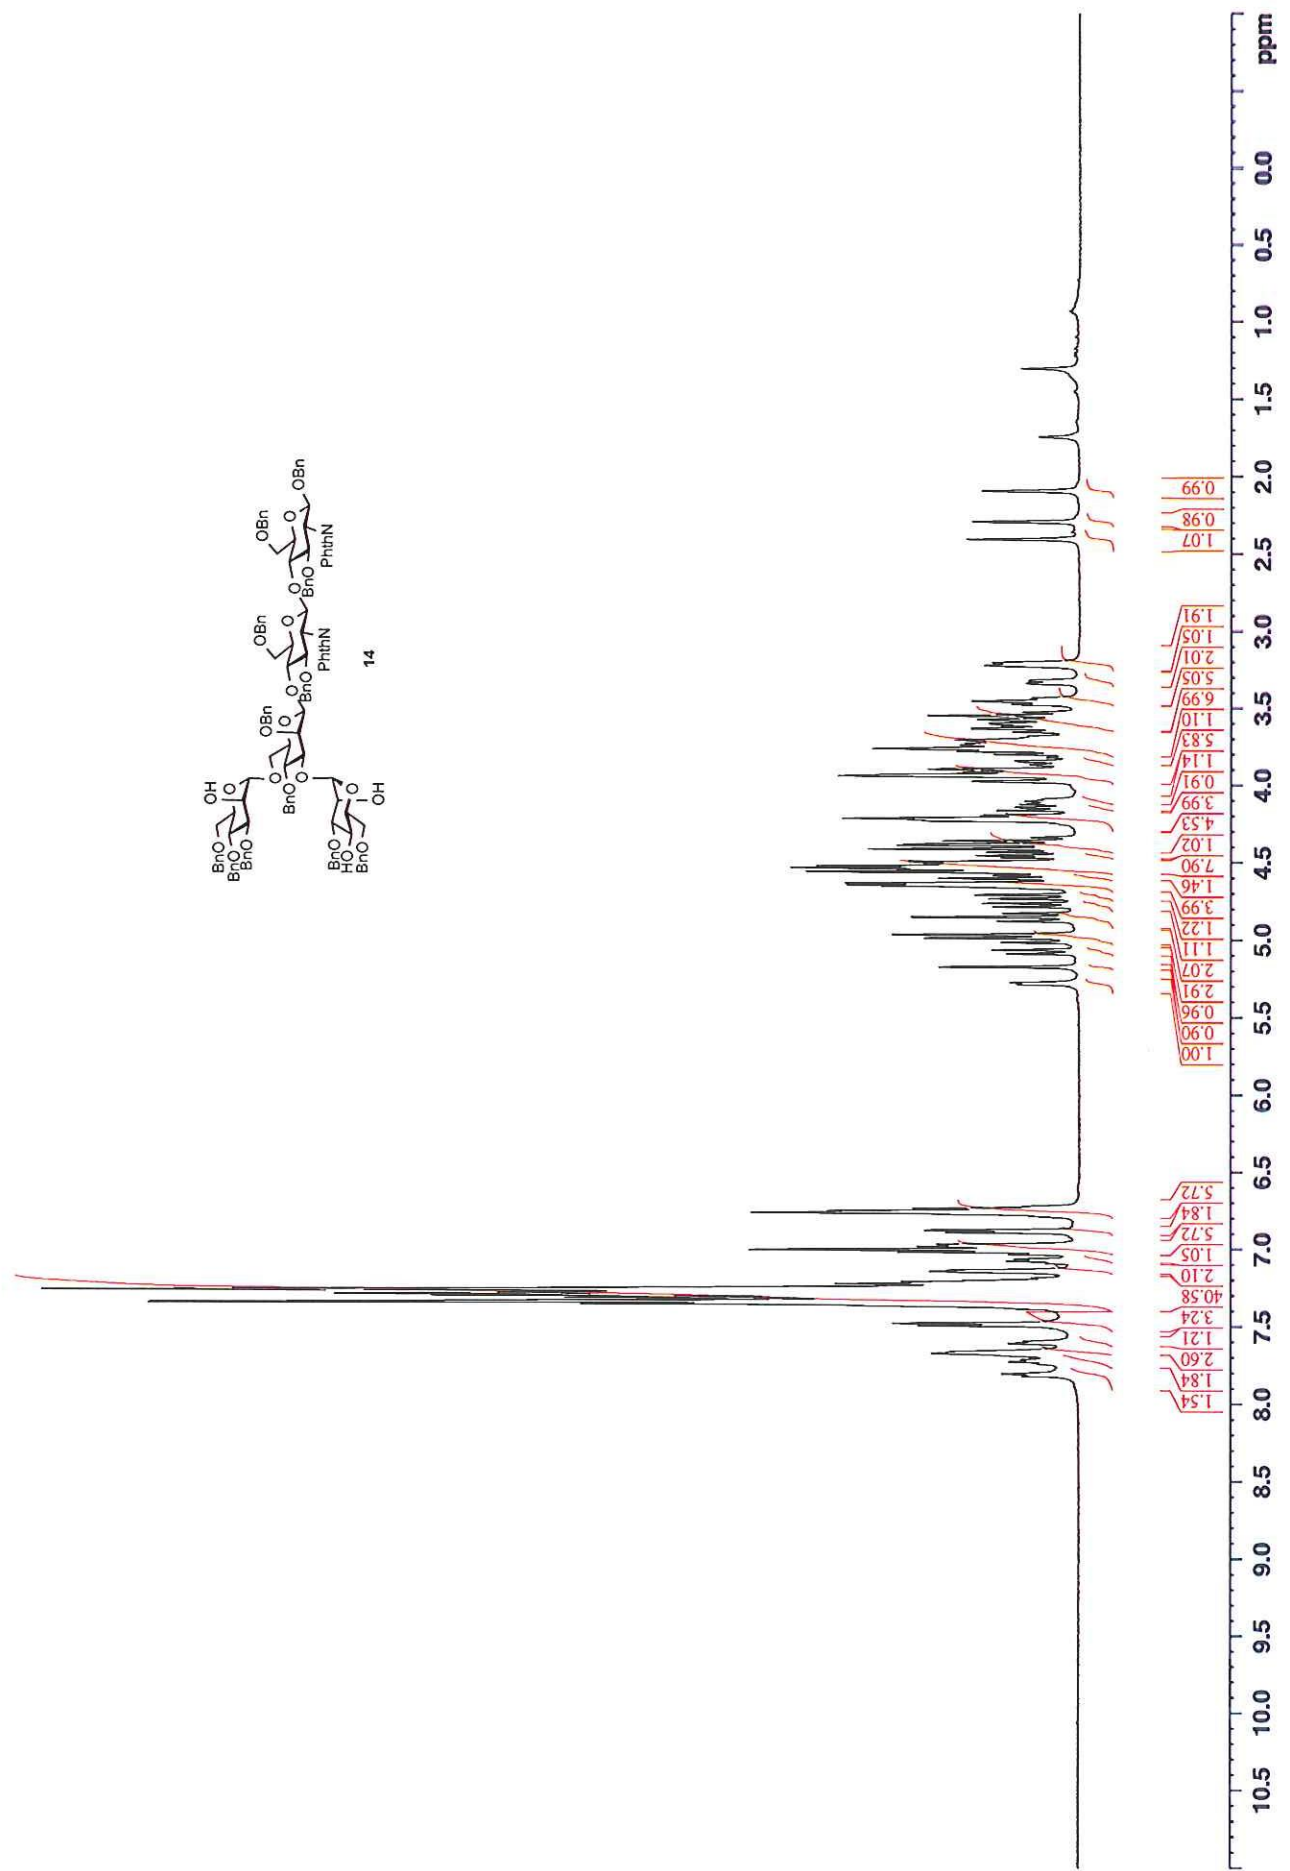



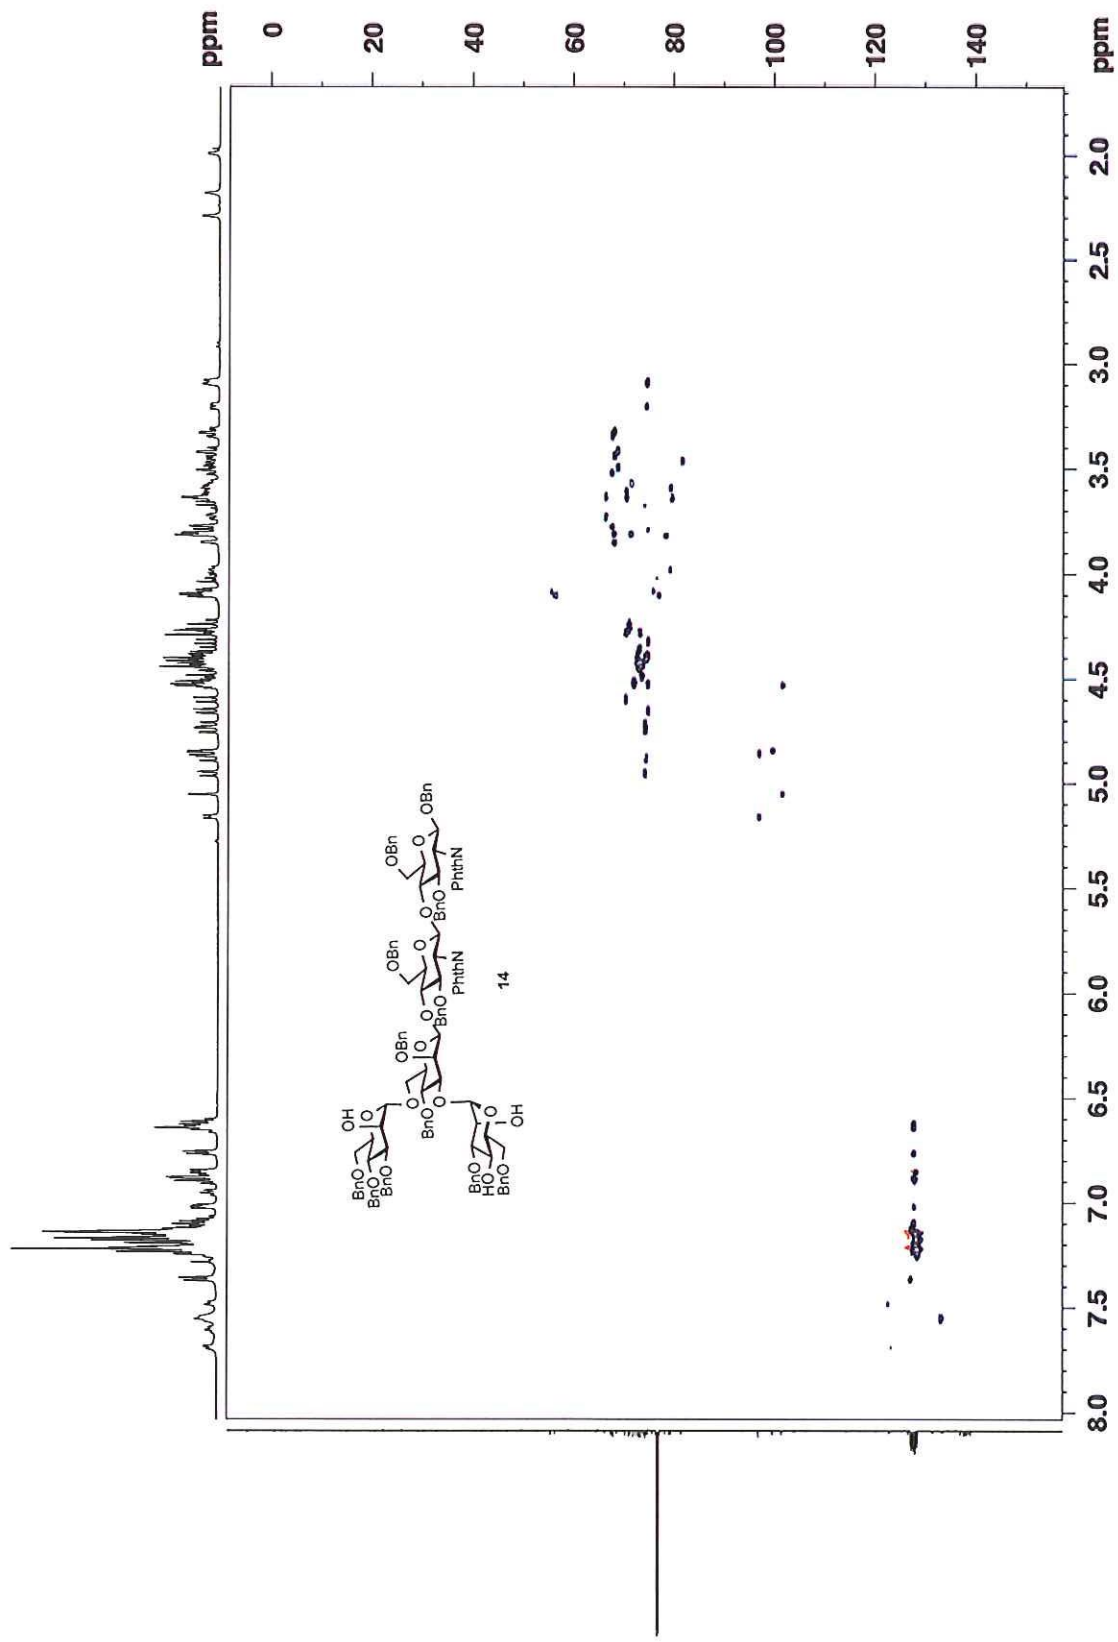





7.8422  
7.8339  
7.8277  
7.8235  
7.8171  
7.8130  
7.8106  
7.8025  
7.5330  
7.5206  
7.4591  
7.4466  
7.4366  
7.4339  
7.4024  
7.3859  
7.3732  
7.3598  
7.3516  
7.3399  
7.3274  
7.3259  
7.3183  
7.3107  
7.0010  
6.9844  
6.9713  
6.9424  
6.9301  
5.3253  
5.3153  
5.3118  
5.1711  
5.1658  
4.9593  
4.9177  
4.8981  
4.7807  
4.7608  
4.7408  
4.7281  
4.6202  
4.6008  
4.5943  
4.5780  
4.5256  
4.5055  
4.4859  
4.4452  
4.4259  
4.3906  
4.3710  
4.1341  
4.0229  
4.0738  
4.0659  
4.0522  
3.8842  
3.8810  
3.8628  
3.8280  
3.7797  
3.7705  
3.6995  
3.4325  
3.4220  
2.6339  
2.2399  
2.0786  
2.0712  
2.0633  
2.0353  
2.0226  
2.0183  
1.9966  
1.9831  
1.9807  
1.9767  
1.9766  
1.9724  
1.9677  
1.9573  
1.9473  
1.9297  
1.9183  
1.9059  
1.8809  
1.8790  
1.8582  
1.8436  
1.8397  
1.8251  
1.7981  
1.7889

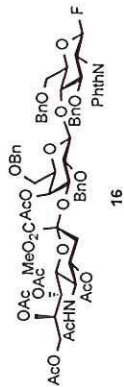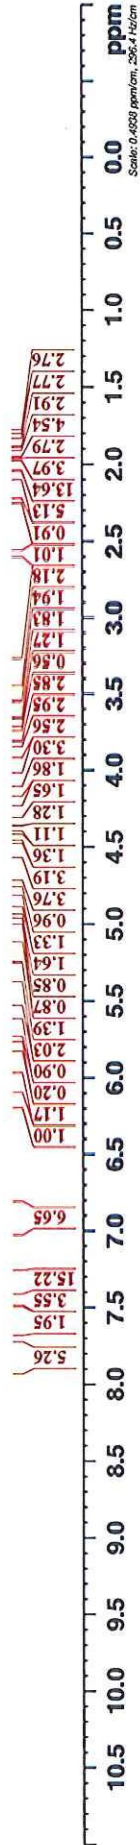

7.8355  
7.6447  
7.6324  
7.5717  
7.591  
7.5462  
7.4873  
7.4830  
7.4762  
7.4683  
7.4665  
7.4630  
7.4576  
7.4538  
7.4421  
7.4309  
7.4286  
7.4215  
7.4190  
7.4089  
7.3952  
7.1657  
7.1632  
7.1538  
7.1504  
7.0446  
7.0416  
7.0384  
7.0294  
5.3020  
5.2850  
5.2667  
5.2526  
5.2069  
5.2013  
5.1473  
5.1270  
5.0326  
5.0125  
4.9124  
4.8994  
4.8937  
4.7634  
4.7432  
4.6400  
4.6326  
4.6199  
4.6124  
4.5981  
4.5784  
4.4589  
4.4391  
4.4316  
4.4173  
4.3611  
4.3470  
4.2951  
4.2226  
3.9919  
3.9581  
3.9316  
3.9180  
3.9138  
3.9001  
3.6957  
3.6833  
3.6292  
2.2988  
2.2461  
2.2283  
2.2219  
2.2020  
2.1943  
2.1910  
2.1880  
2.1804  
2.1604  
2.1437  
2.1390  
2.1298  
2.1204  
2.0876  
2.0839  
2.0352  
2.0272  
2.0151  
2.0041  
0.0220  
0.0196  
0.0124  
0.0102  
0.0034  
-0.0002

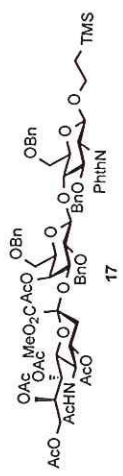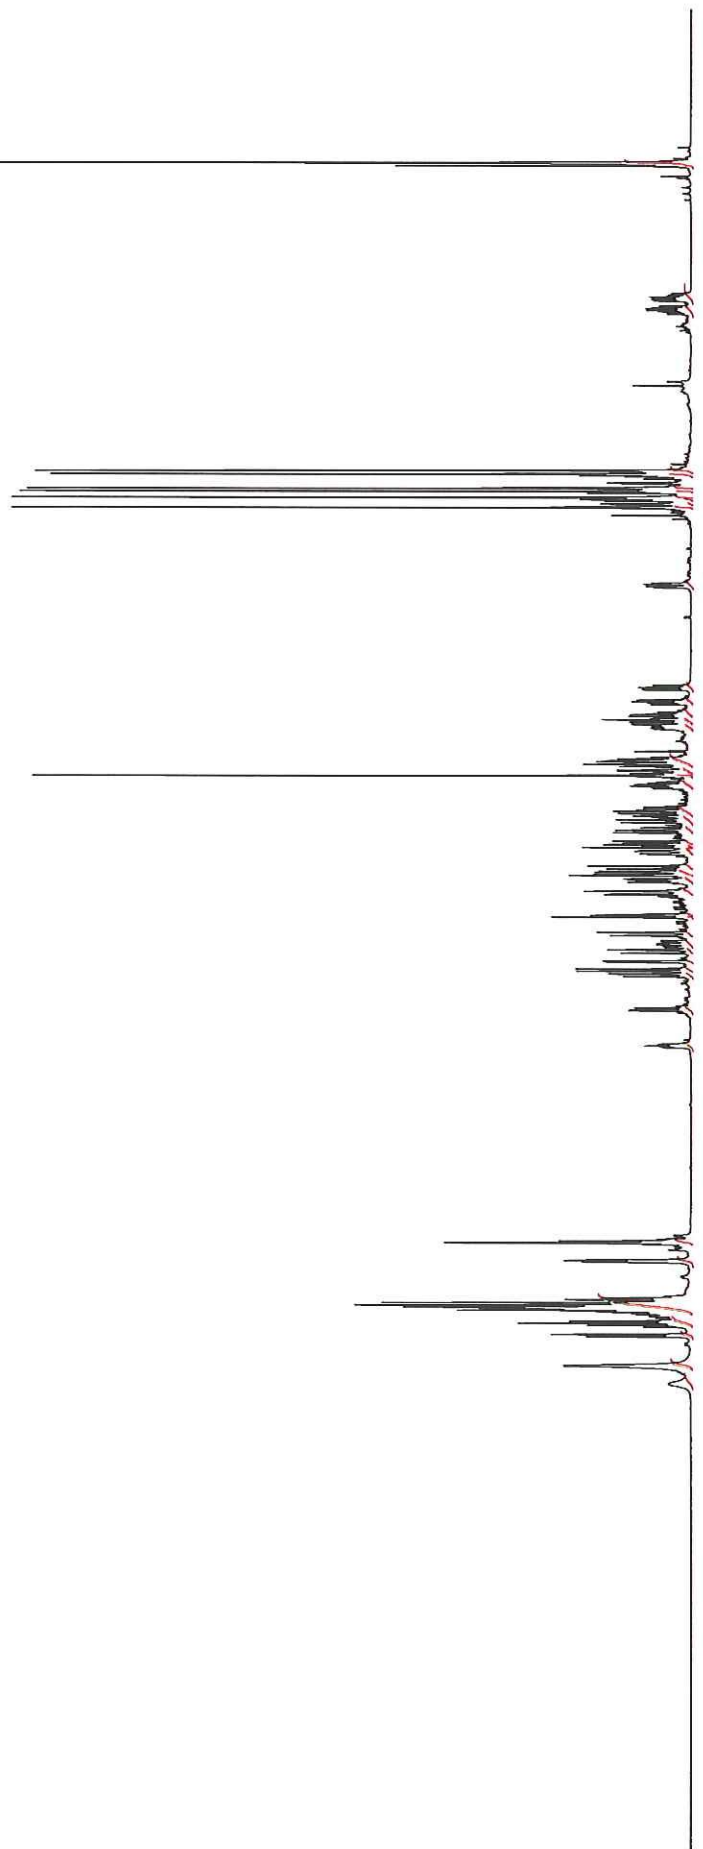

10.87  
1.33  
1.35  
3.55  
3.80  
3.09  
2.69  
2.85  
1.54  
0.91  
3.05  
1.00  
0.99  
1.17  
1.41  
1.47  
1.33  
3.70  
1.63  
2.64  
1.64  
2.36  
1.53  
1.27  
1.36  
0.87  
1.19  
1.26  
2.25  
1.33  
1.54  
0.96  
0.93  
1.10  
1.20  
0.97  
1.09  
1.21  
1.12  
1.30  
0.92  
3.03  
2.44  
15.06  
3.46  
1.92  
3.54  
1.38

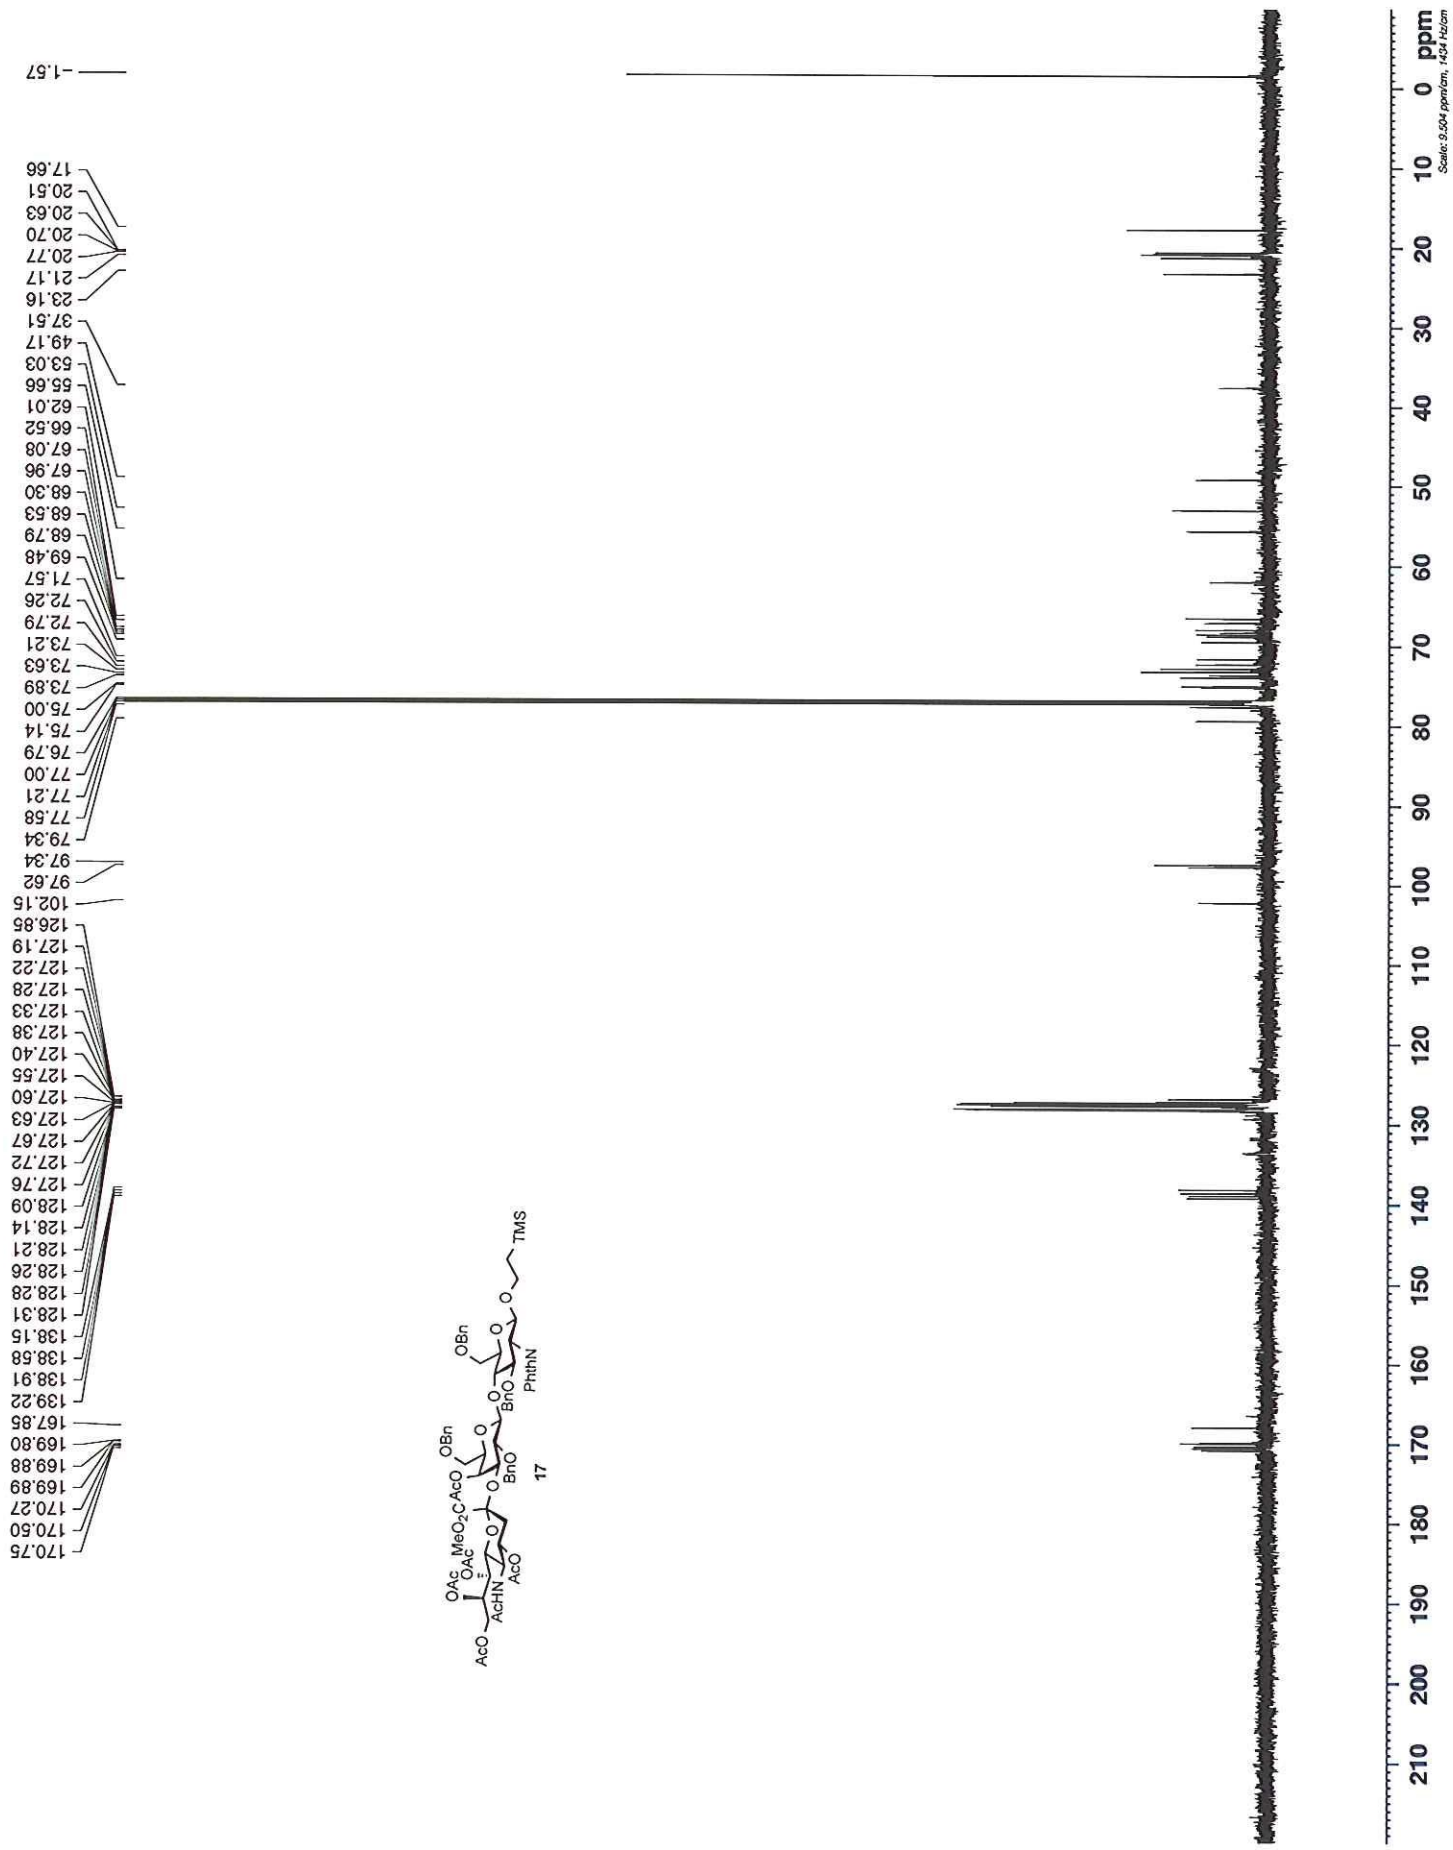

170.32  
 170.29  
 170.27  
 170.03  
 169.86  
 169.78  
 168.85  
 139.79  
 139.75  
 139.30  
 139.02  
 138.86  
 138.43  
 132.23  
 130.13  
 129.17  
 128.77  
 128.48  
 128.45  
 127.73  
 127.22  
 127.11  
 123.18  
 103.02  
 97.75  
 93.60  
 80.28  
 78.16  
 77.79  
 75.87  
 75.76  
 74.42  
 74.11  
 73.39  
 73.33  
 72.78  
 72.18  
 69.69  
 69.28  
 69.20  
 68.87  
 68.24  
 67.24  
 62.60  
 58.23  
 53.07  
 49.02  
 38.43  
 23.07  
 21.33  
 20.82  
 20.53  
 20.44  
 20.39

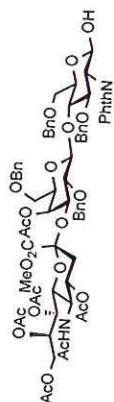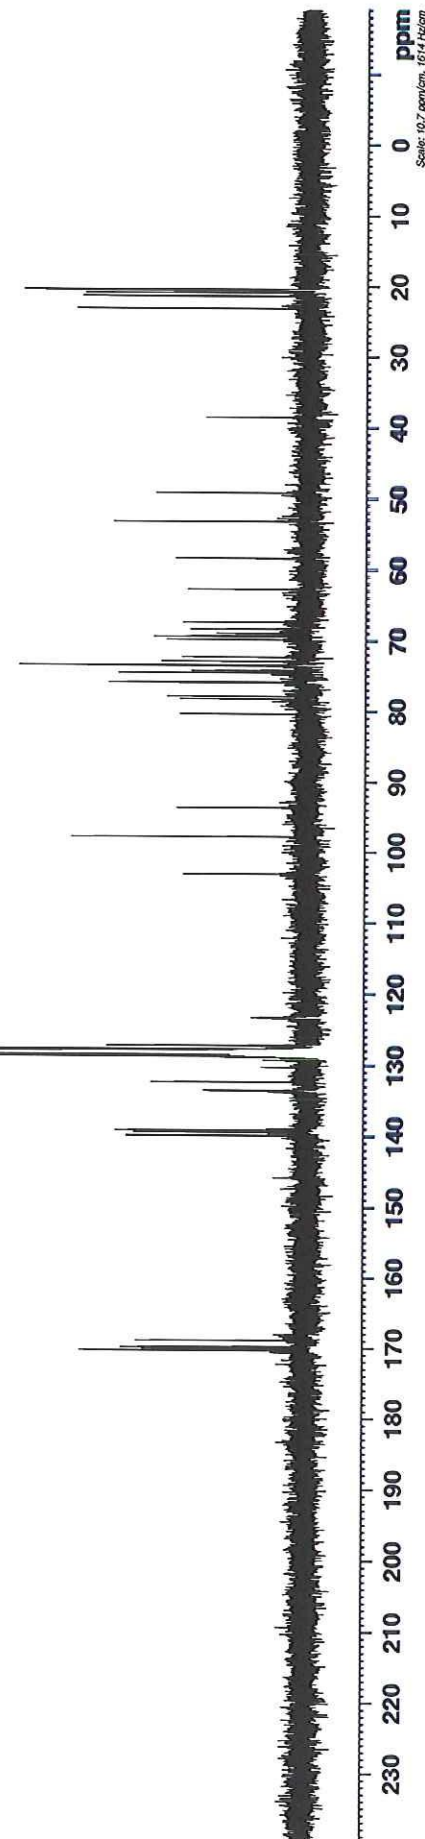

1.5951  
1.6136  
1.6313  
1.6398  
1.6433  
1.6529  
1.6749  
1.6846  
1.7063  
1.7238  
1.7559  
1.7812  
1.8107  
1.8604  
1.8616  
1.8965  
1.9131  
1.9235  
1.9596  
1.9914  
2.0899  
2.0940  
2.0940  
3.3631  
3.3830  
3.6772  
3.6814  
3.6995  
3.7902  
3.9070  
3.9230  
4.2137  
4.2218  
4.2418  
4.3791  
4.3989  
4.4296  
4.4383  
4.4557  
4.5684  
4.6023  
4.6224  
4.7238  
4.7339  
4.7384  
4.7539  
4.7639  
4.7638  
4.8671  
4.8876  
4.9563  
5.0199  
5.0406  
5.1145  
5.1271  
5.2316  
5.2514  
5.4569  
5.4624  
5.5015  
5.5058  
5.6799  
5.7817  
5.7961  
5.8085  
5.8173  
5.8200  
5.8222  
5.8261  
5.8362  
5.8412  
5.8452  
5.8502  
7.1127  
7.1249  
7.1368  
7.1566  
7.1604  
7.1708  
7.1835  
7.1853  
7.1980  
7.2093  
7.2370  
7.2419  
7.2504  
7.2644  
7.2776  
7.3261  
7.3620  
7.3742  
7.3844  
7.3972  
7.4916  
7.5040  
7.5410  
7.5533

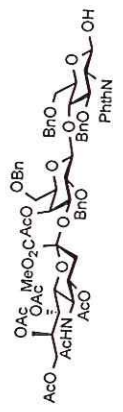

18

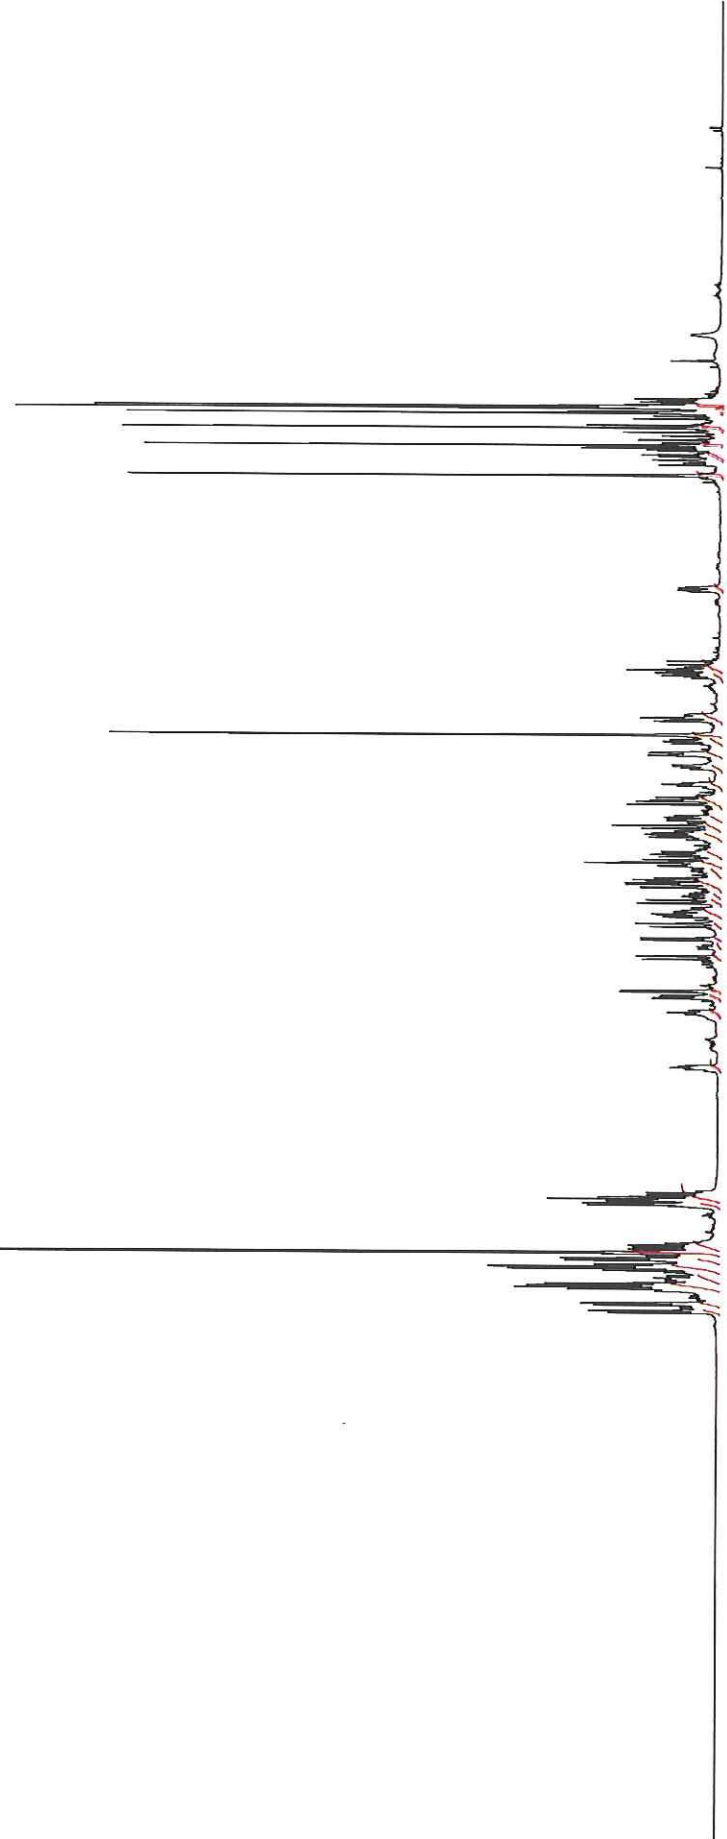

1.83  
2.18  
5.41  
2.49  
5.33  
2.48  
10.82  
2.93  
2.21  
4.24  
1.15  
1.29  
1.30  
1.49  
1.01  
0.49  
0.81  
0.85  
2.27  
1.21  
0.97  
3.30  
1.20  
2.65  
1.58  
2.10  
1.86  
1.37  
2.60  
1.48  
1.21  
1.76  
1.34  
3.32  
2.31  
1.10  
2.23  
1.00  
3.08  
1.86  
2.49  
3.19  
1.82  
2.80  
3.28

10.5 10.0 9.5 9.0 8.5 8.0 7.5 7.0 6.5 6.0 5.5 5.0 4.5 4.0 3.5 3.0 2.5 2.0 1.5 1.0 0.5 0.0 ppm

Scale: 0.4933 ppm/cm, 28C, 4 Hz/cm

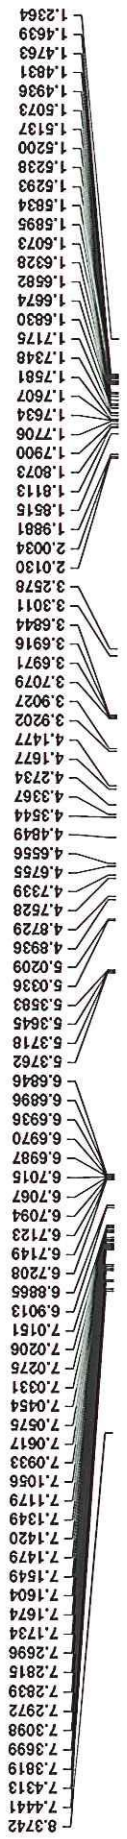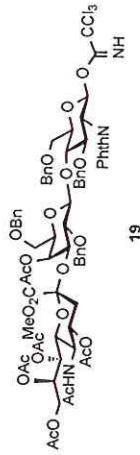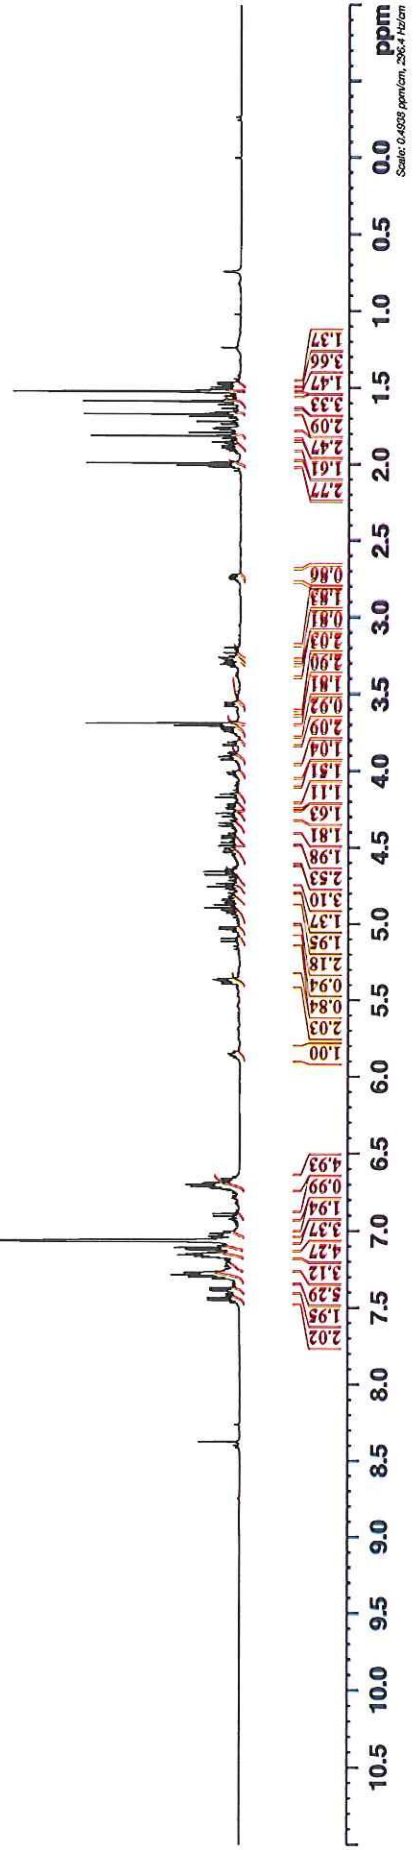

170.15  
170.03  
169.97  
169.92  
169.85  
169.72  
169.66  
169.24  
168.61  
160.95  
139.39  
139.06  
138.97  
138.76  
133.33  
131.83  
129.05  
128.52  
128.38  
128.35  
128.31  
128.29  
128.25  
128.18  
128.07  
128.01  
127.94  
127.86  
127.84  
127.78  
127.70  
127.62  
127.38  
127.33  
126.91  
122.95  
102.70  
97.51  
94.58  
90.82  
79.79  
77.27  
77.11  
76.62  
75.65  
75.47  
74.07  
73.80  
73.13  
72.94  
72.52  
71.97  
69.37  
69.02  
68.96  
68.01  
67.87  
66.97  
62.33  
55.14  
52.77  
48.74  
38.13  
22.78  
21.07  
21.05  
20.56  
20.25  
20.18  
20.10

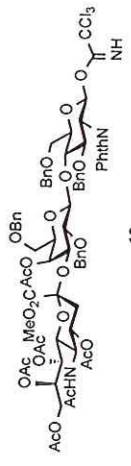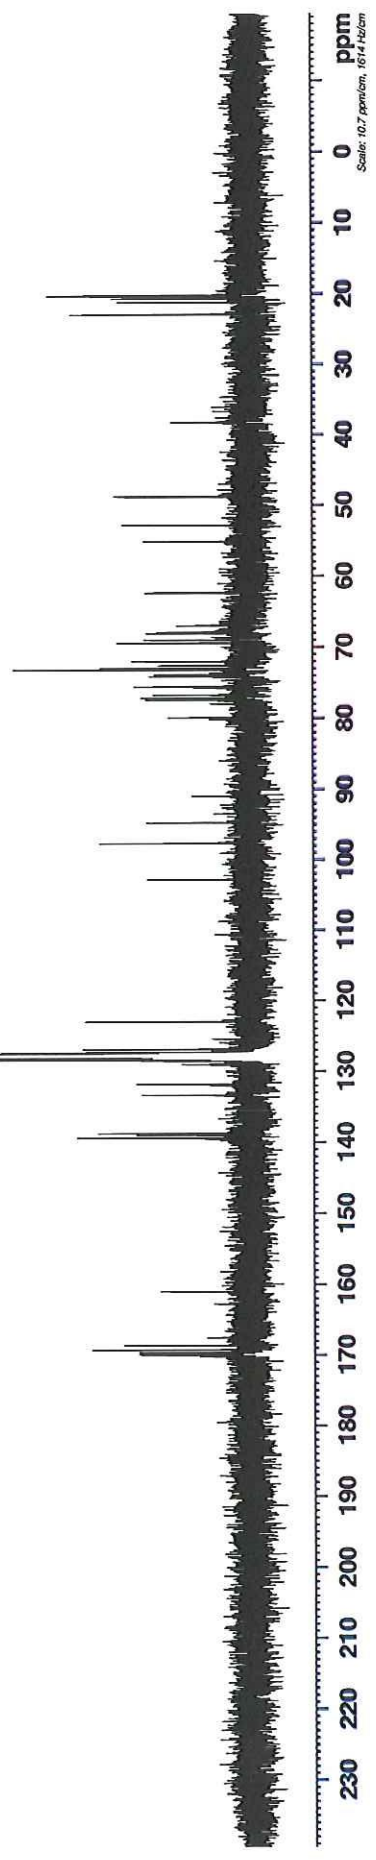

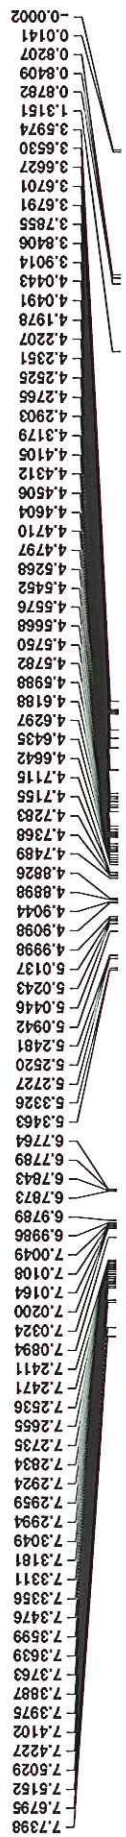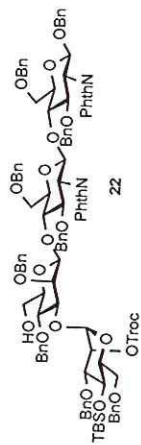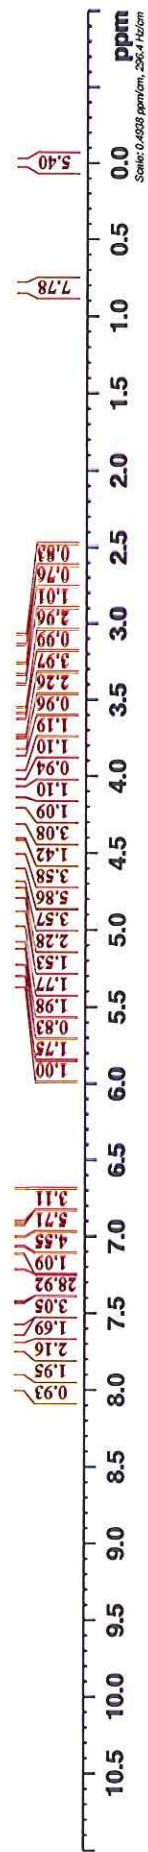



1.1843  
 1.4704  
 3.8099  
 3.8305  
 3.8510  
 3.9715  
 3.9779  
 3.9912  
 3.9975  
 4.1116  
 4.1307  
 4.1509  
 4.1642  
 4.1753  
 4.1848  
 4.2725  
 4.2823  
 4.2923  
 4.3015  
 4.3119  
 4.3213  
 4.6479  
 4.6591  
 4.6726  
 4.6834  
 4.6959  
 4.7103  
 4.7194  
 4.7341  
 4.7449  
 4.7903  
 4.7903  
 5.2304  
 5.4094  
 5.4155  
 5.4981  
 5.5969  
 7.1904  
 7.2182  
 7.2402  
 7.2479  
 7.2546  
 7.2688  
 7.2843  
 7.3000  
 7.3143  
 7.3283  
 7.3400  
 7.3791  
 7.3818  
 7.3927  
 7.4110  
 7.4351  
 7.4491

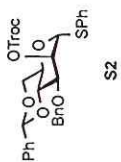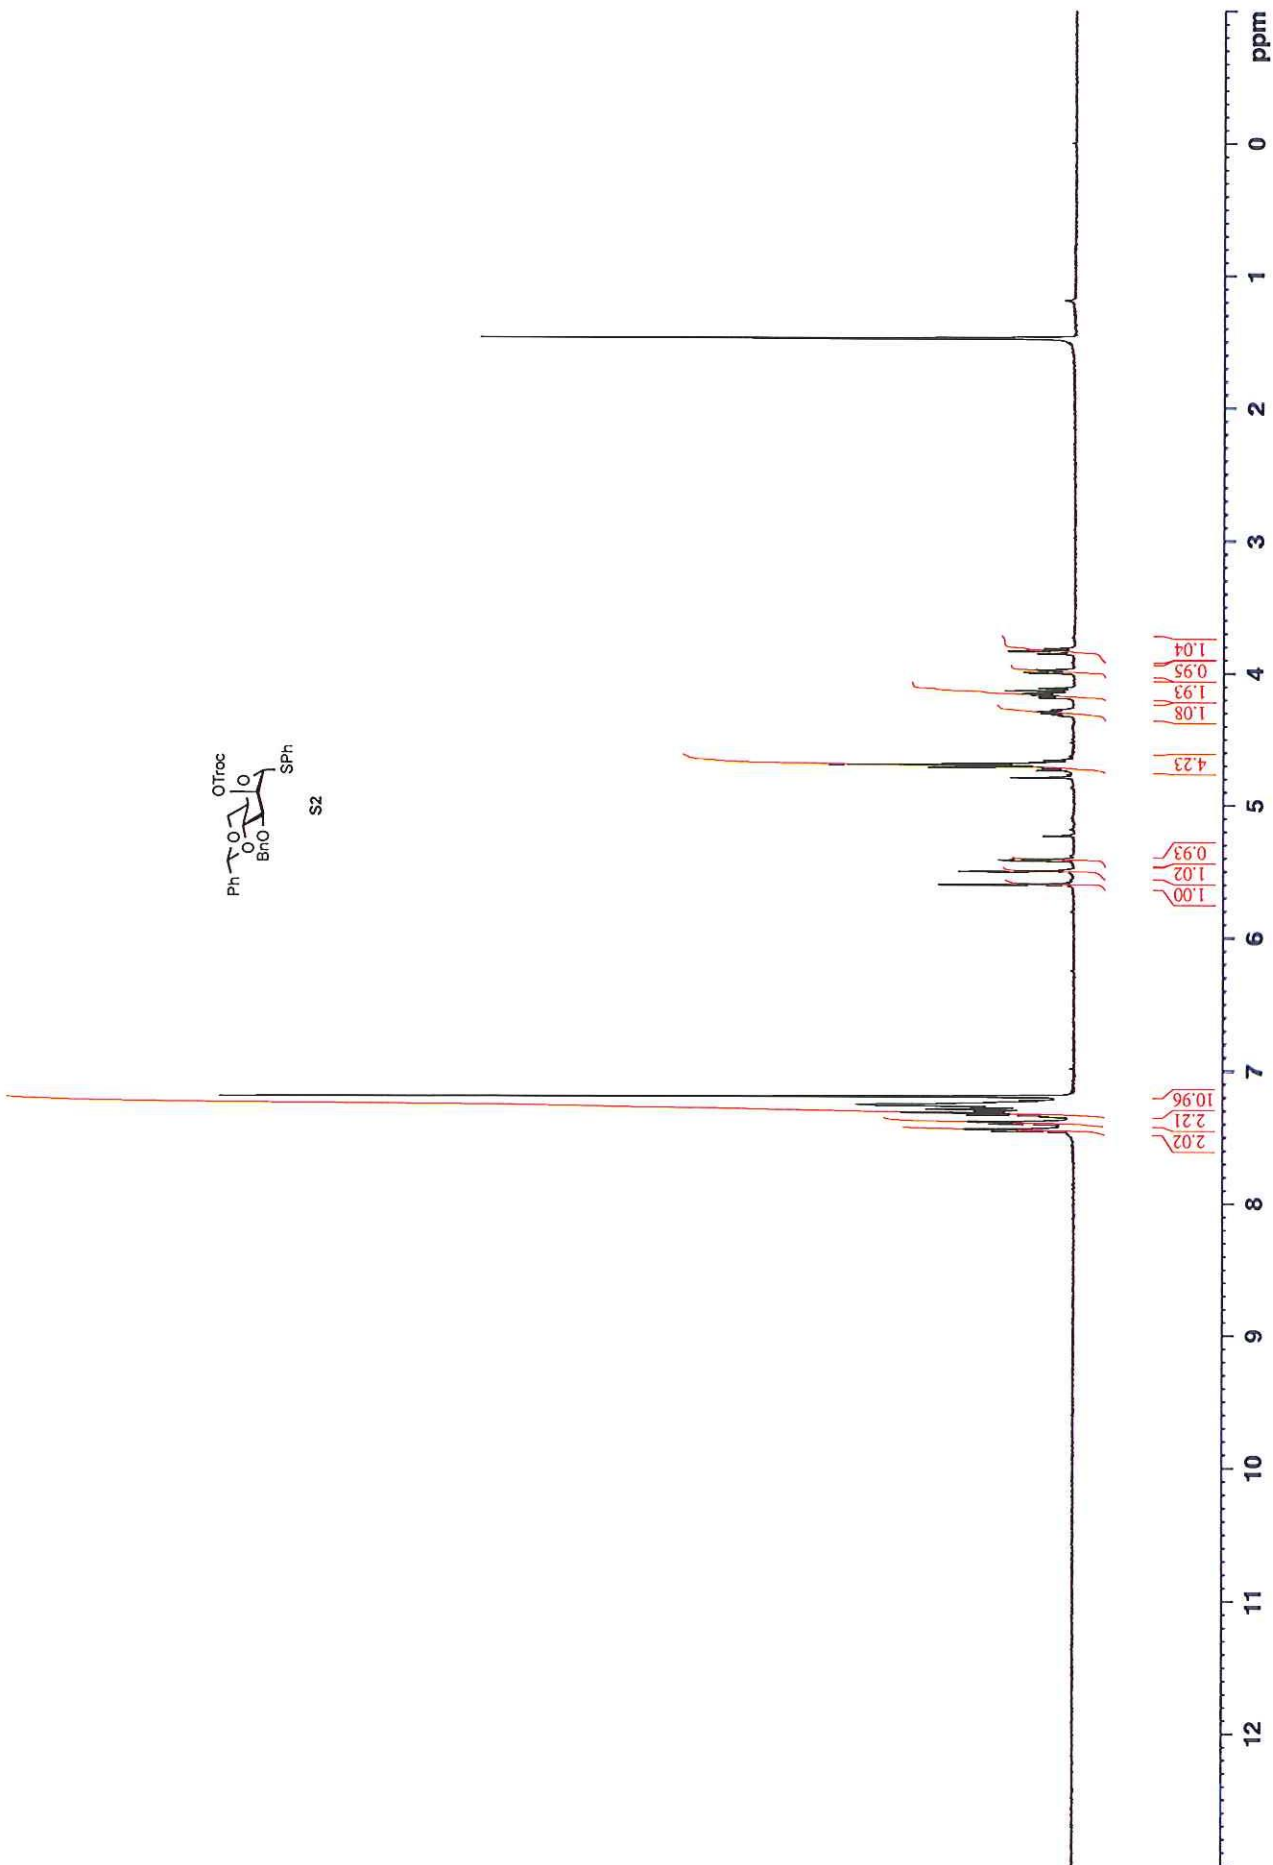

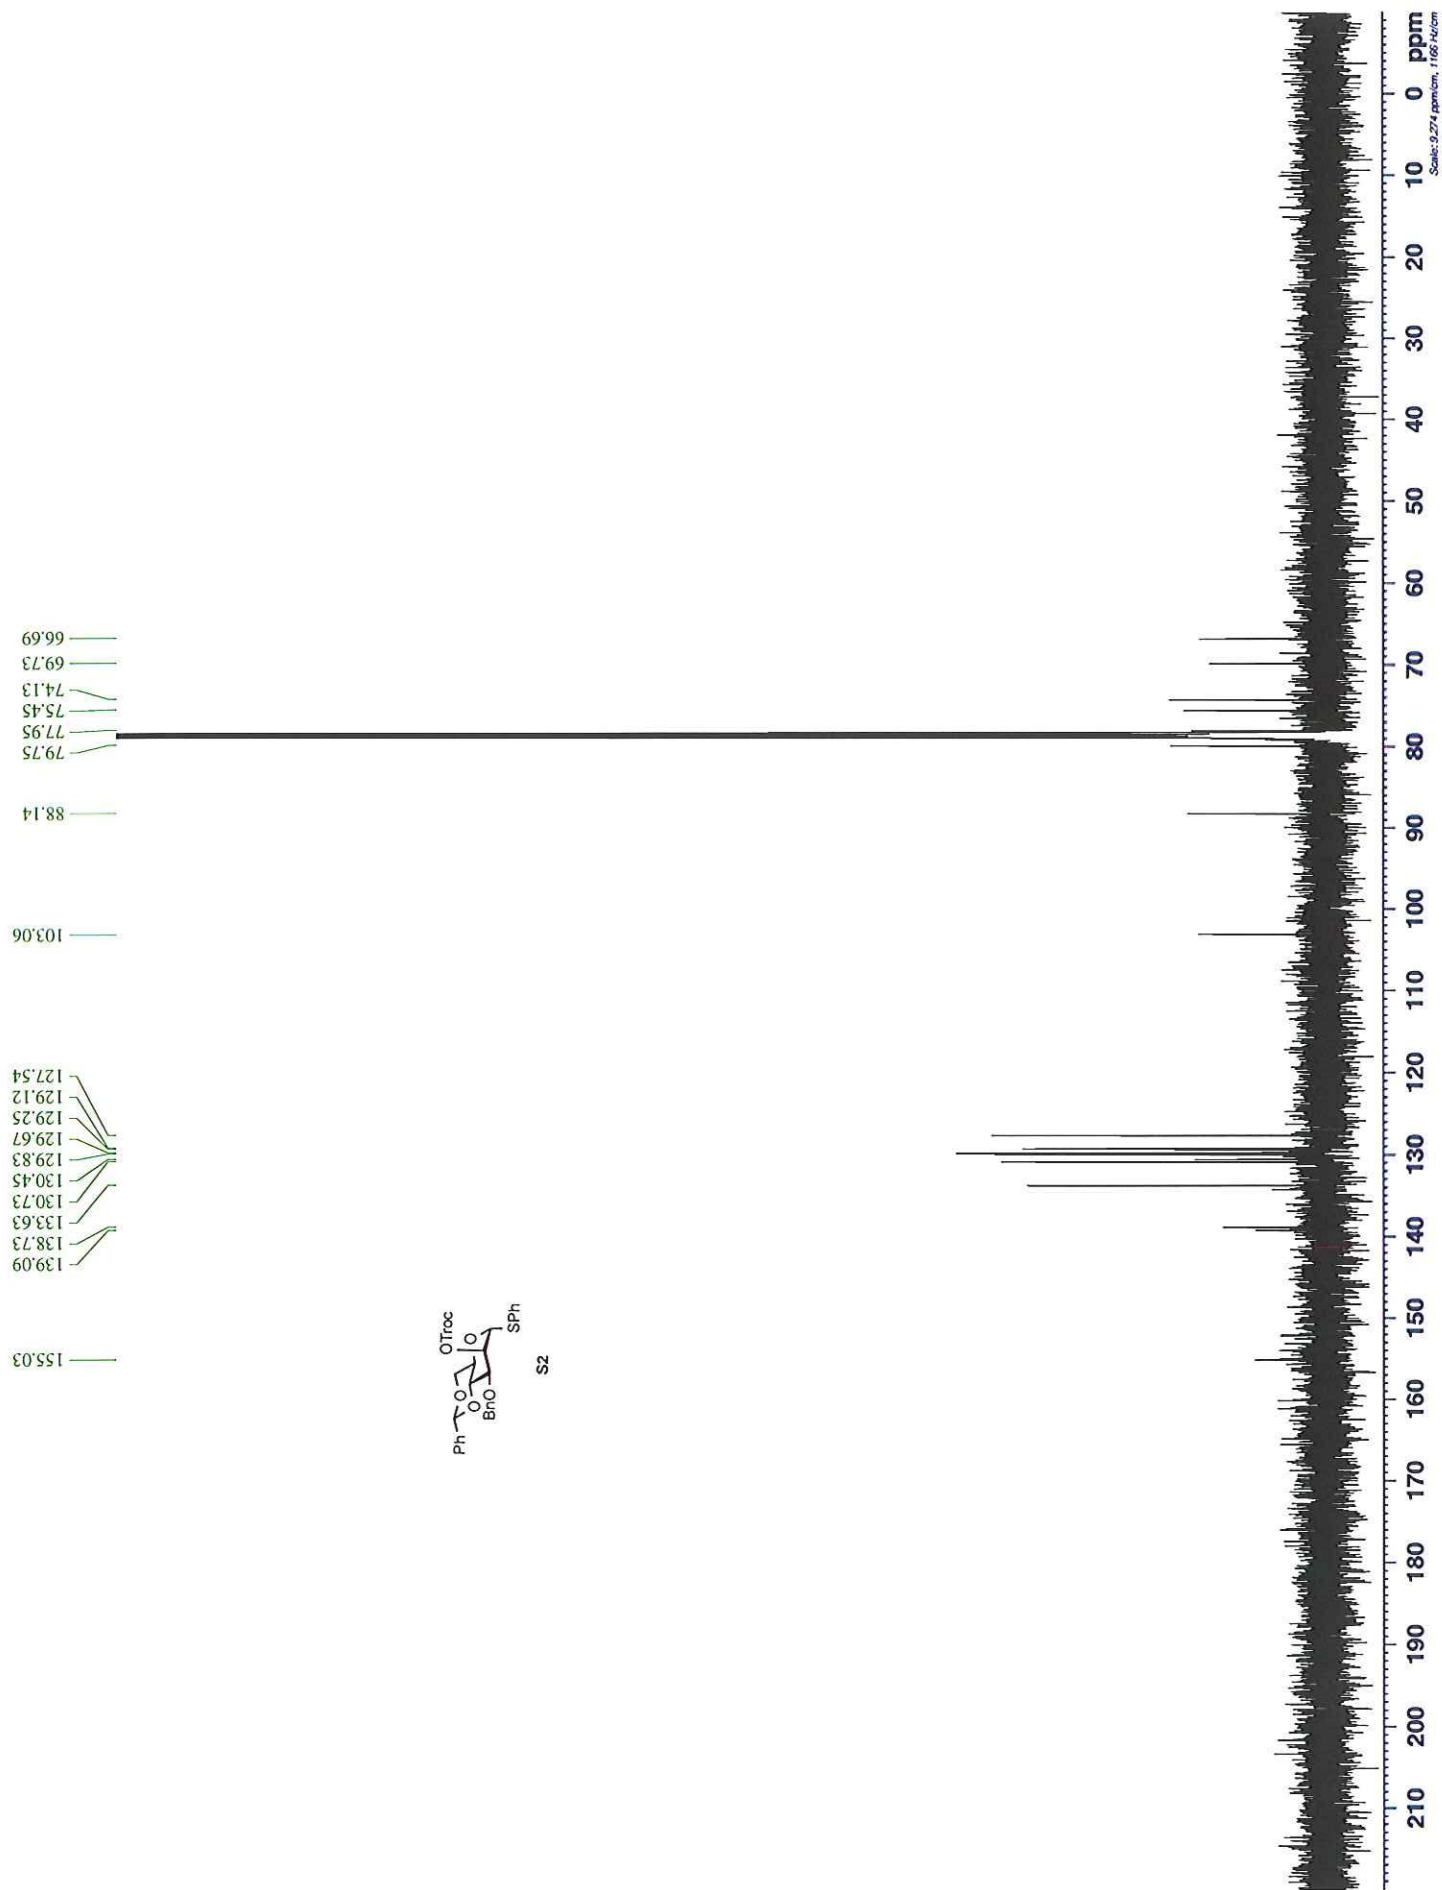

7.5484  
 7.5457  
 7.5335  
 7.5298  
 7.514  
 7.342  
 7.3249  
 7.3125  
 7.3080  
 7.3059  
 7.2983  
 7.2876  
 7.2828  
 7.2782  
 7.2694  
 7.2627  
 7.2573  
 7.2490  
 7.2423  
 7.2304  
 7.2244  
 5.5832  
 5.5805  
 5.4069  
 5.4033  
 5.4013  
 5.3978  
 5.3978  
 4.7411  
 4.7174  
 4.7100  
 4.7023  
 4.6872  
 4.6788  
 4.5763  
 4.5711  
 4.5480  
 4.3695  
 4.3664  
 4.3570  
 4.3522  
 4.3478  
 4.3384  
 4.3351  
 4.0150  
 3.9968  
 3.9783  
 3.8393  
 3.8355  
 3.8177  
 3.8141  
 3.7836  
 3.7709  
 3.7621  
 3.7493  
 3.7403  
 3.7343  
 3.7225  
 3.7164  
 1.5623  
 1.2662  
 0.0819  
 0.0237  
 0.0020

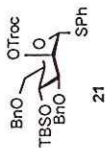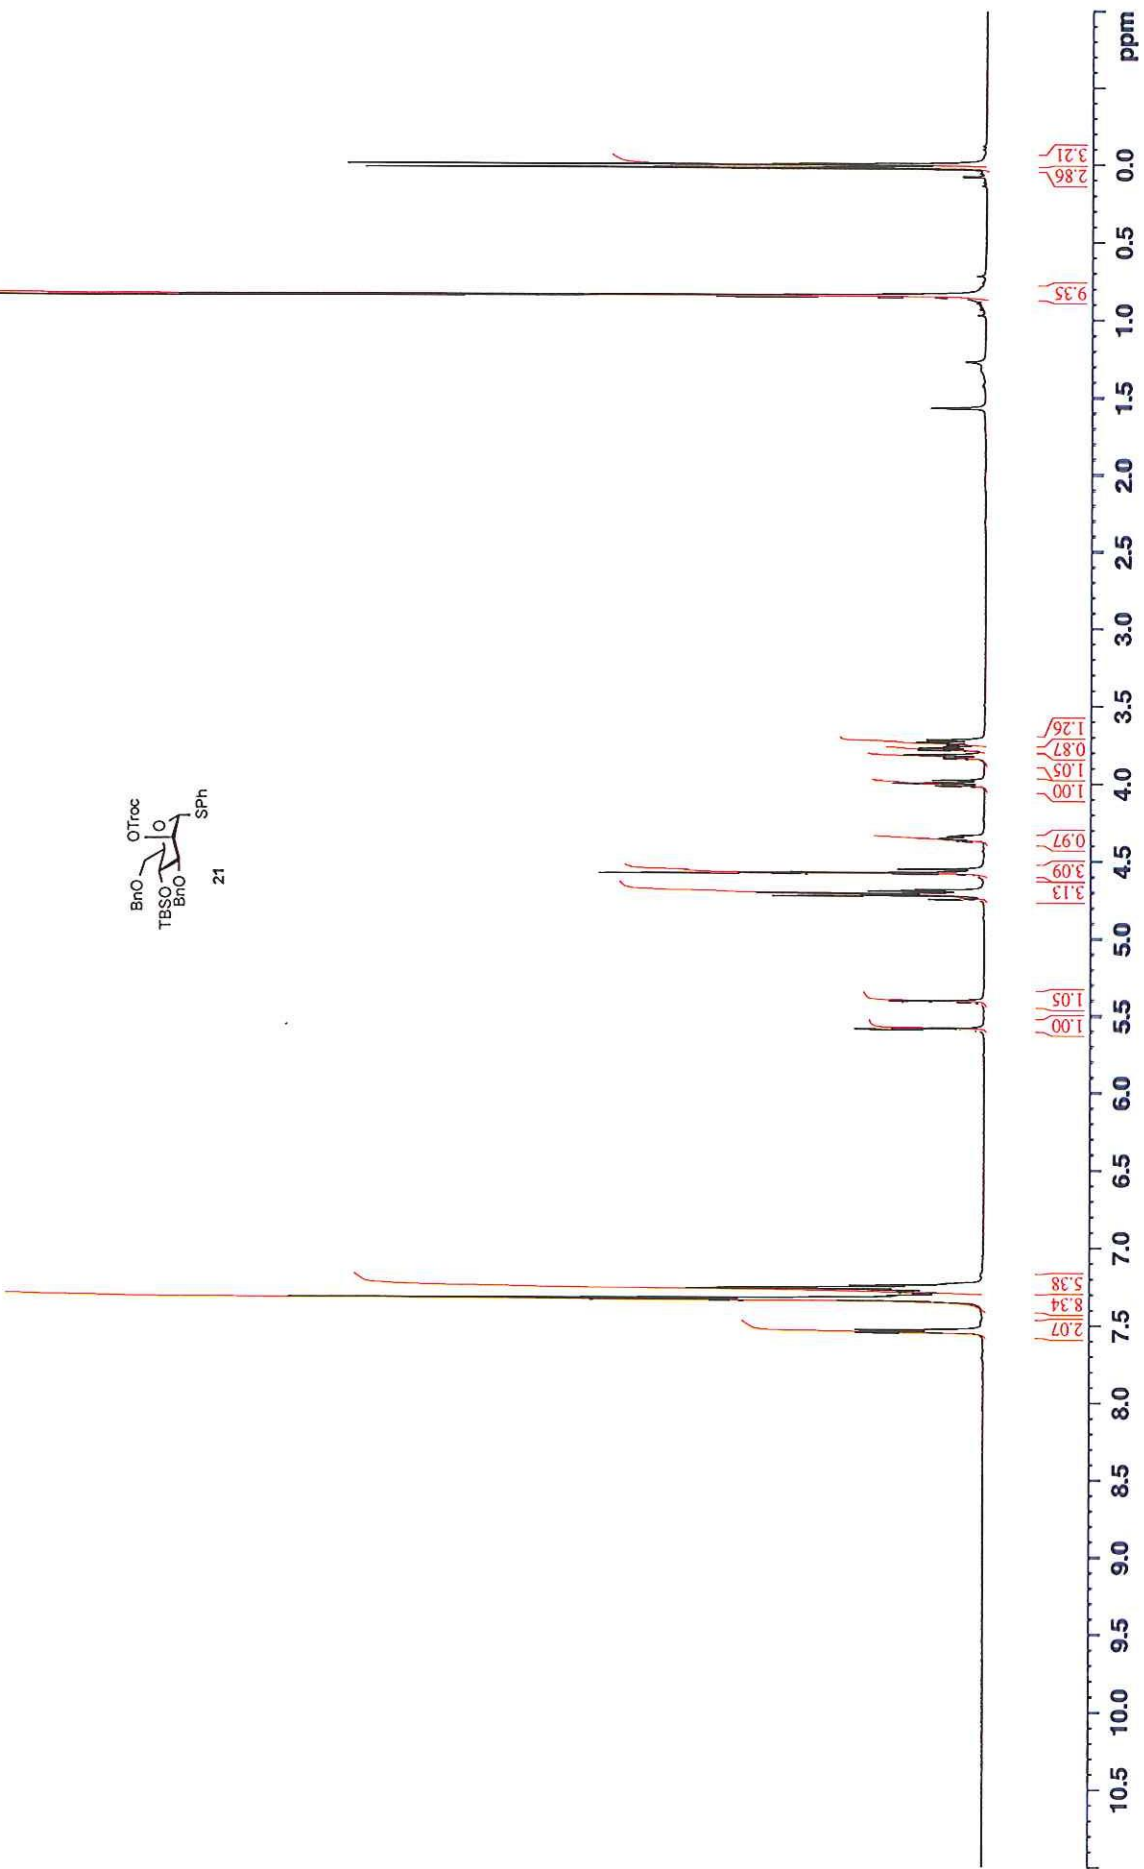

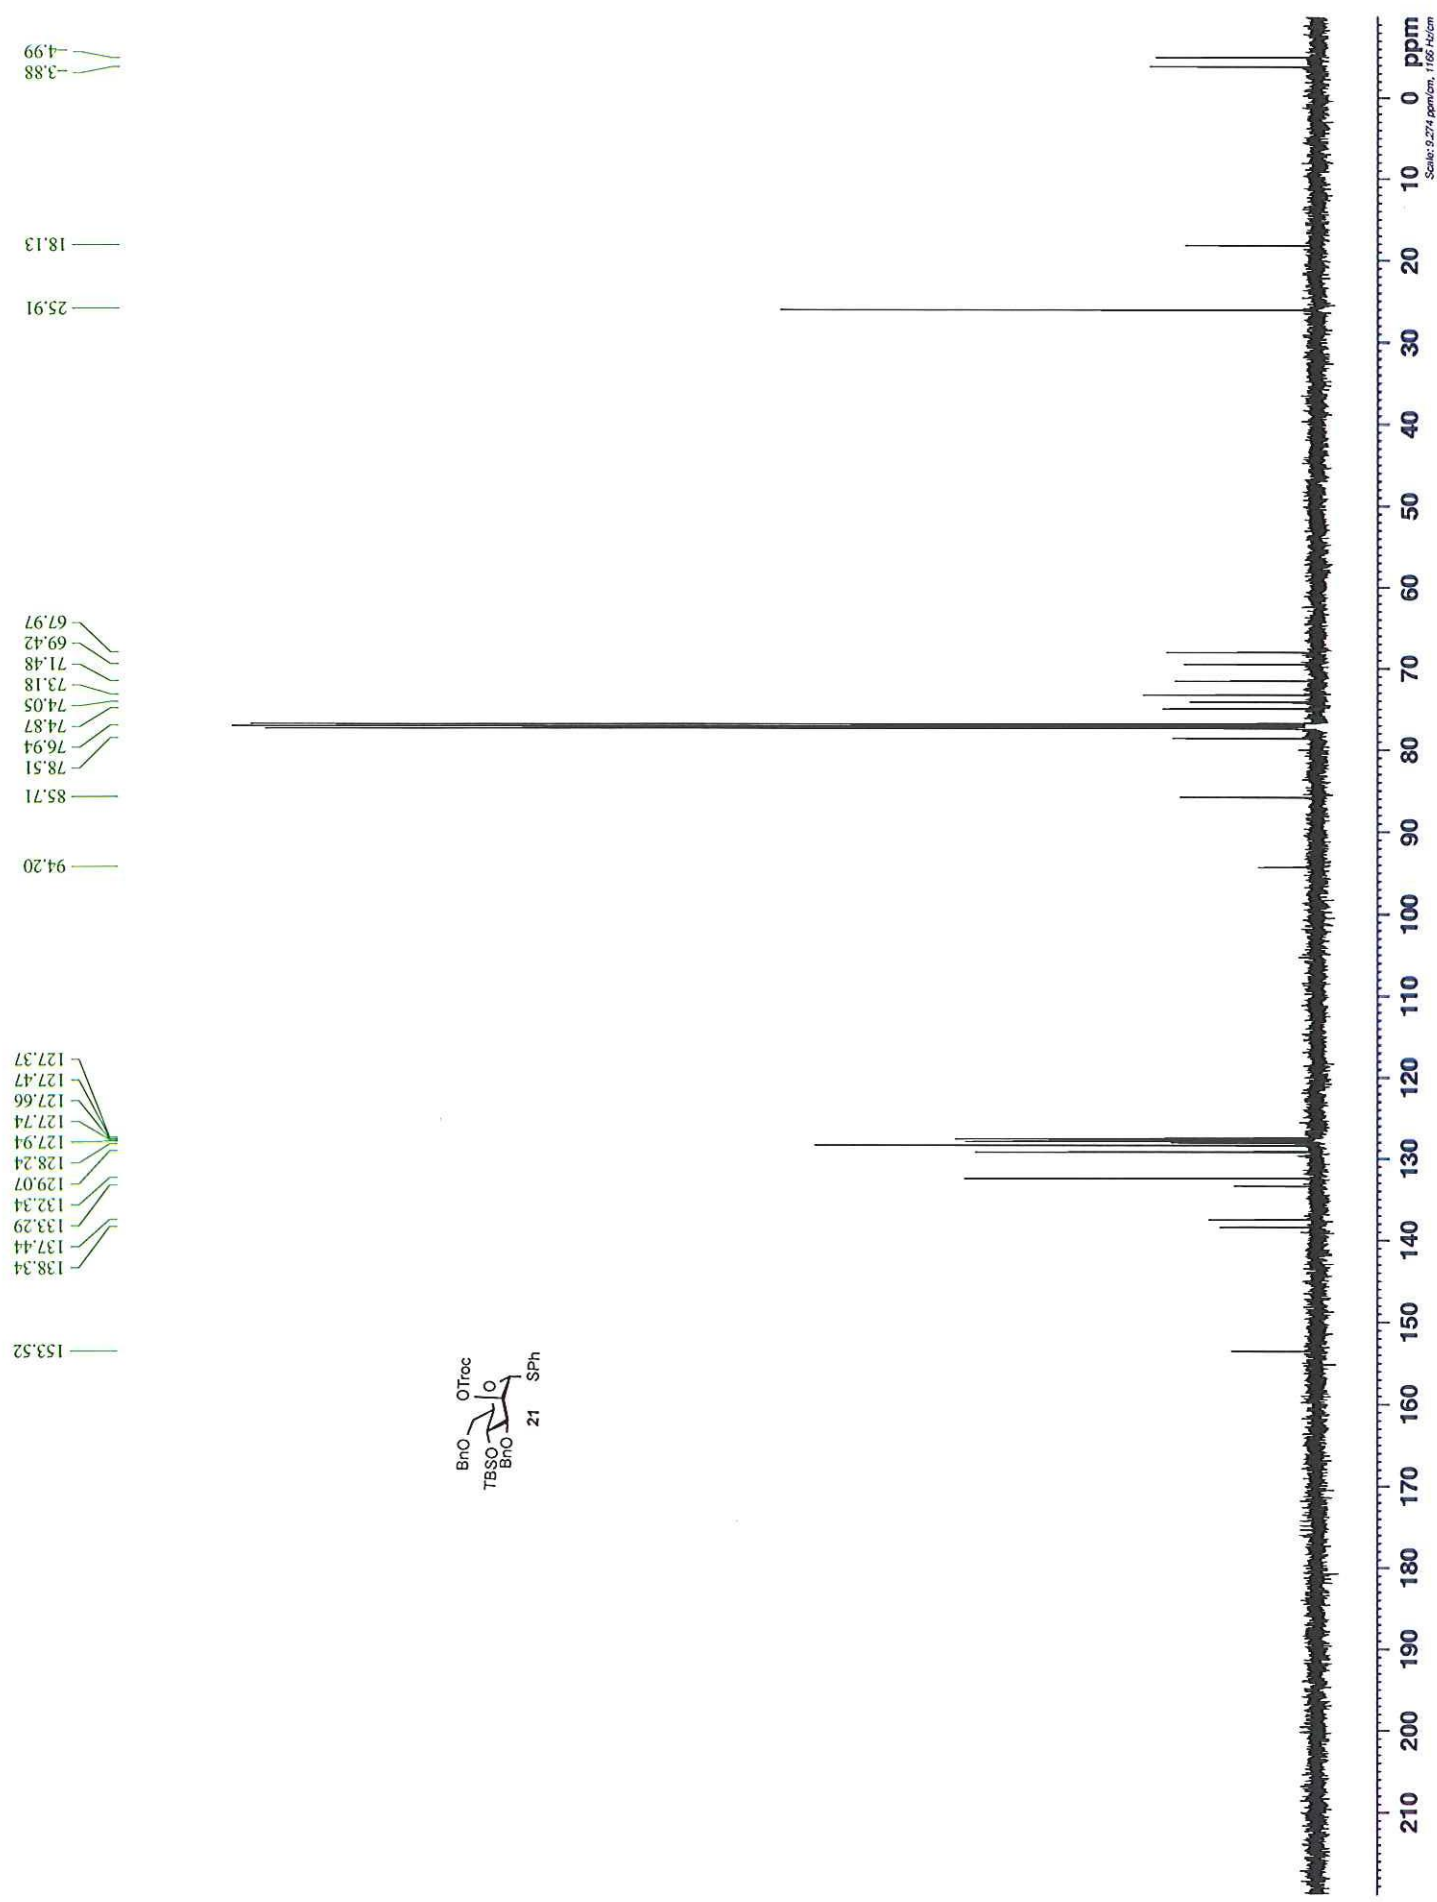

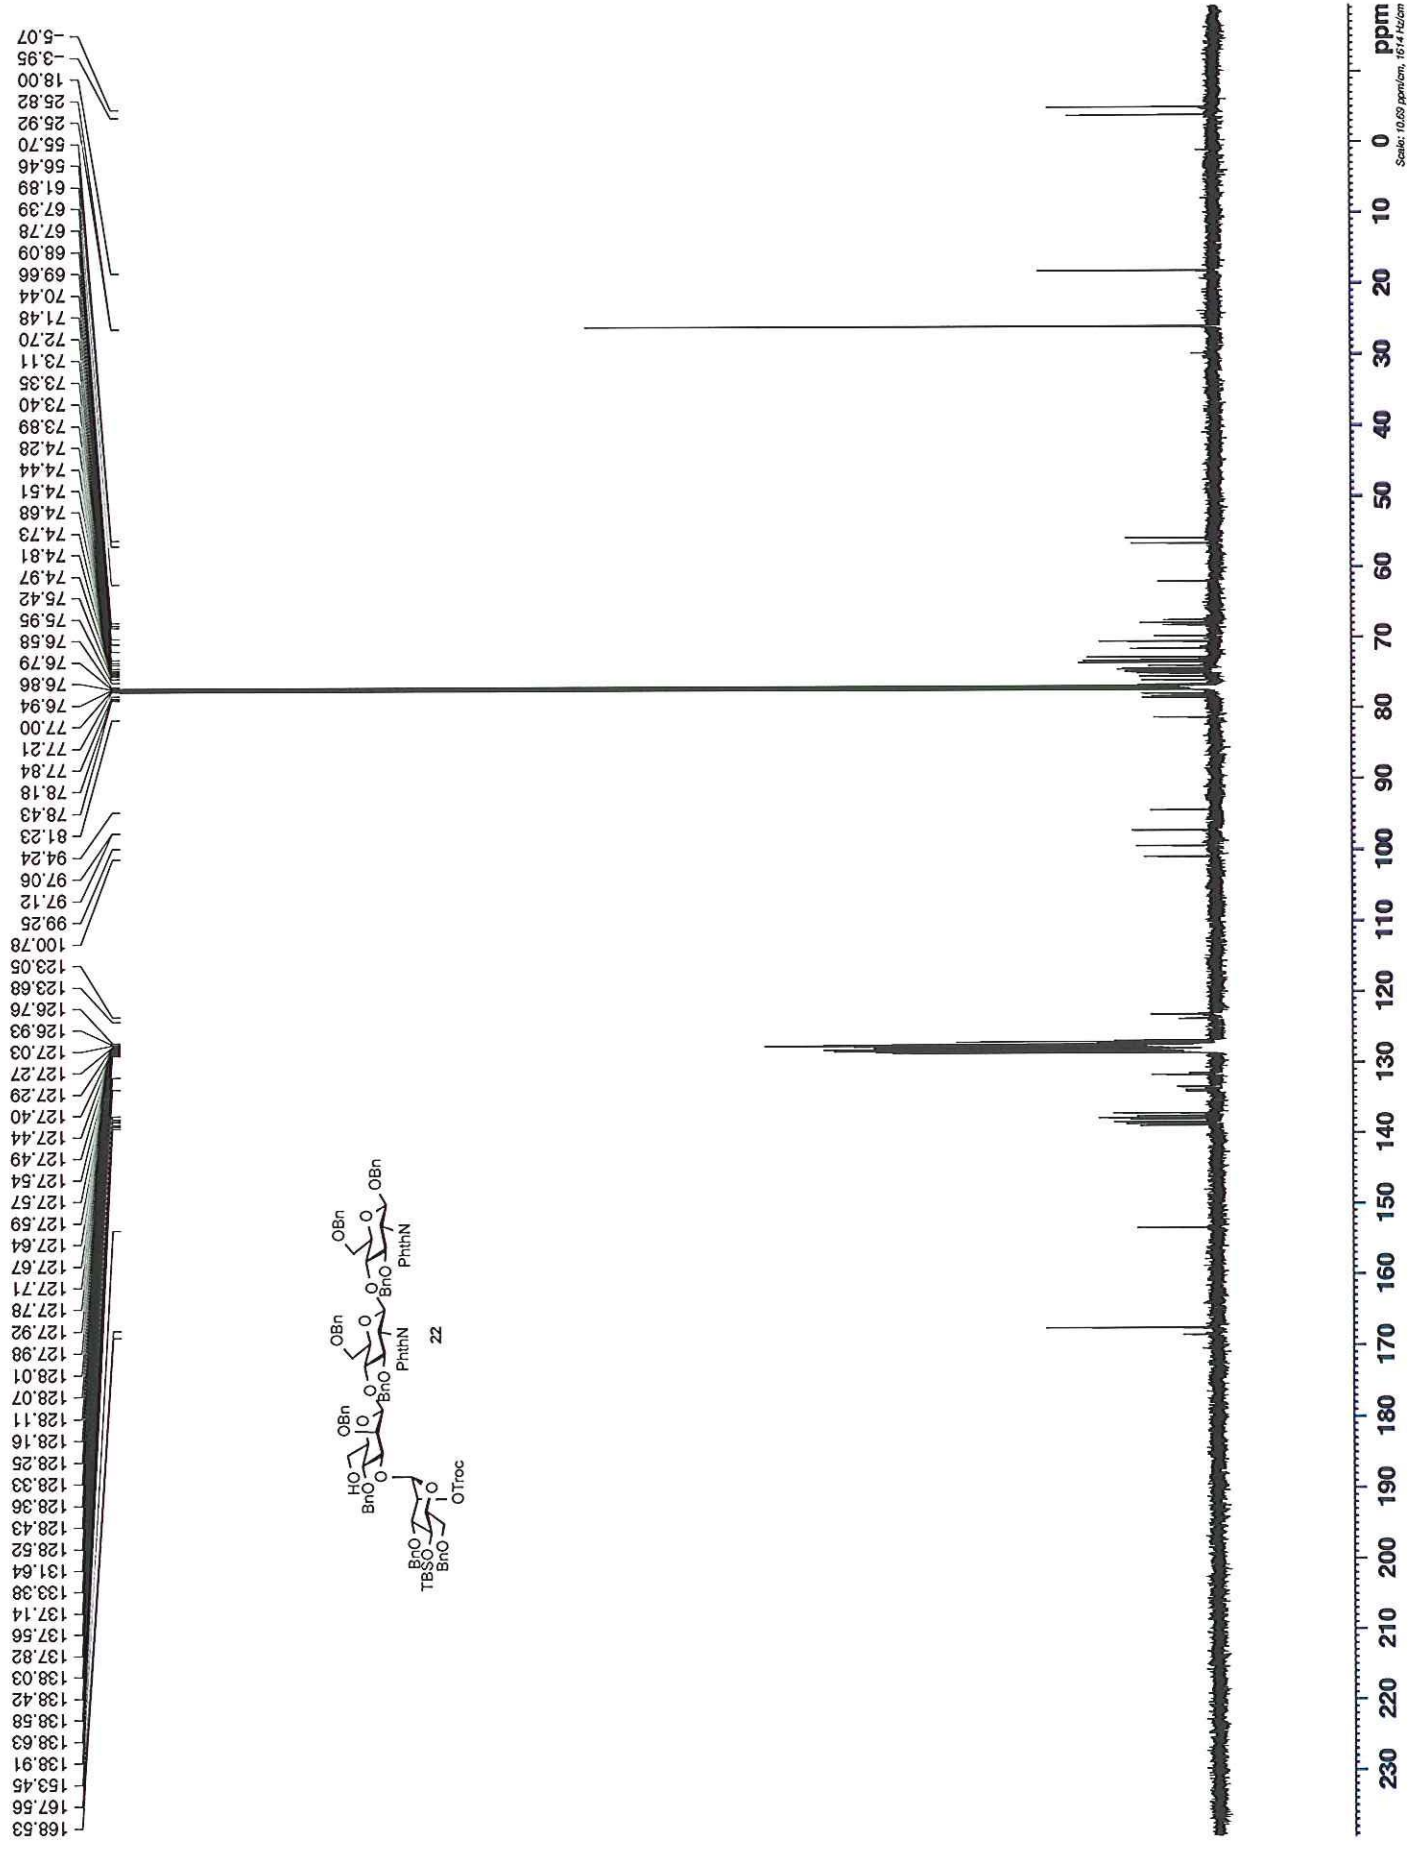

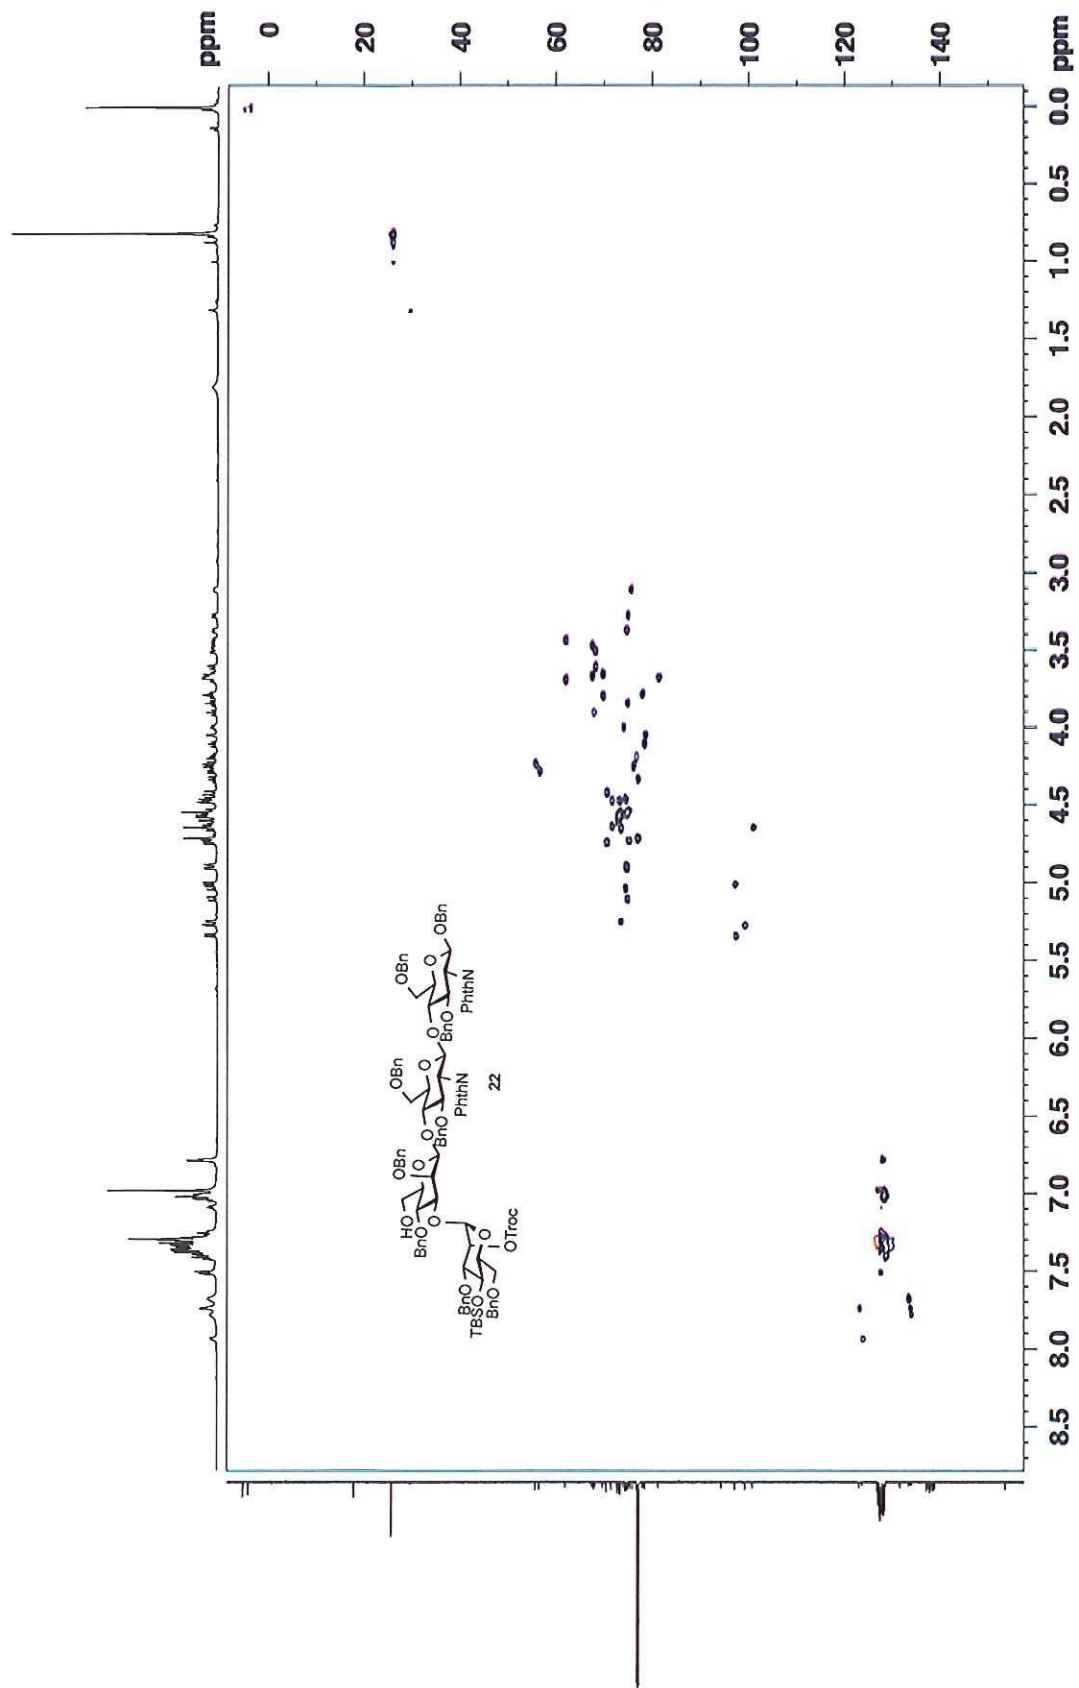

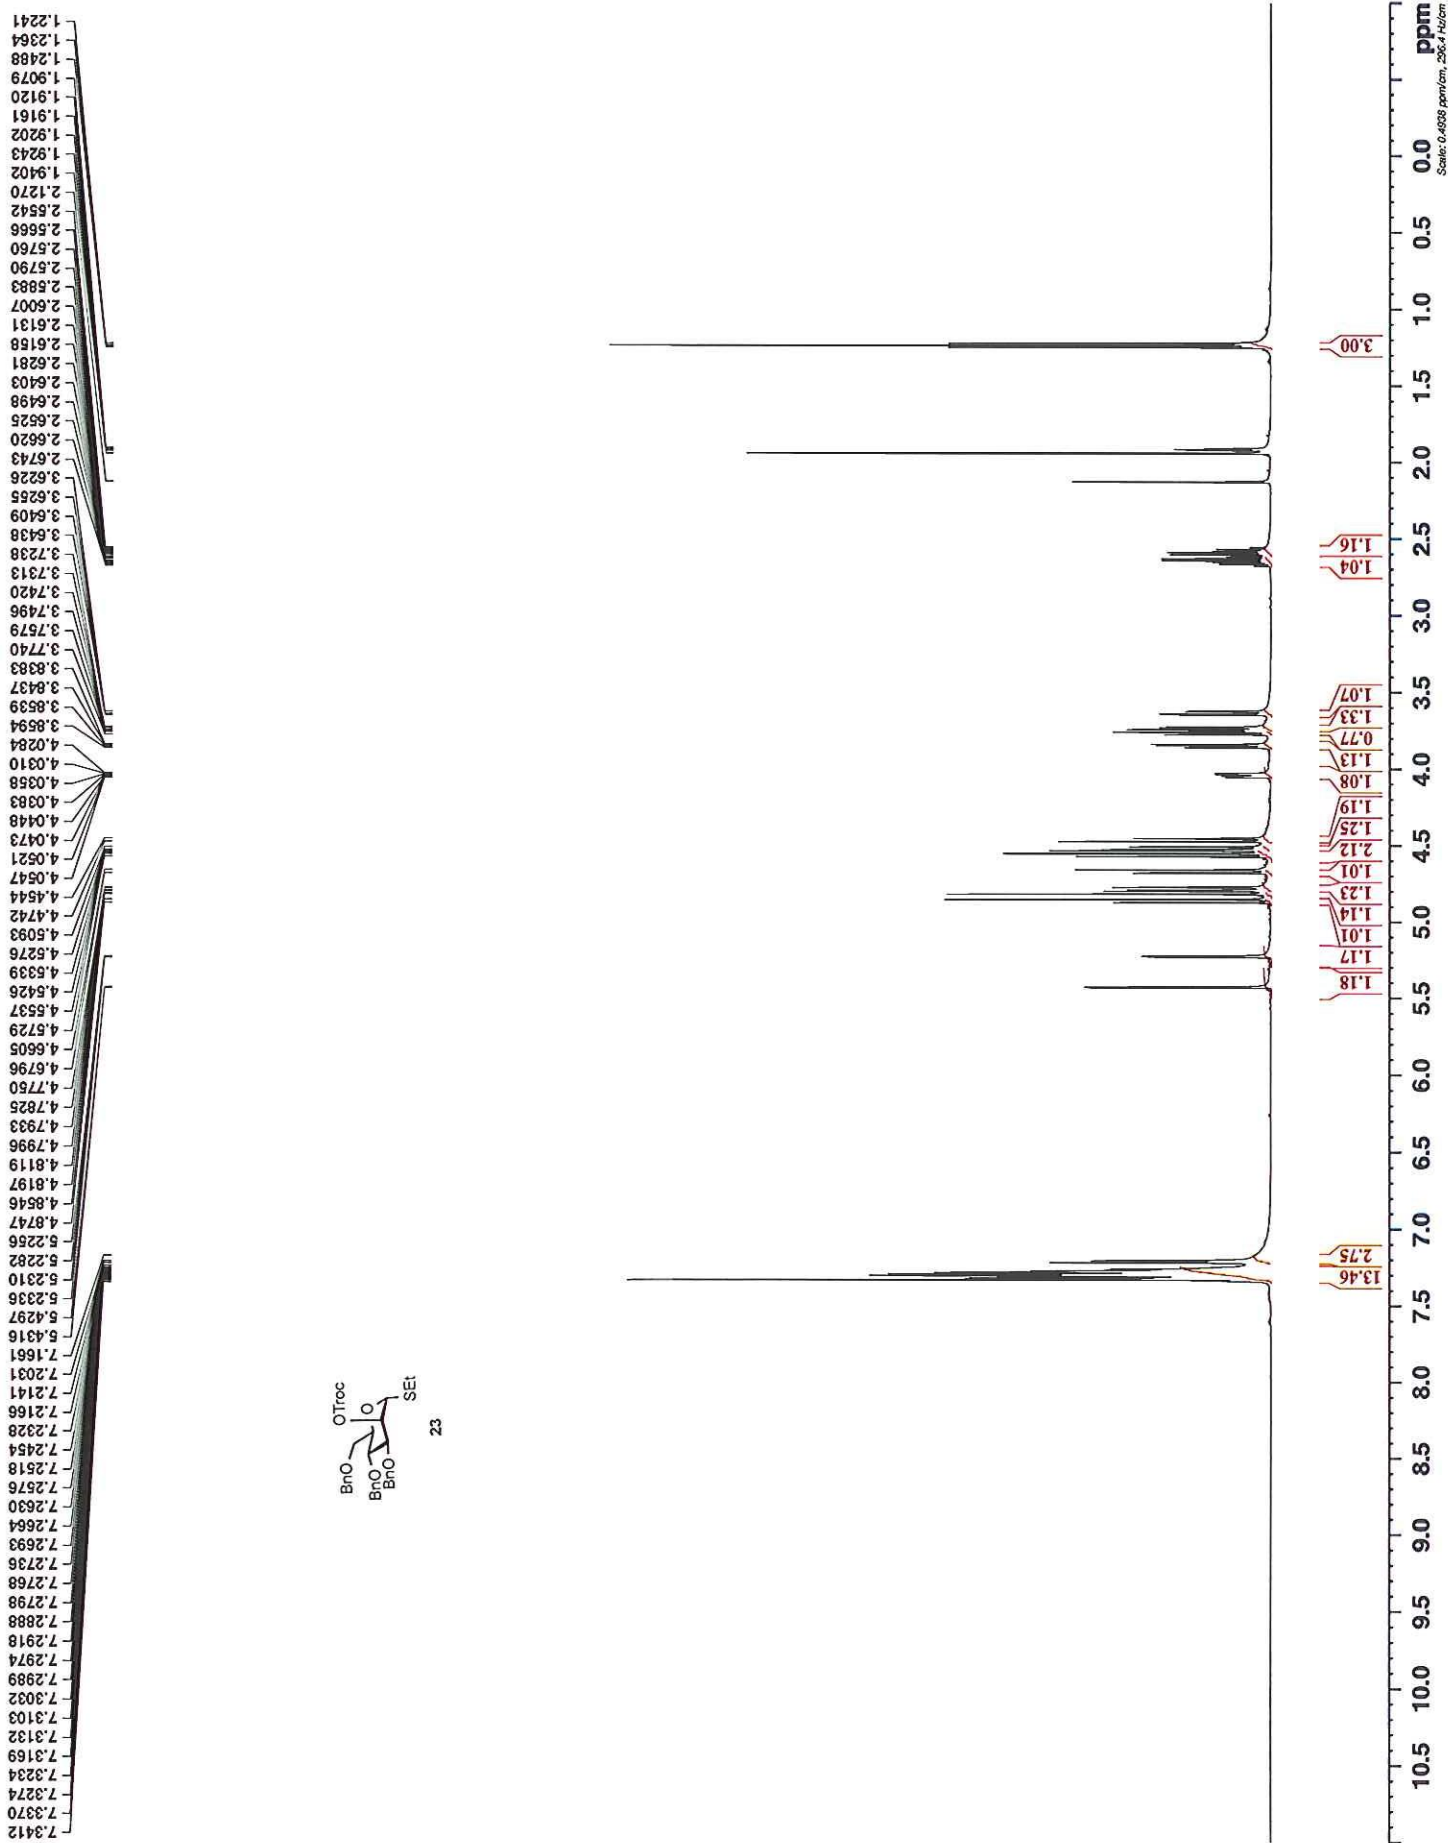

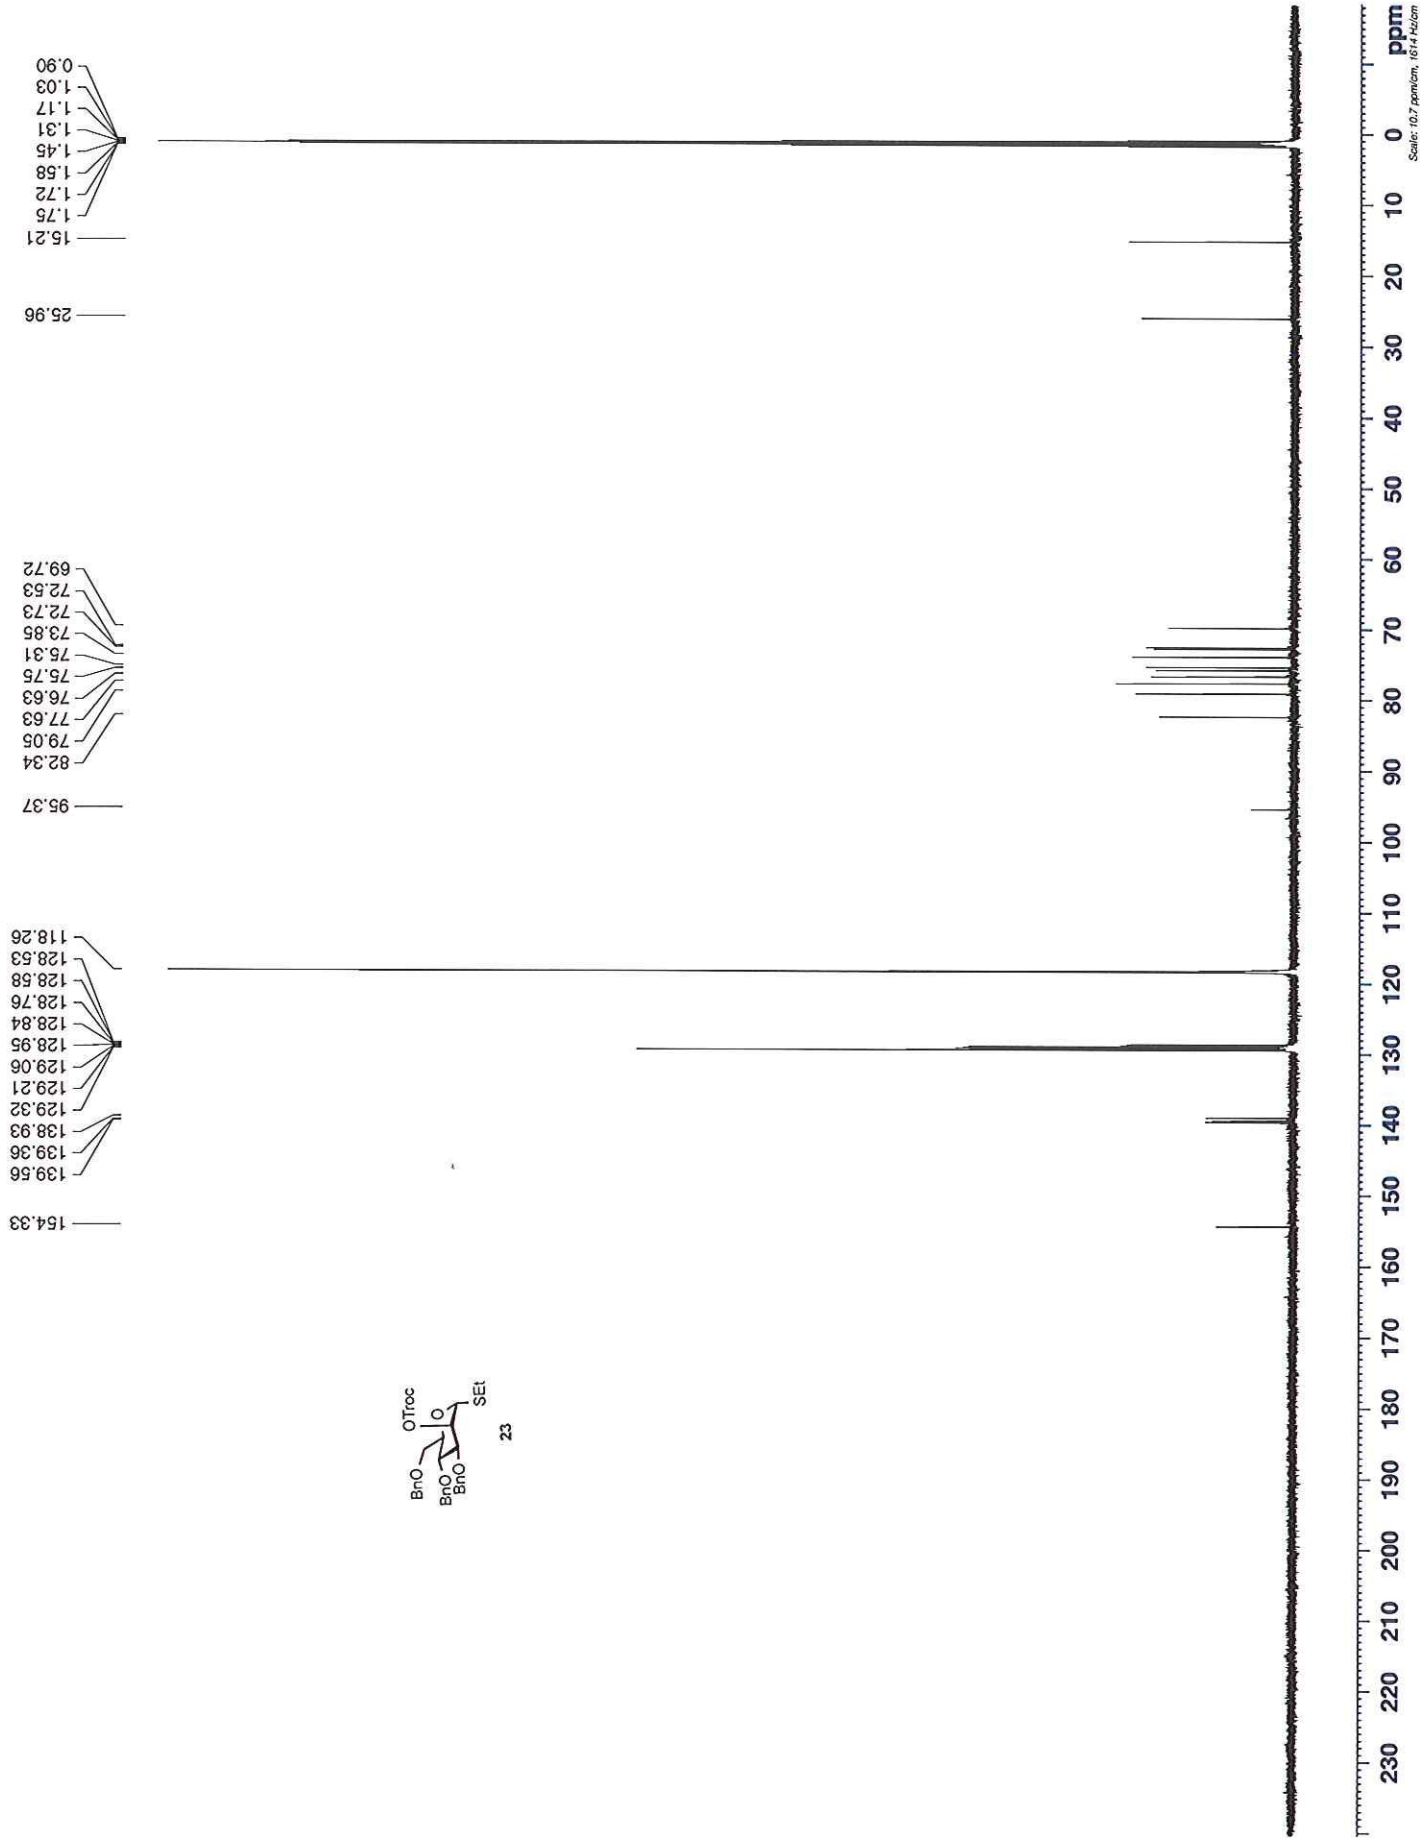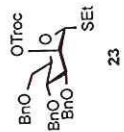



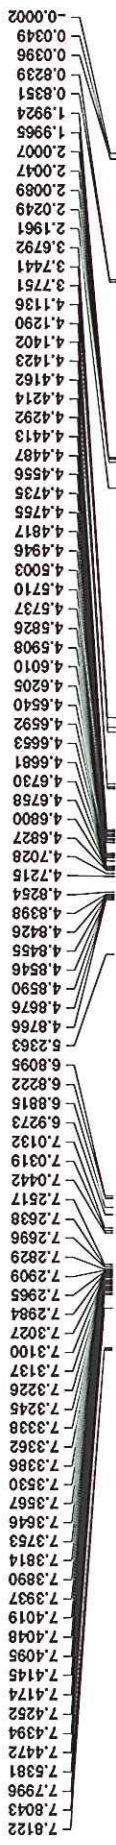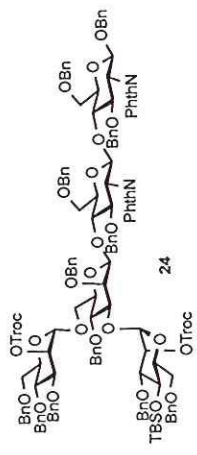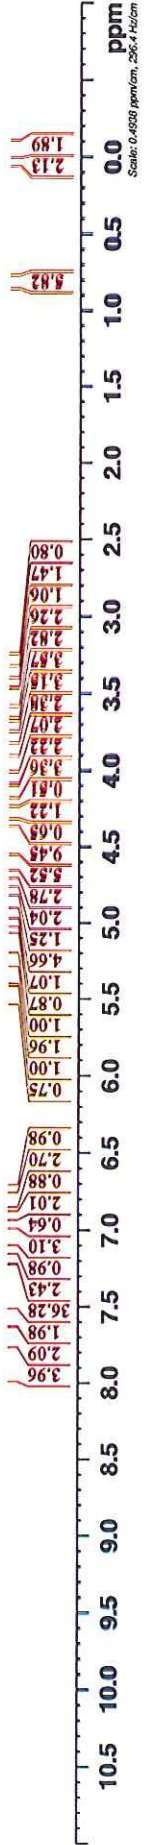



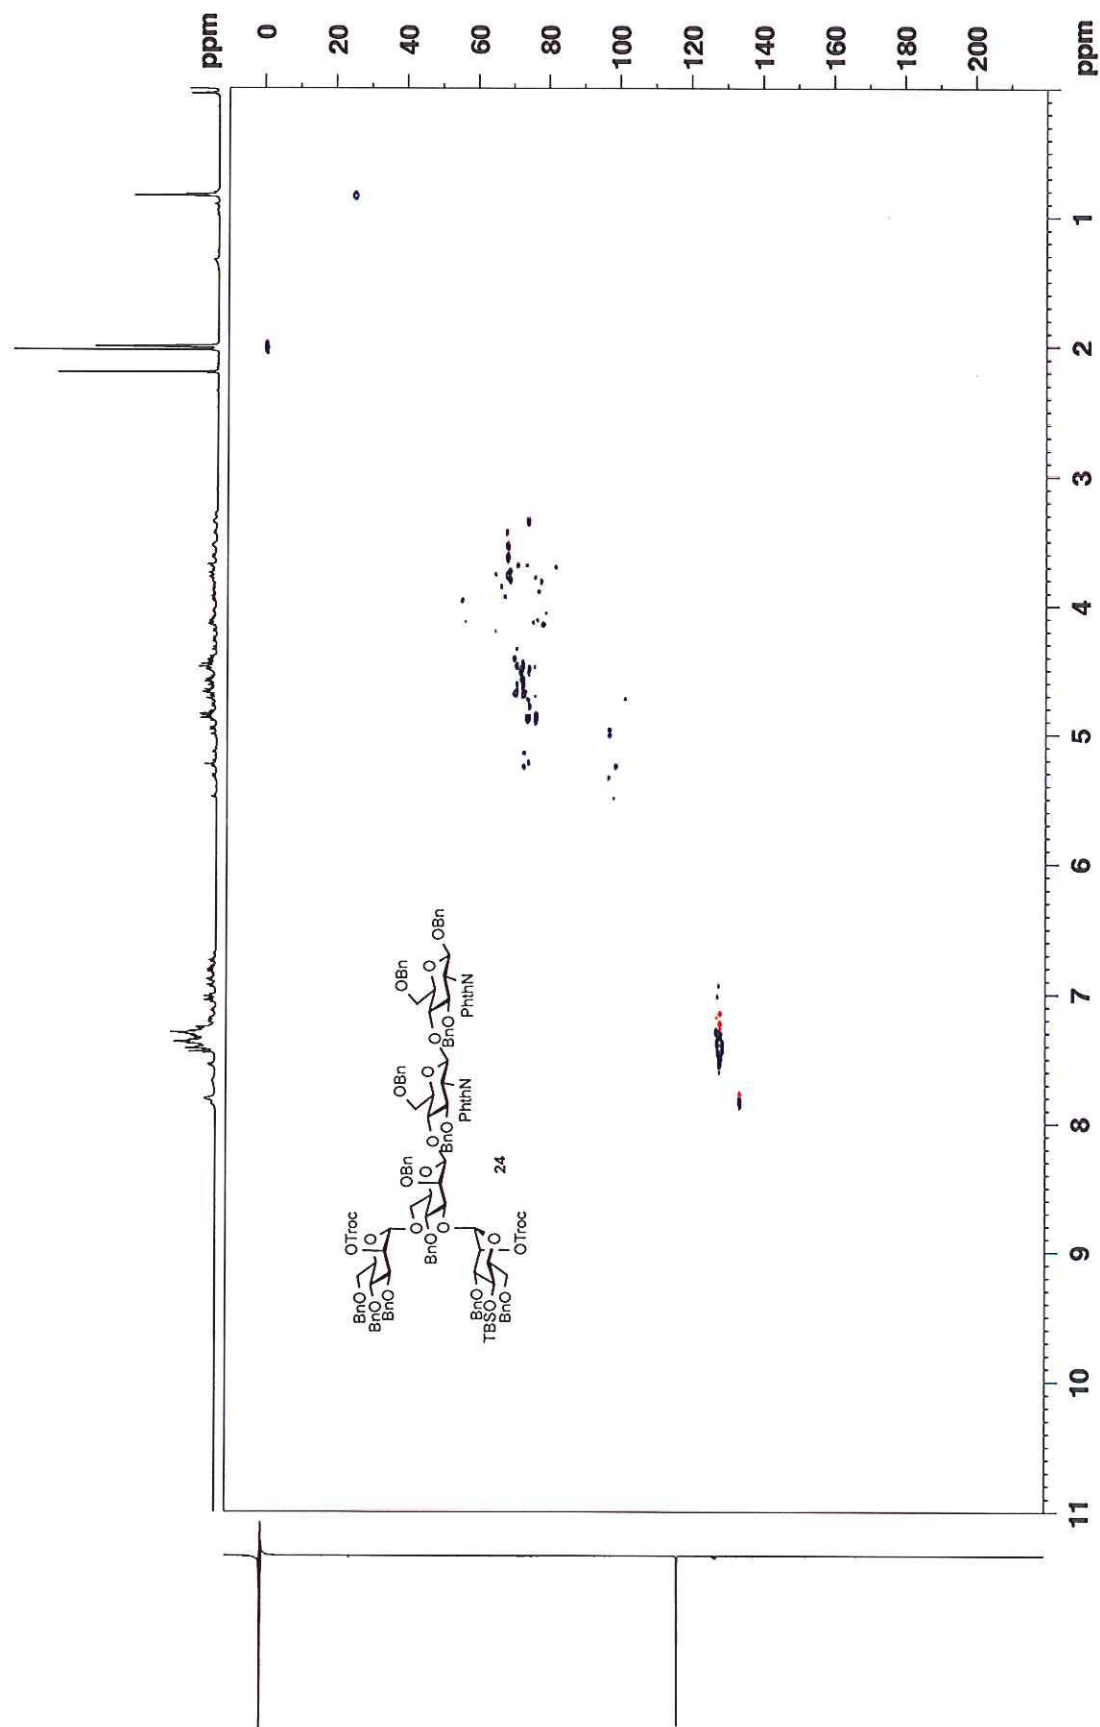

7.5576  
 7.5496  
 7.3893  
 7.3743  
 7.2897  
 7.2801  
 7.2454  
 7.2412  
 7.2140  
 7.2038  
 7.1969  
 7.1856  
 7.1662  
 7.1577  
 7.1453  
 7.1322  
 7.1292  
 7.1142  
 7.1109  
 7.0618  
 7.0555  
 7.0474  
 7.0029  
 6.8963  
 6.8761  
 6.8627  
 6.8454  
 6.8343  
 6.8304  
 6.7979  
 6.7837  
 6.6375  
 6.6243  
 6.5947  
 6.5802  
 5.1477  
 5.1443  
 4.9233  
 4.8379  
 4.7582  
 4.7348  
 4.7158  
 4.6867  
 4.6783  
 4.6668  
 4.6190  
 4.6098  
 4.6029  
 4.5903  
 4.5796  
 4.5715  
 4.5453  
 4.5197  
 4.5054  
 4.4536  
 4.4330  
 4.4230  
 4.4112  
 4.3895  
 4.3854  
 4.3660  
 4.3594  
 4.3474  
 4.3330  
 4.3219  
 4.3126  
 4.2979  
 4.2849  
 4.2600  
 4.1153  
 4.0911  
 4.0735  
 4.0688  
 4.0514  
 4.0192  
 3.8468  
 3.8321  
 3.7759  
 3.7688  
 3.7608  
 3.6630  
 3.6386  
 3.5211  
 3.5088  
 3.4987  
 3.4374  
 1.5200  
 1.1838

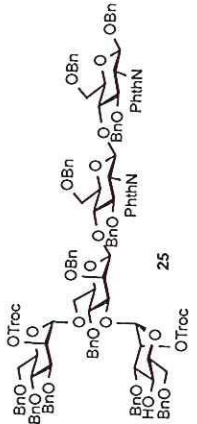

0.62  
 1.12  
 3.52  
 0.69  
 2.27  
 39.39  
 1.69  
 1.04  
 0.87  
 4.92  
 1.58  
 0.72  
 3.98  
 0.43  
 0.80  
 1.73  
 0.65  
 0.83  
 0.66  
 0.90  
 0.68  
 4.53  
 3.98  
 2.81  
 11.40  
 2.63  
 0.54  
 3.98  
 1.96  
 2.44  
 4.26  
 1.96  
 1.54  
 3.08  
 2.29  
 1.65  
 1.25  
 1.00

10.5 10.0 9.5 9.0 8.5 8.0 7.5 7.0 6.5 6.0 5.5 5.0 4.5 4.0 3.5 3.0 2.5 2.0 1.5 1.0 0.5 0.0 ppm

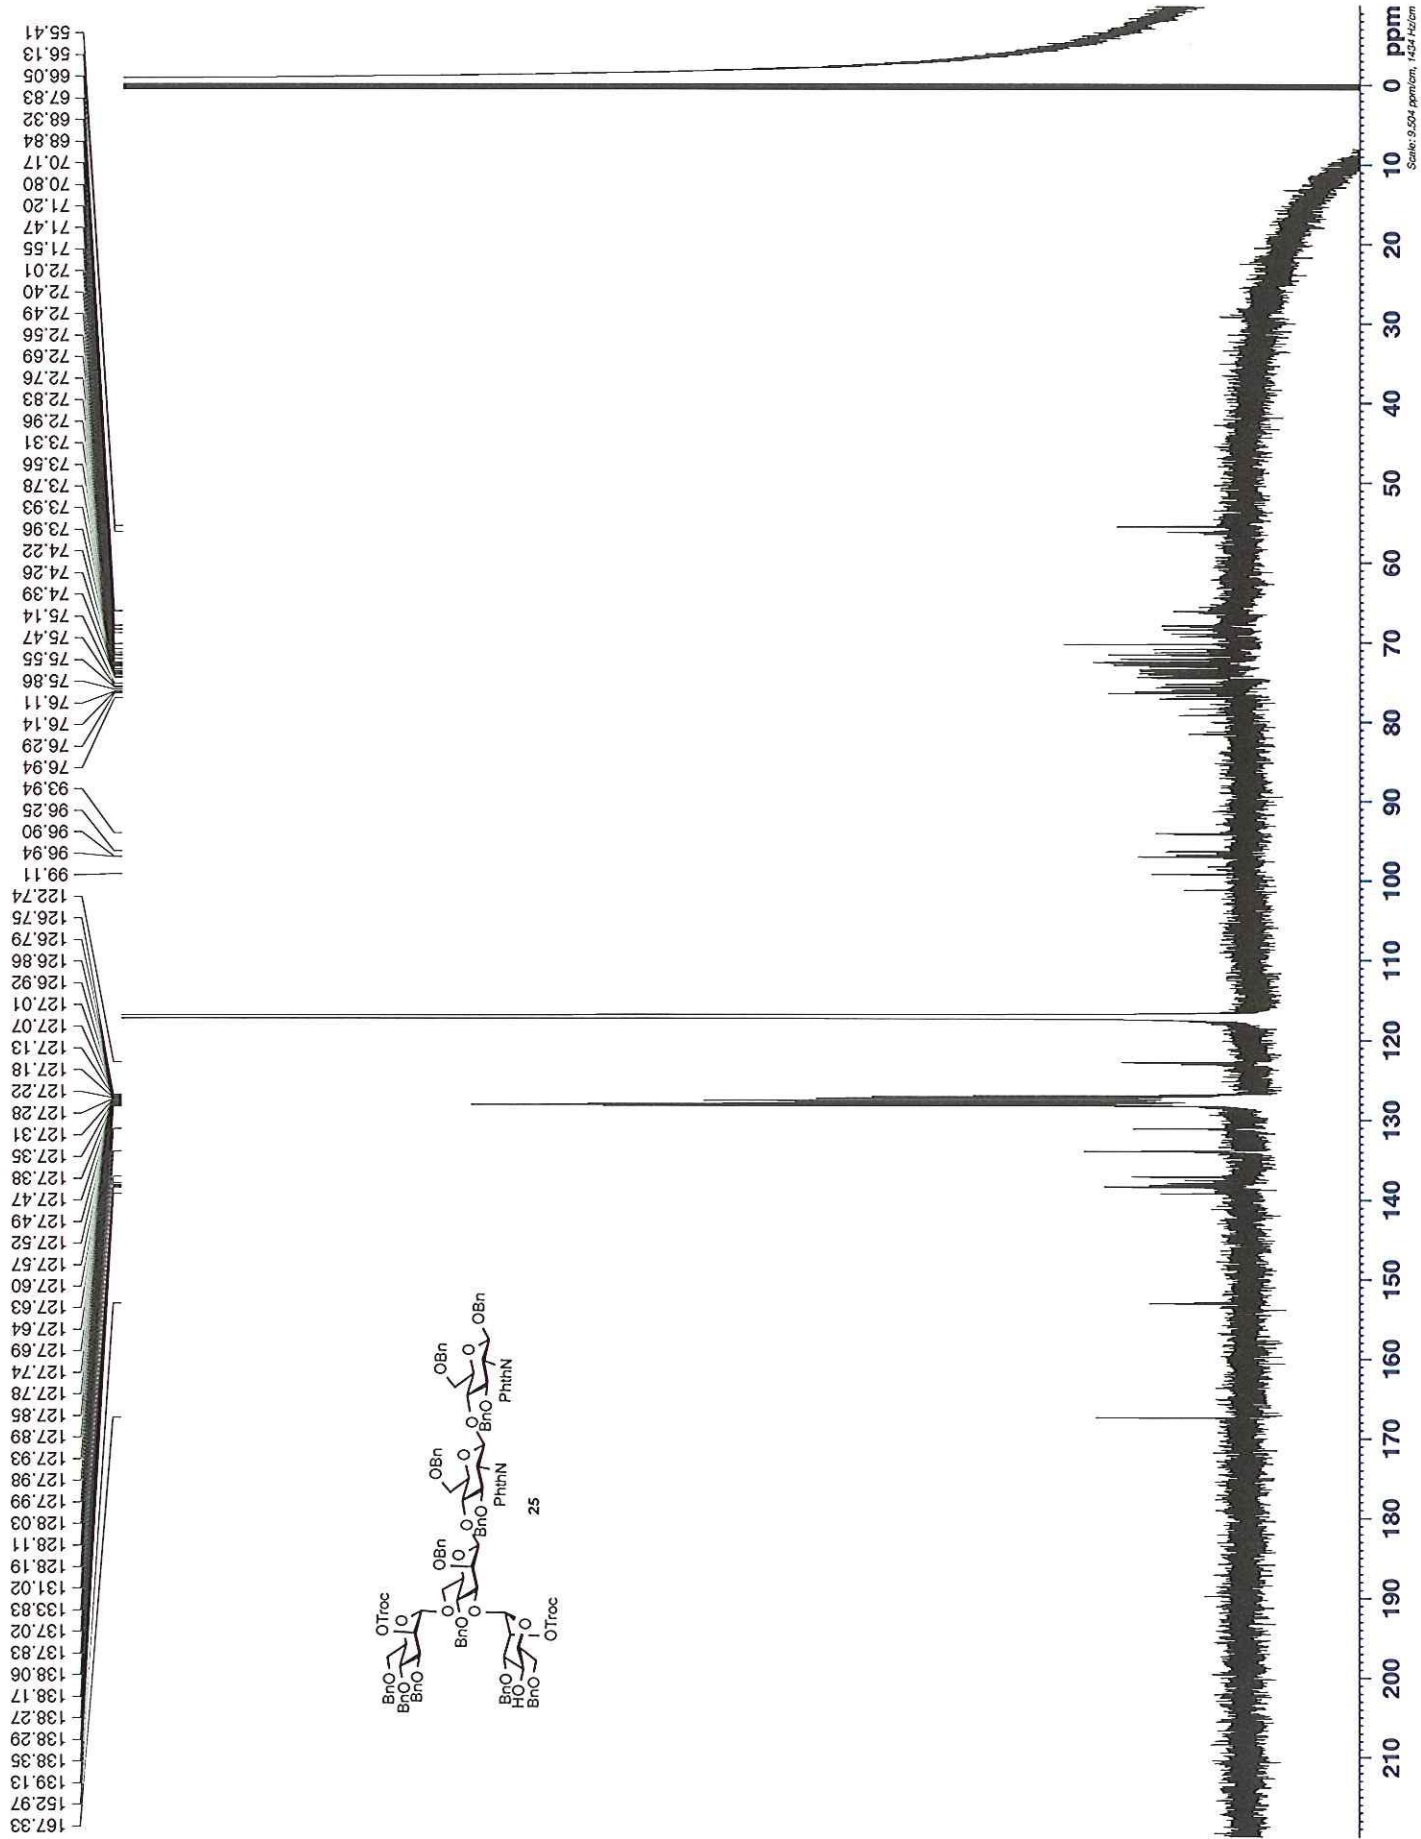

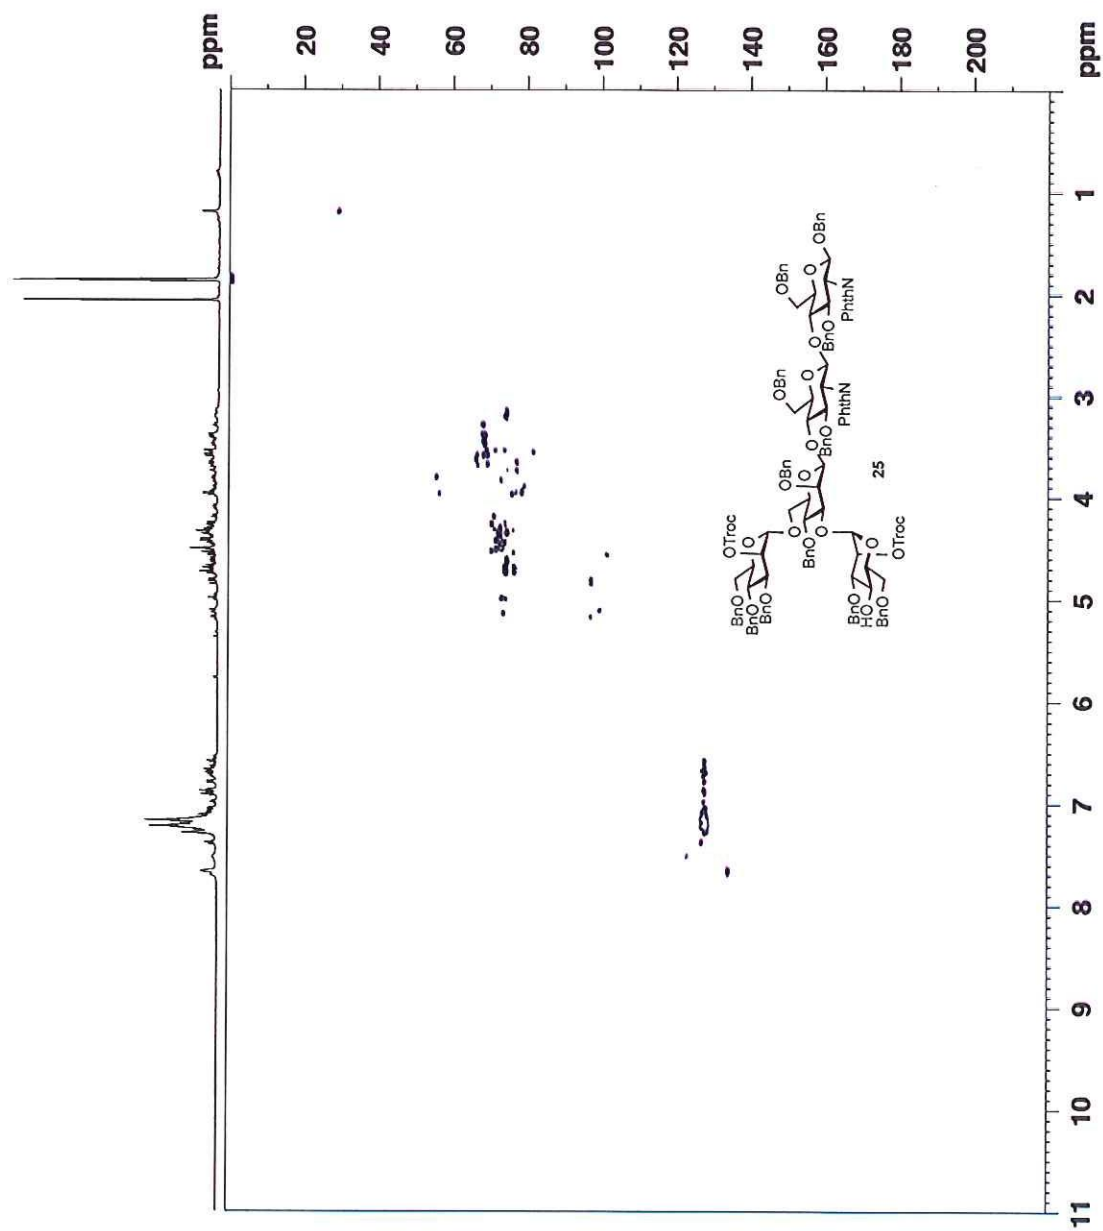

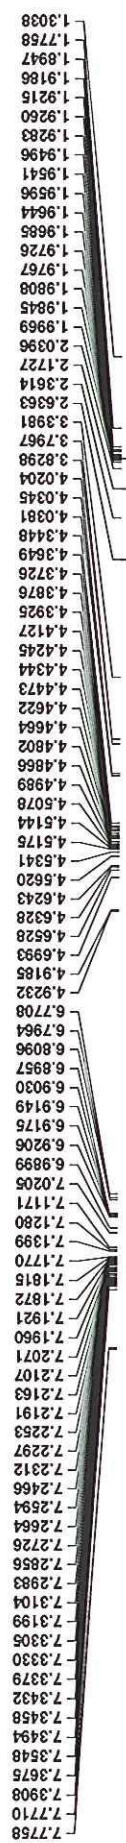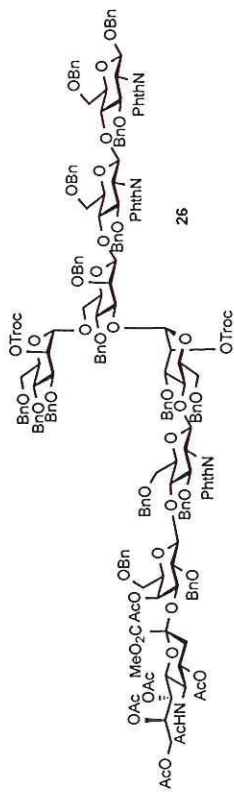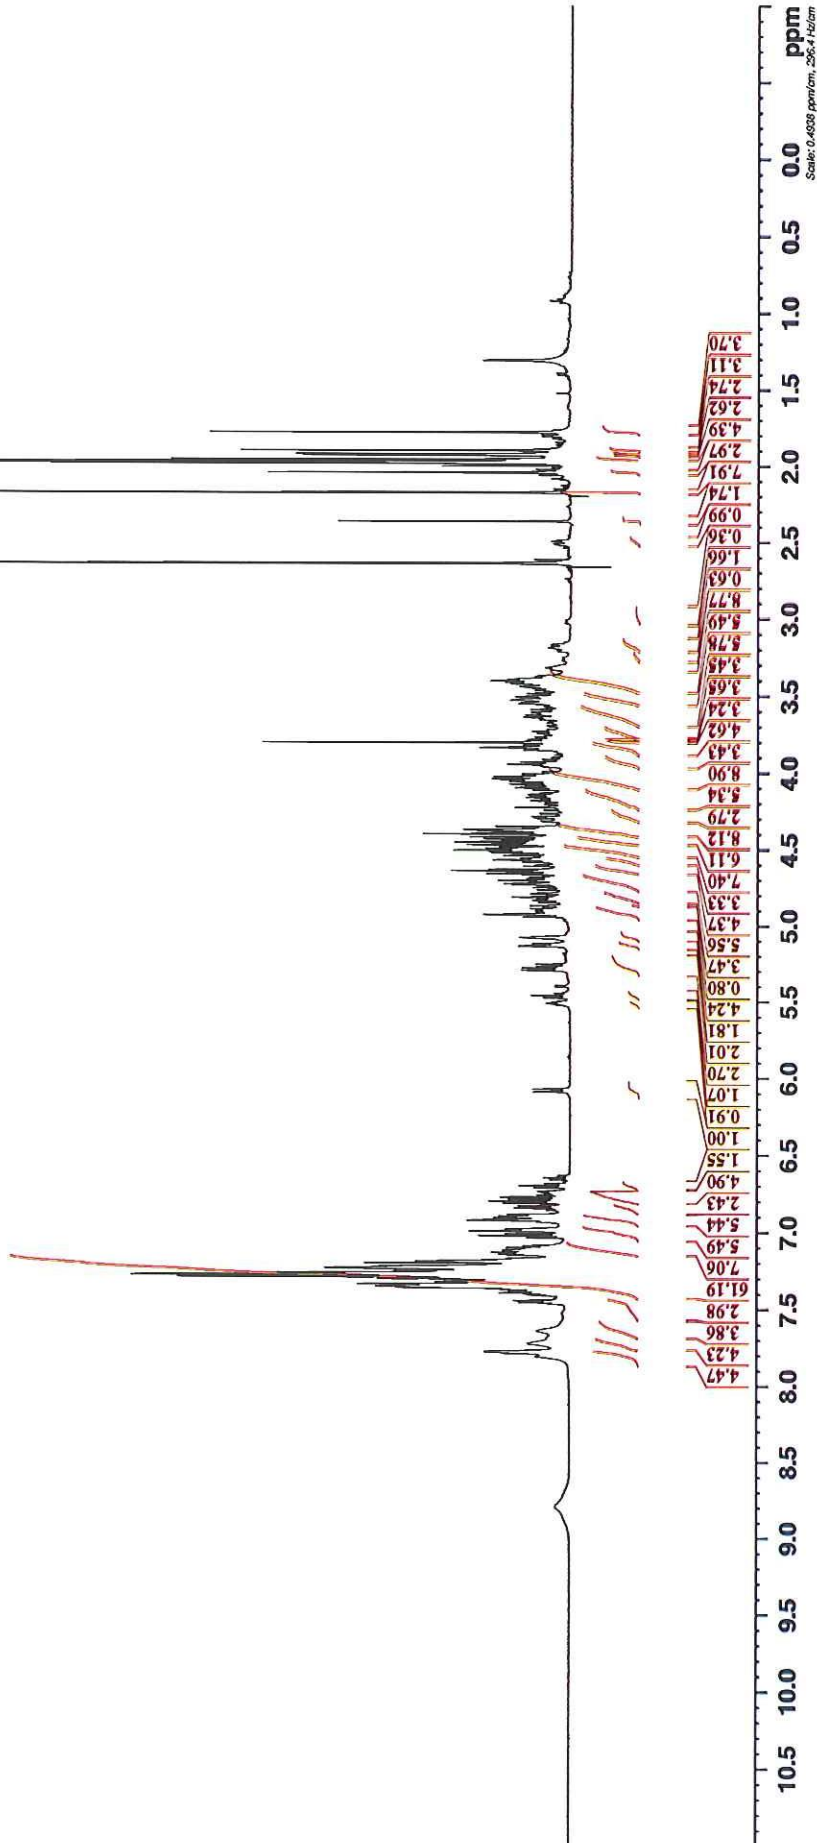

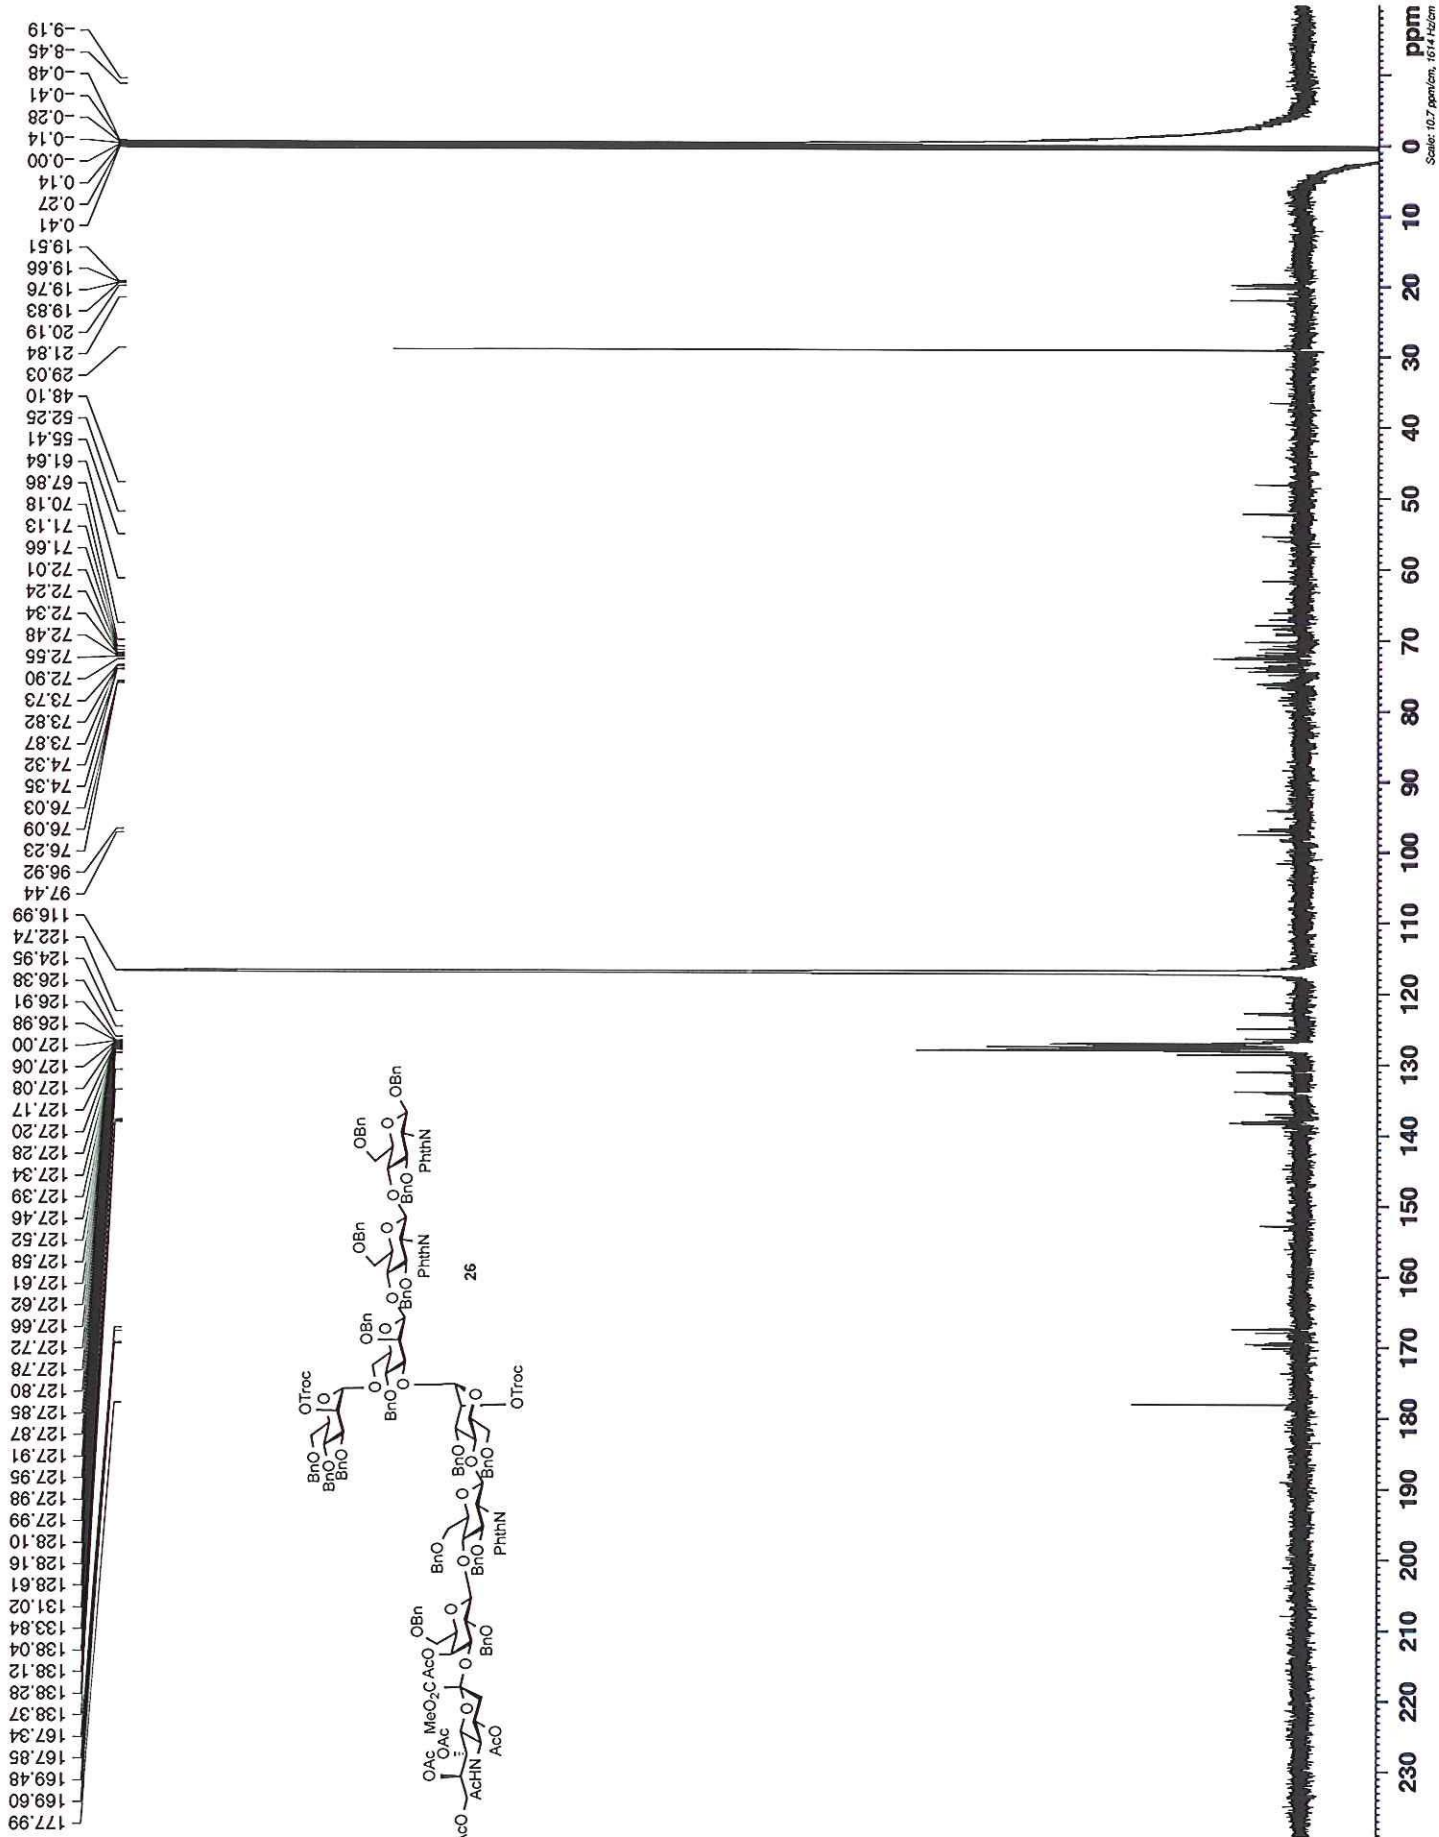



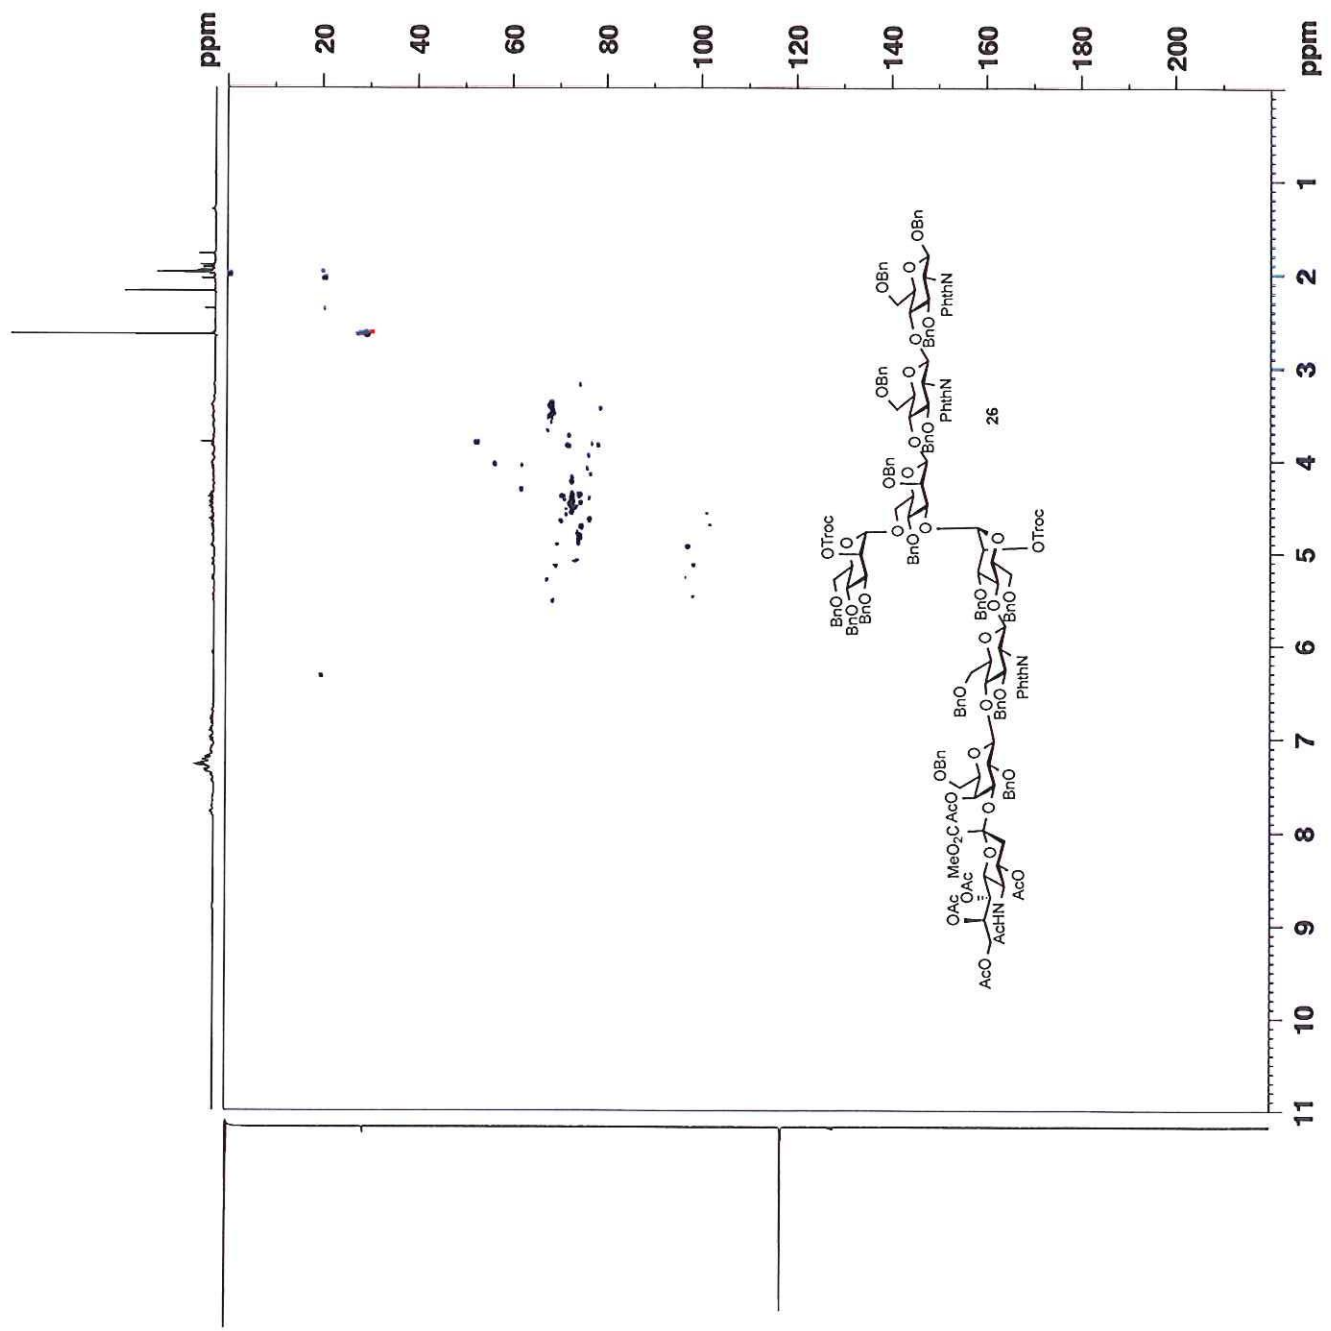

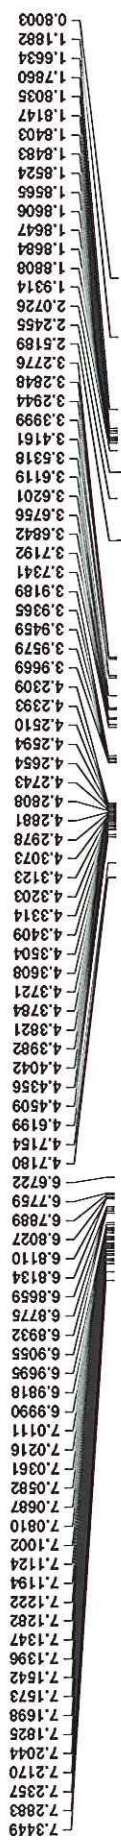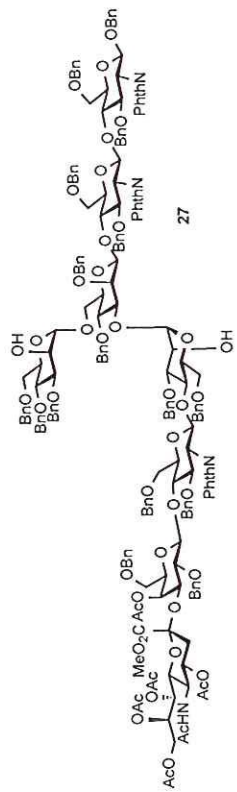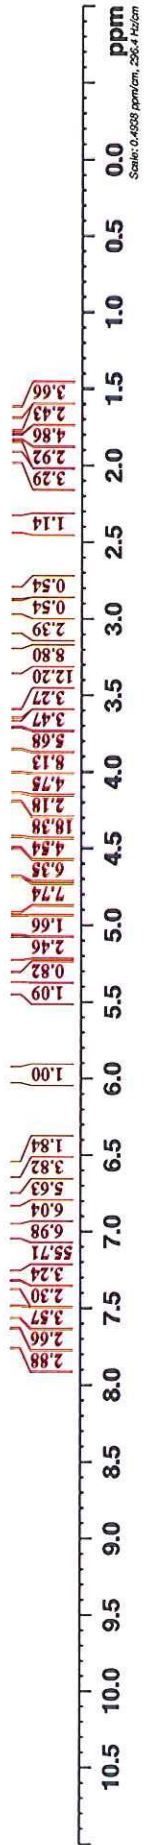

7.6362  
7.6309  
7.6214  
7.5864  
7.5736  
7.5539  
7.4536  
7.4407  
7.4211  
7.4086  
7.3974  
7.3876  
7.3723  
7.3637  
7.3436  
7.3273  
7.3135  
7.3020  
7.2904  
7.2680  
7.2528  
7.2403  
7.2281  
7.2157  
7.2028  
7.1863  
7.1109  
7.1012  
7.0908  
6.9934  
6.9812  
6.8814  
6.8707  
6.8552  
6.8499  
6.8353  
6.8228  
6.8084  
6.7959  
6.7734  
6.7648  
6.7532  
4.9353  
4.9167  
4.7316  
4.7154  
4.6899  
4.6712  
4.6614  
4.6397  
4.6288  
4.6187  
4.5884  
4.5621  
4.5561  
4.3419  
4.3348  
4.2745  
4.2632  
4.2519  
3.7912  
3.7734  
2.1066  
2.0840  
1.9588  
1.9503  
1.8973  
1.8862  
1.8086  
1.7985  
1.7877  
1.6848  
1.6789  
1.6632  
1.6538  
1.6297  
1.6208  
1.5847  
1.5754  
1.3554  
1.3346  
1.3120  
1.2944  
1.2367  
1.2235  
1.2115  
1.1966  
1.1831  
0.9165  
0.9056  
0.8949  
0.8640  
0.8514  
0.8444  
0.8203

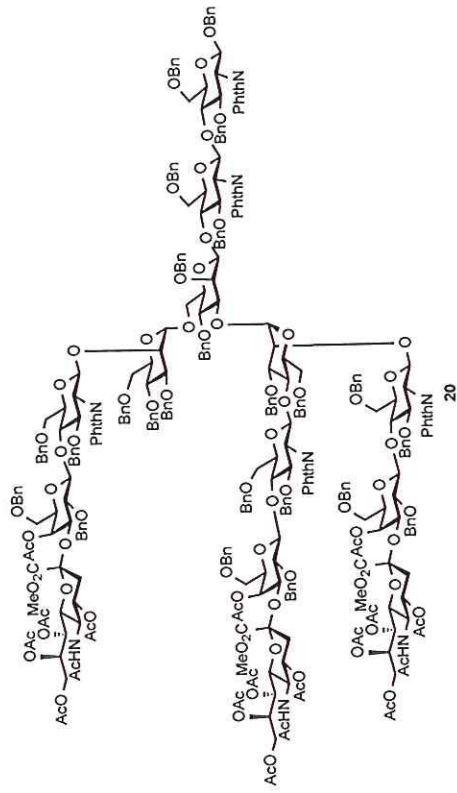

S75

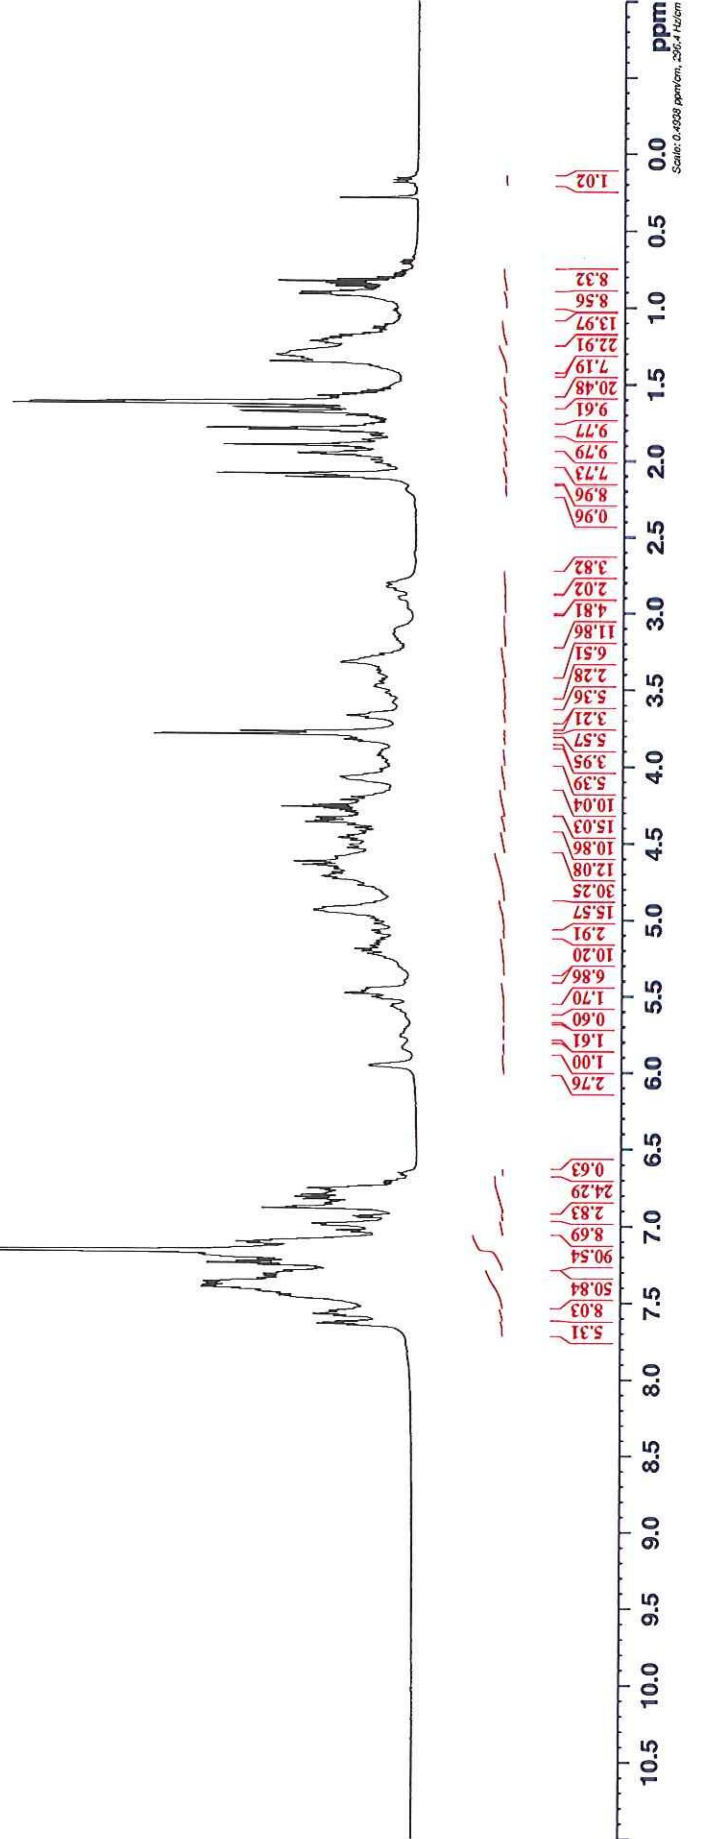

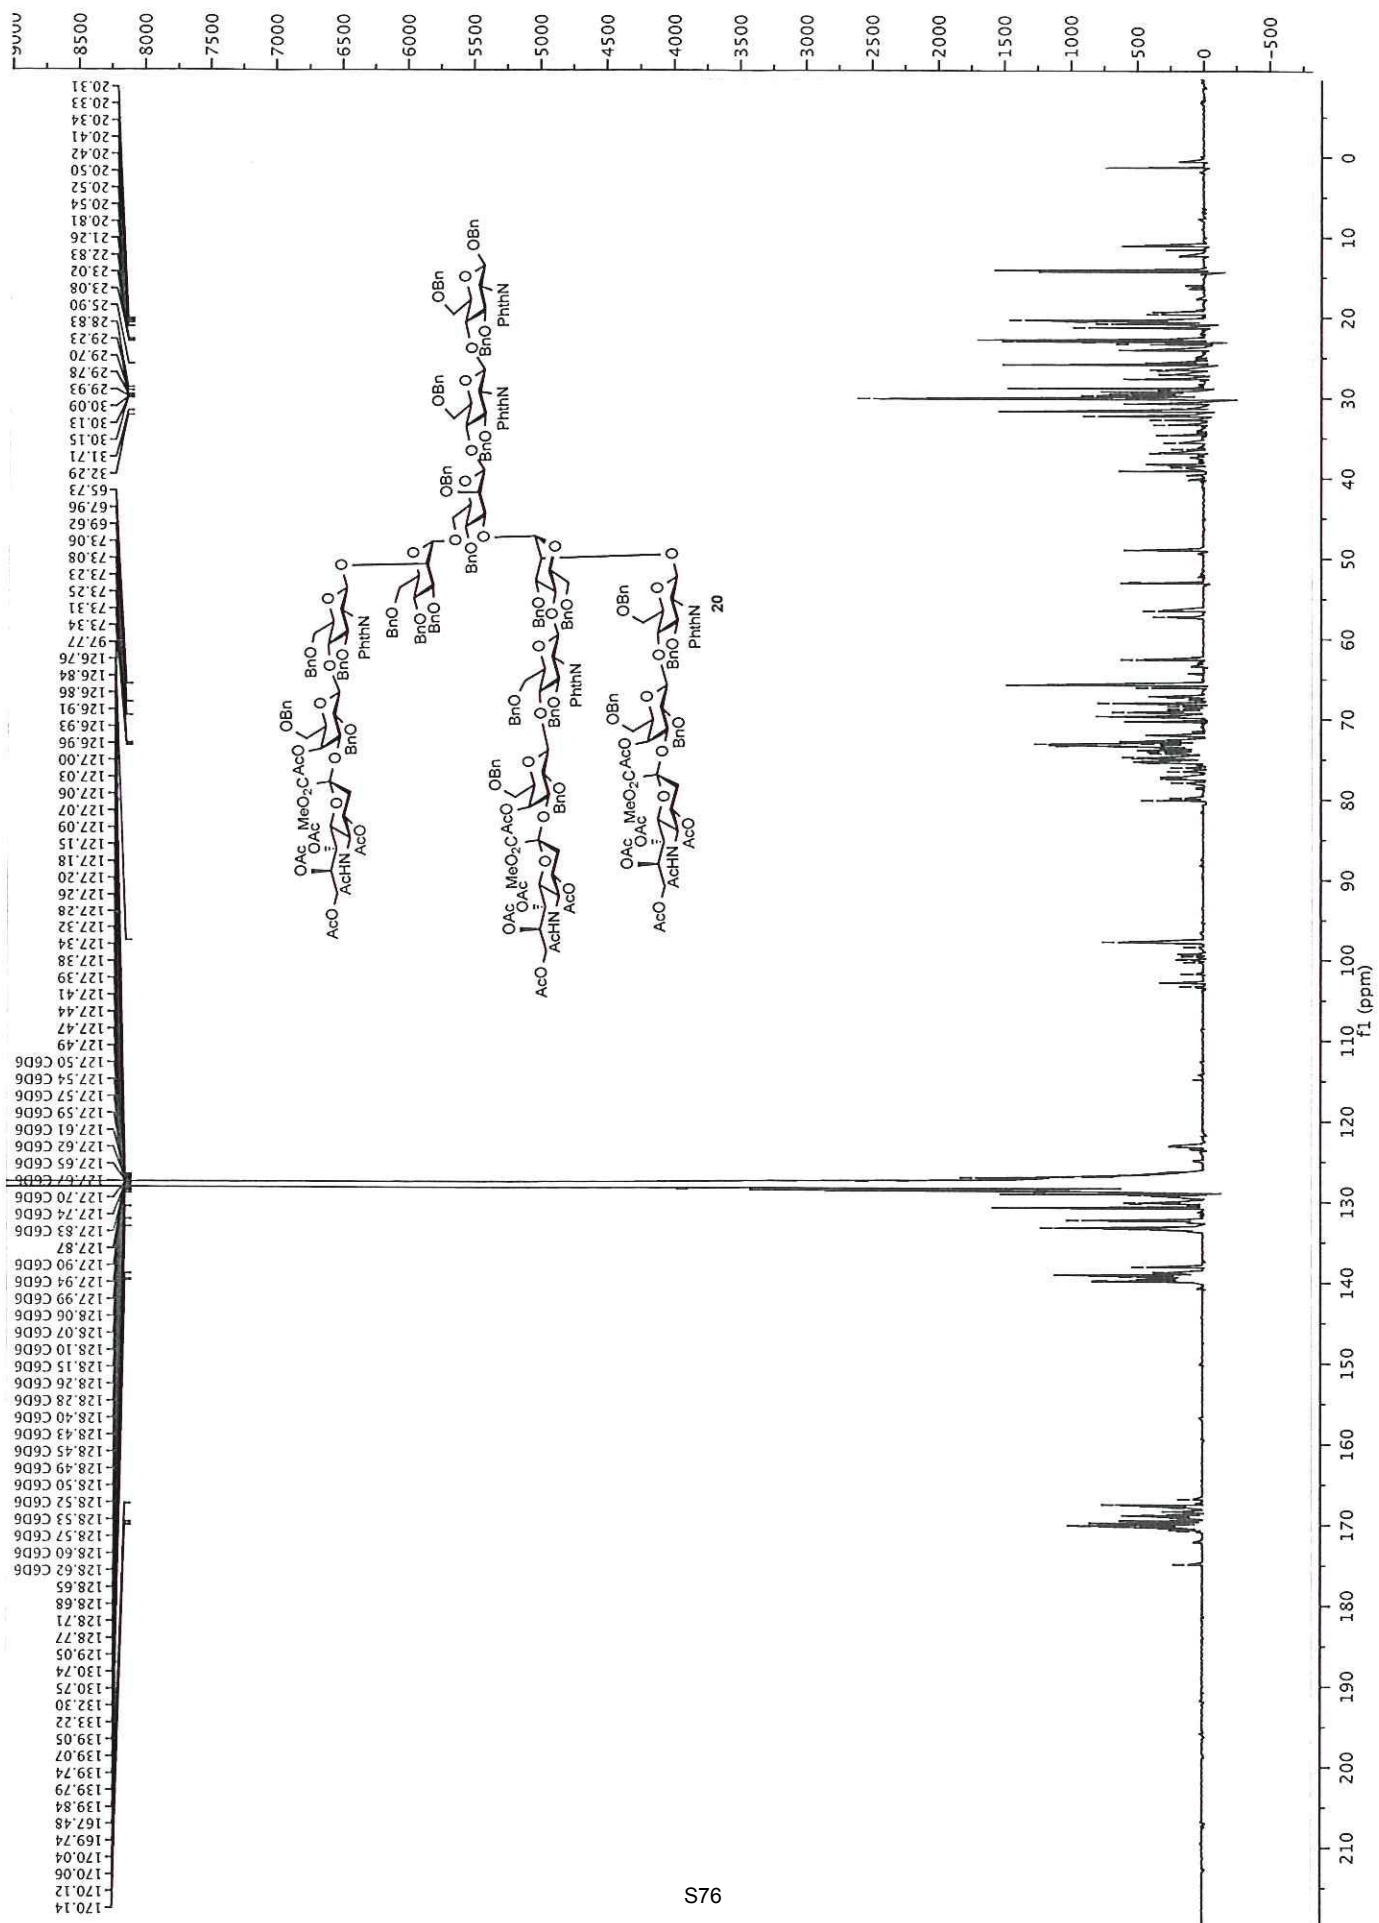

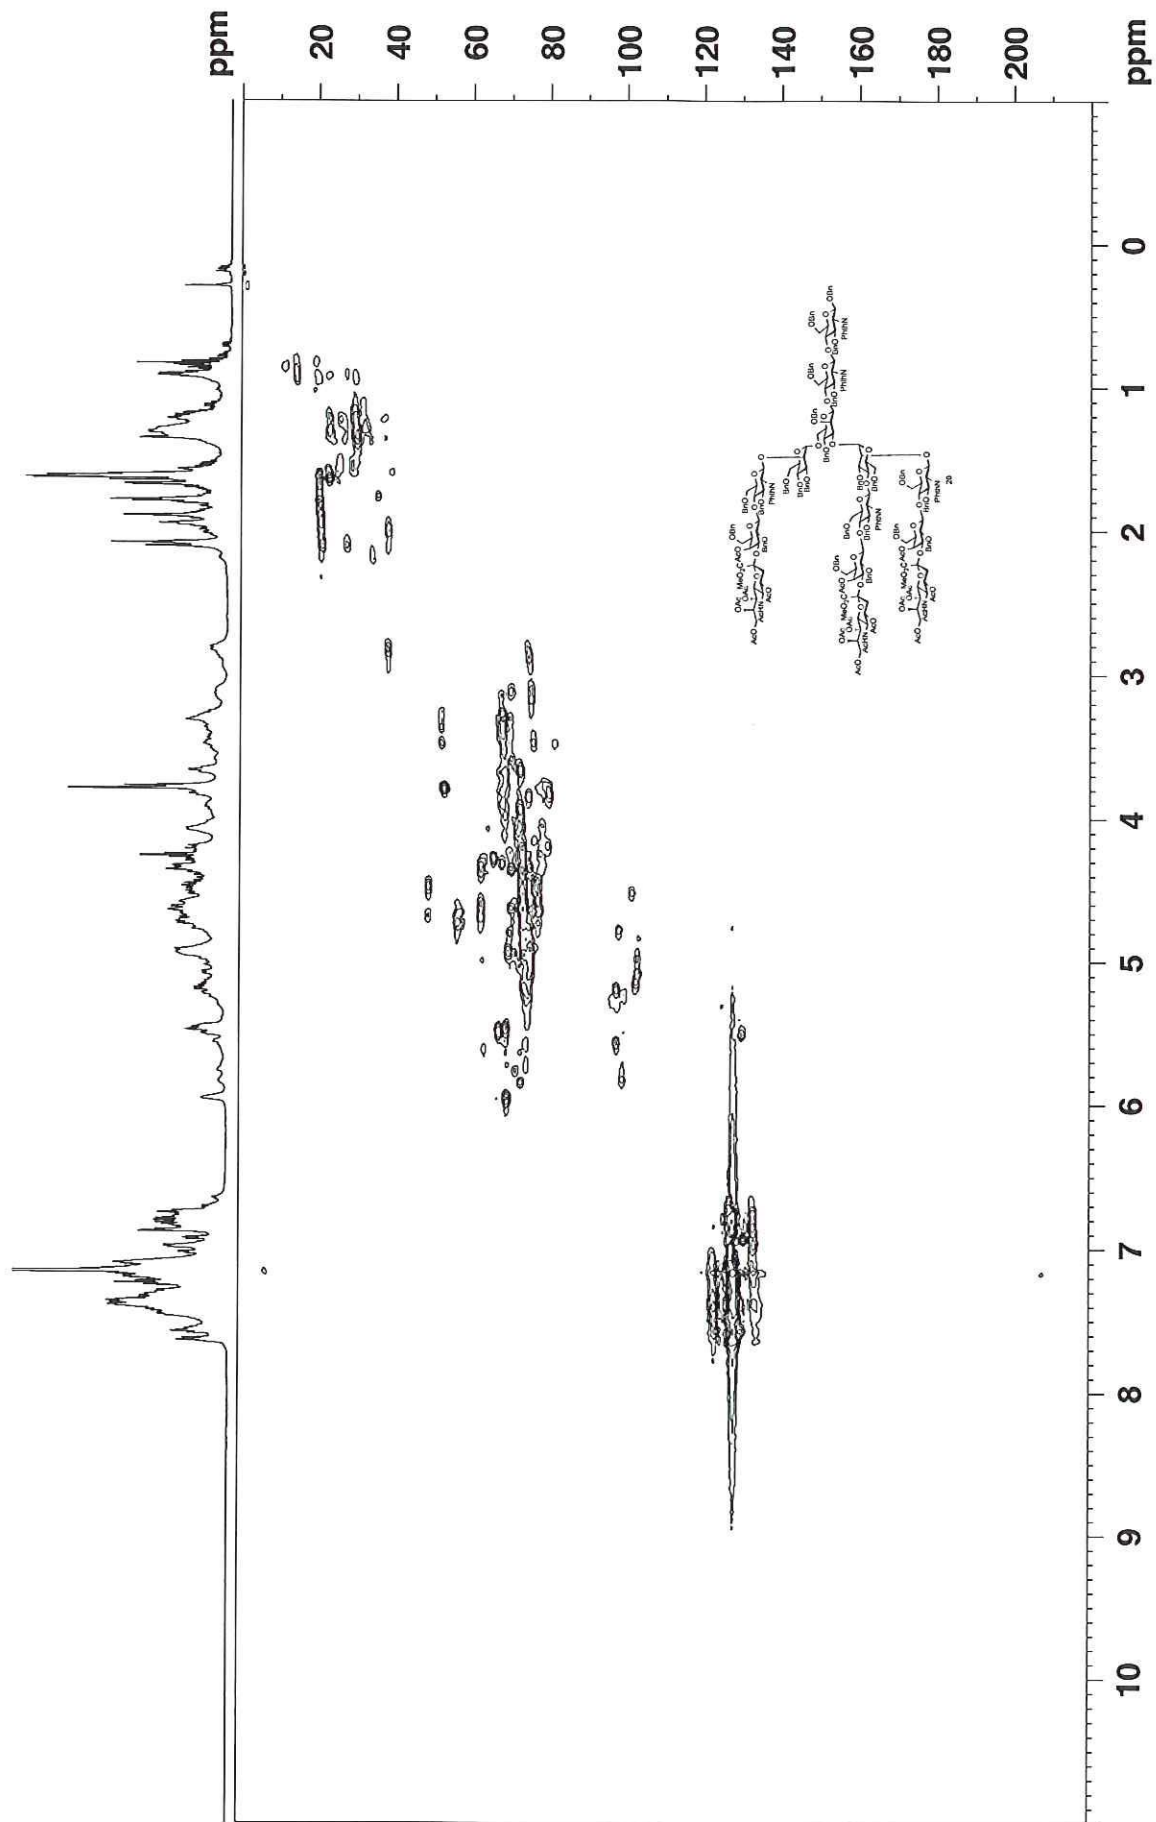









MAW-IV-131-FR18 28 (0.471) Cm (3:32)  
2075.35

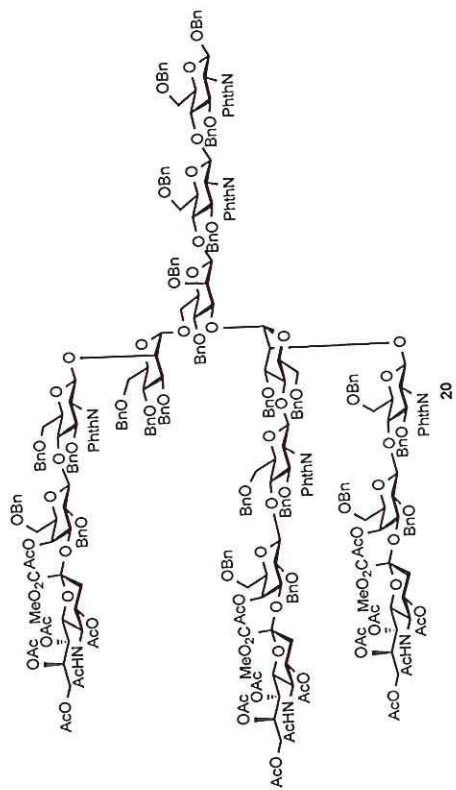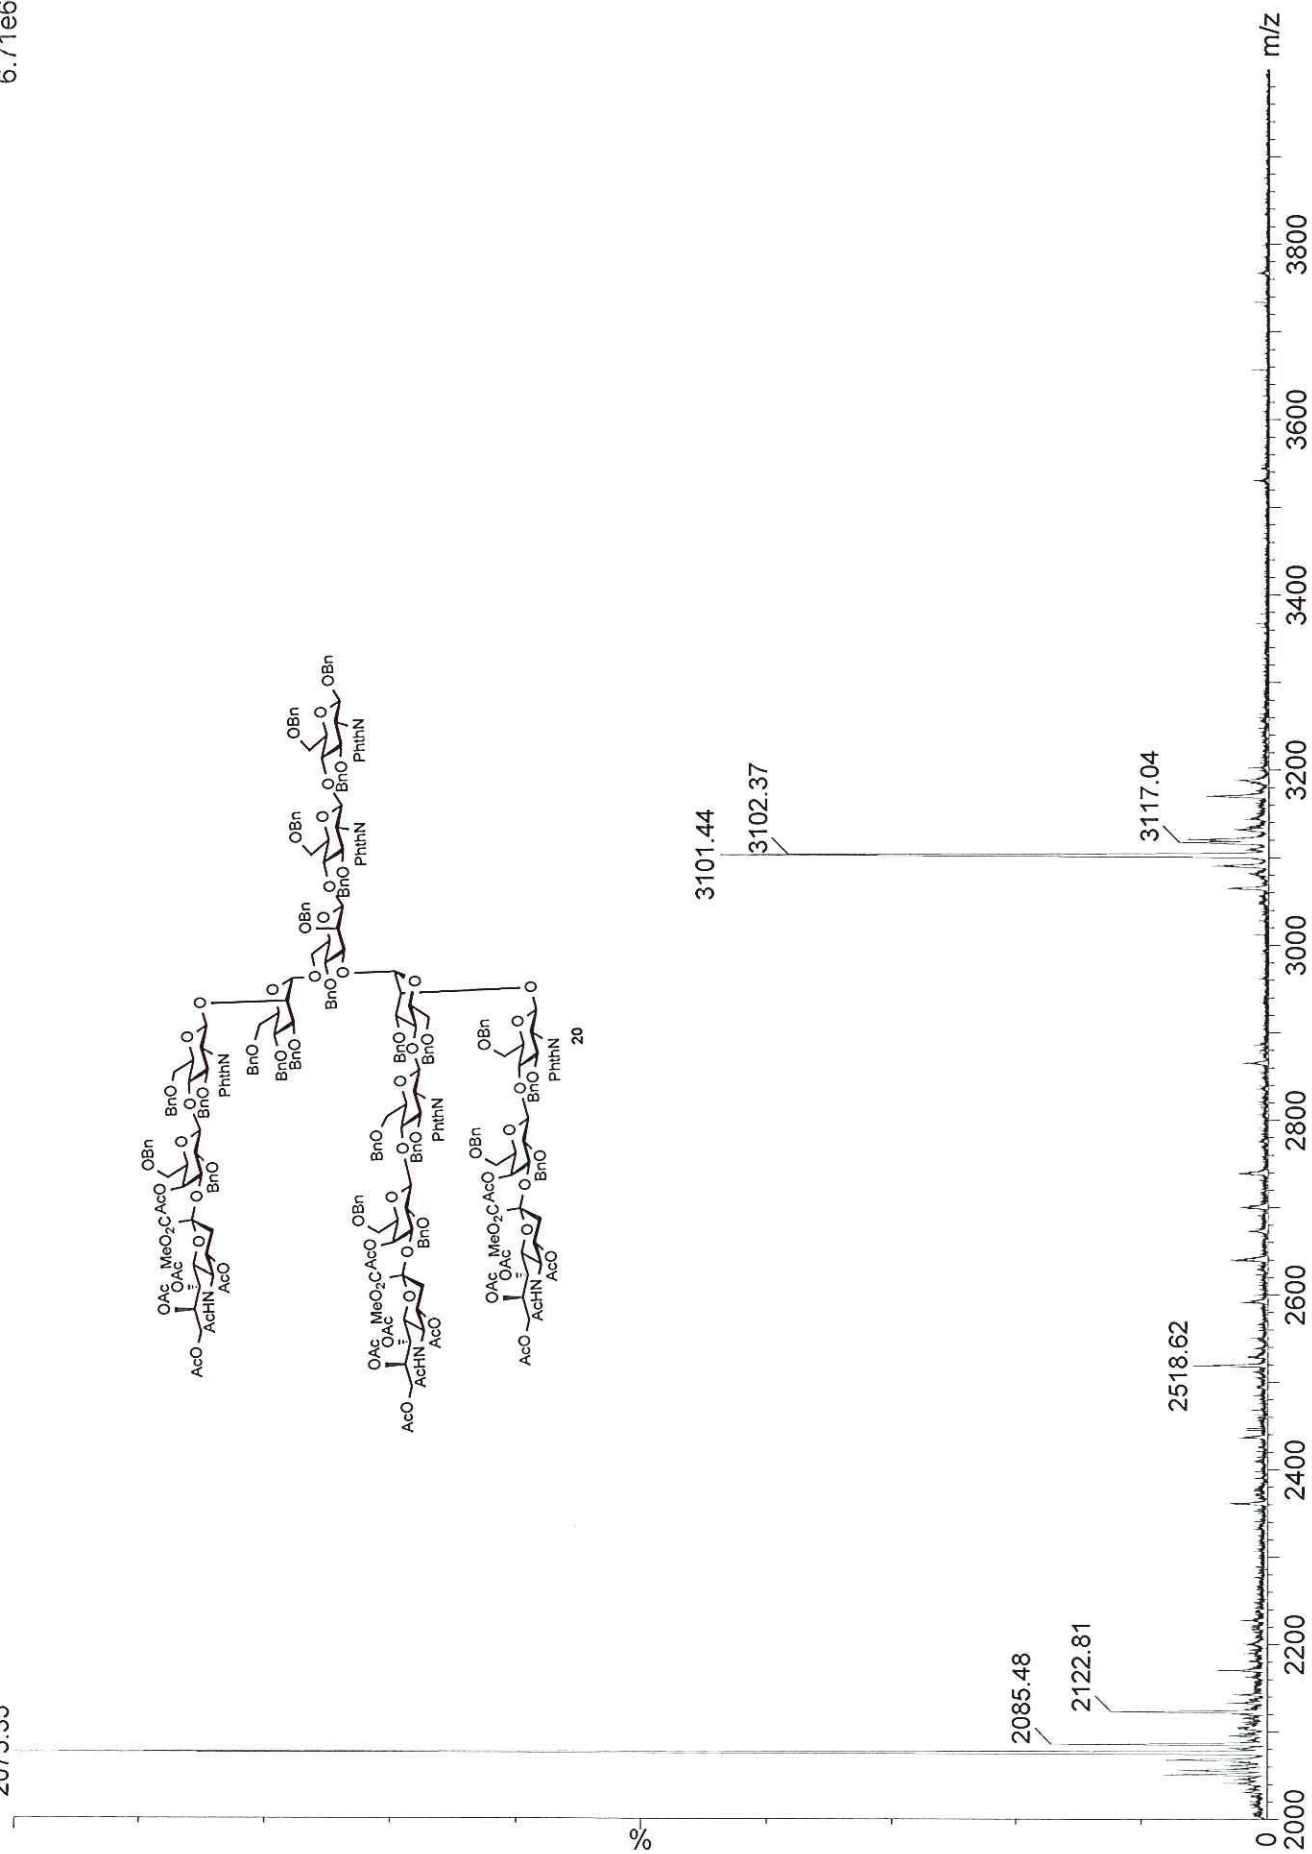

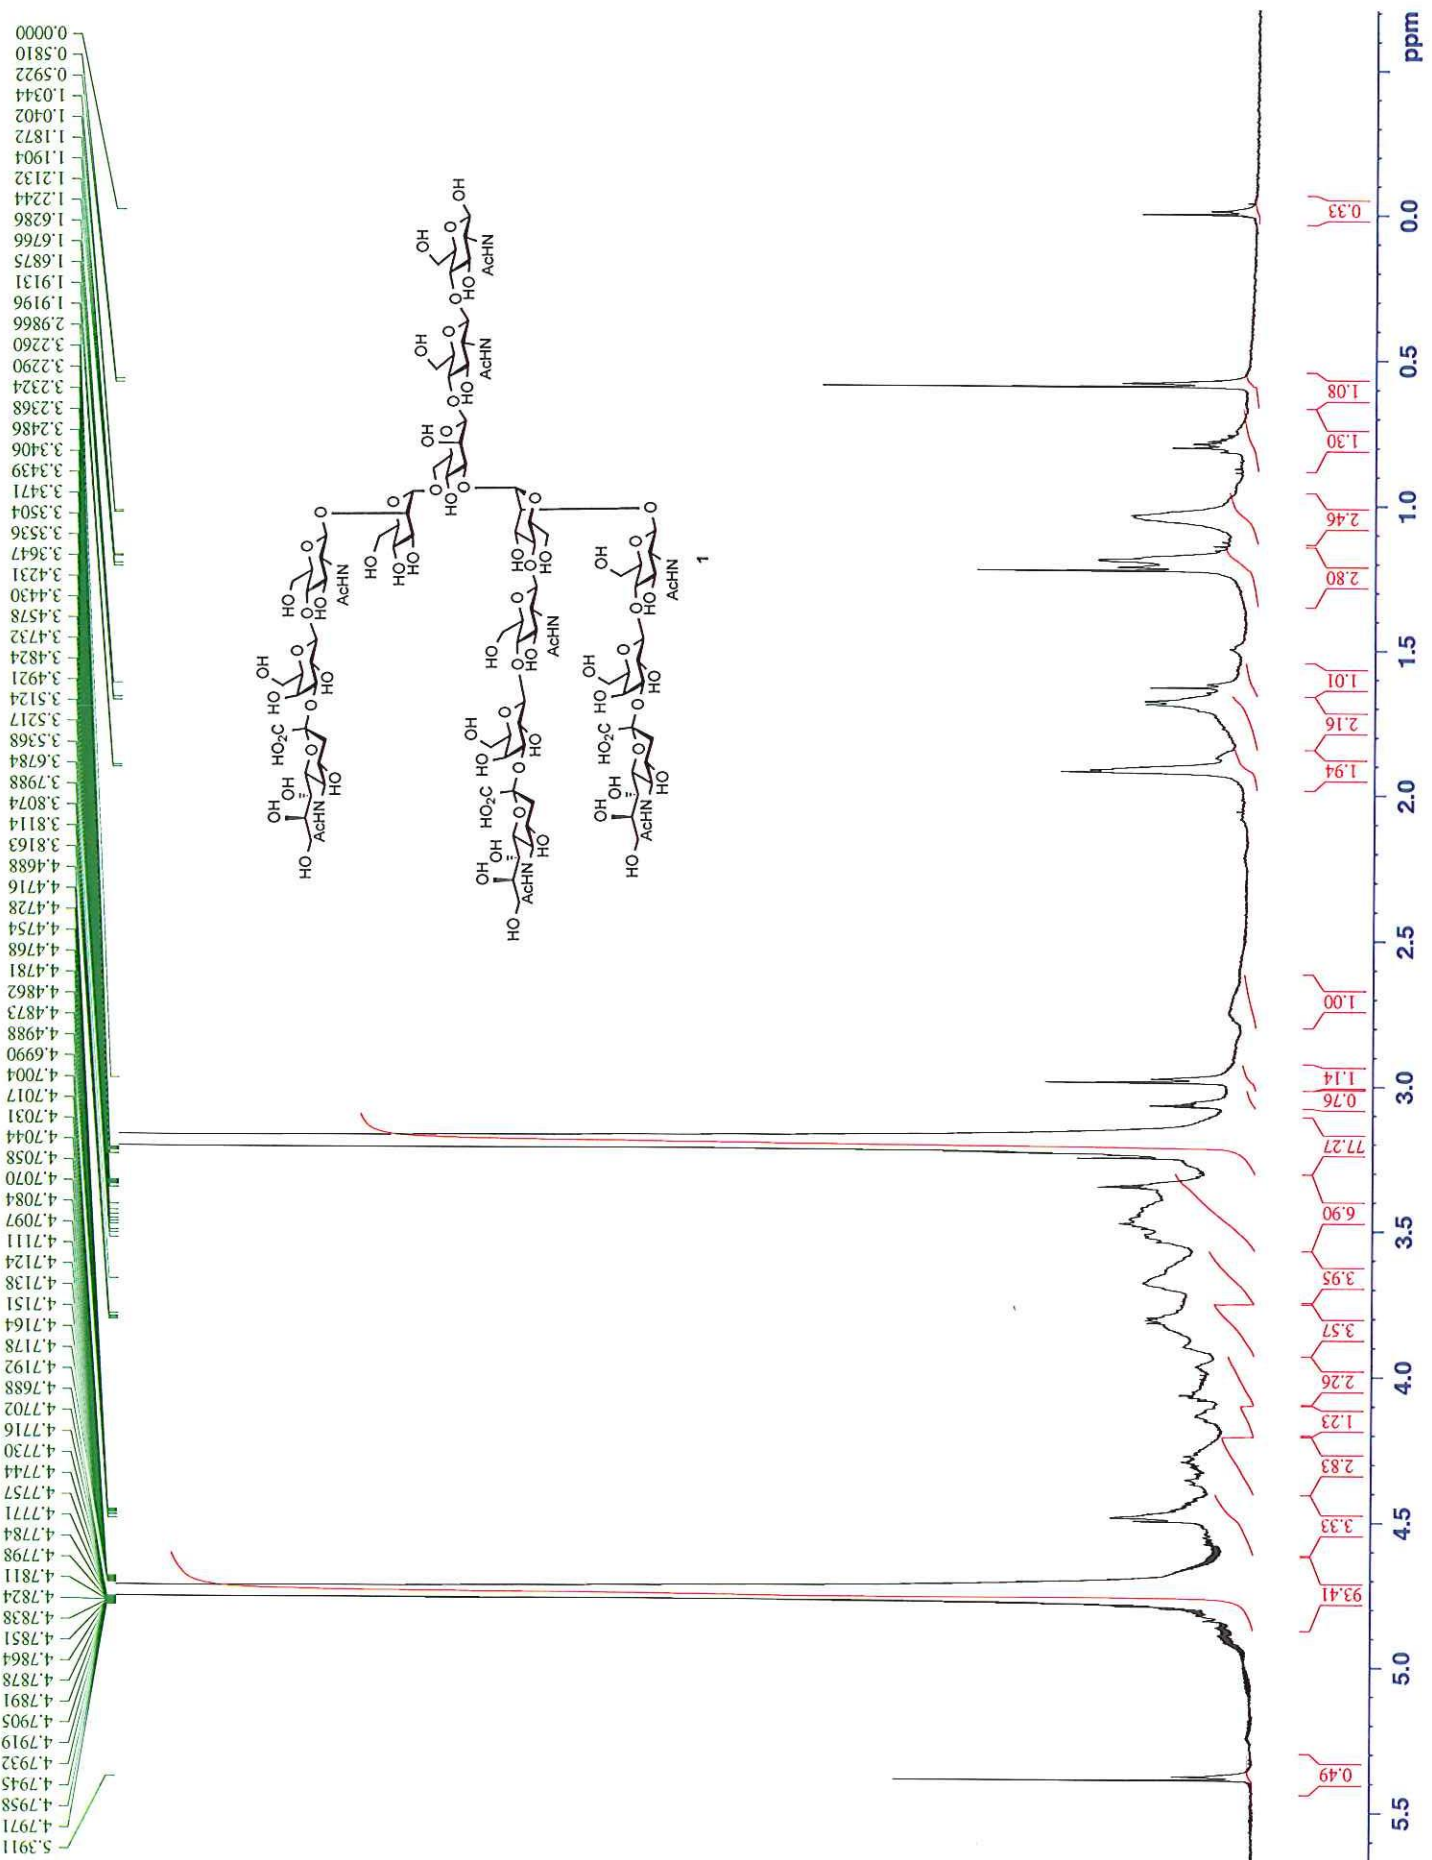

Supplement: NIHMS409459-supplement-1_si_001.pdf [file NIHMS409459-supplement-1_si_001.pdf]
